# Supplementary material for: Changes to Serum Sample Tube and Processing Methodology Does Not Cause Inter-Individual Variation in Automated Whole Serum N-Glycan Profiling in Health and Disease
Source: PubMed Central journal article supplement (PMC4382121; doi:10.1371/journal.pone.0123028), 2015-04-01

A-1

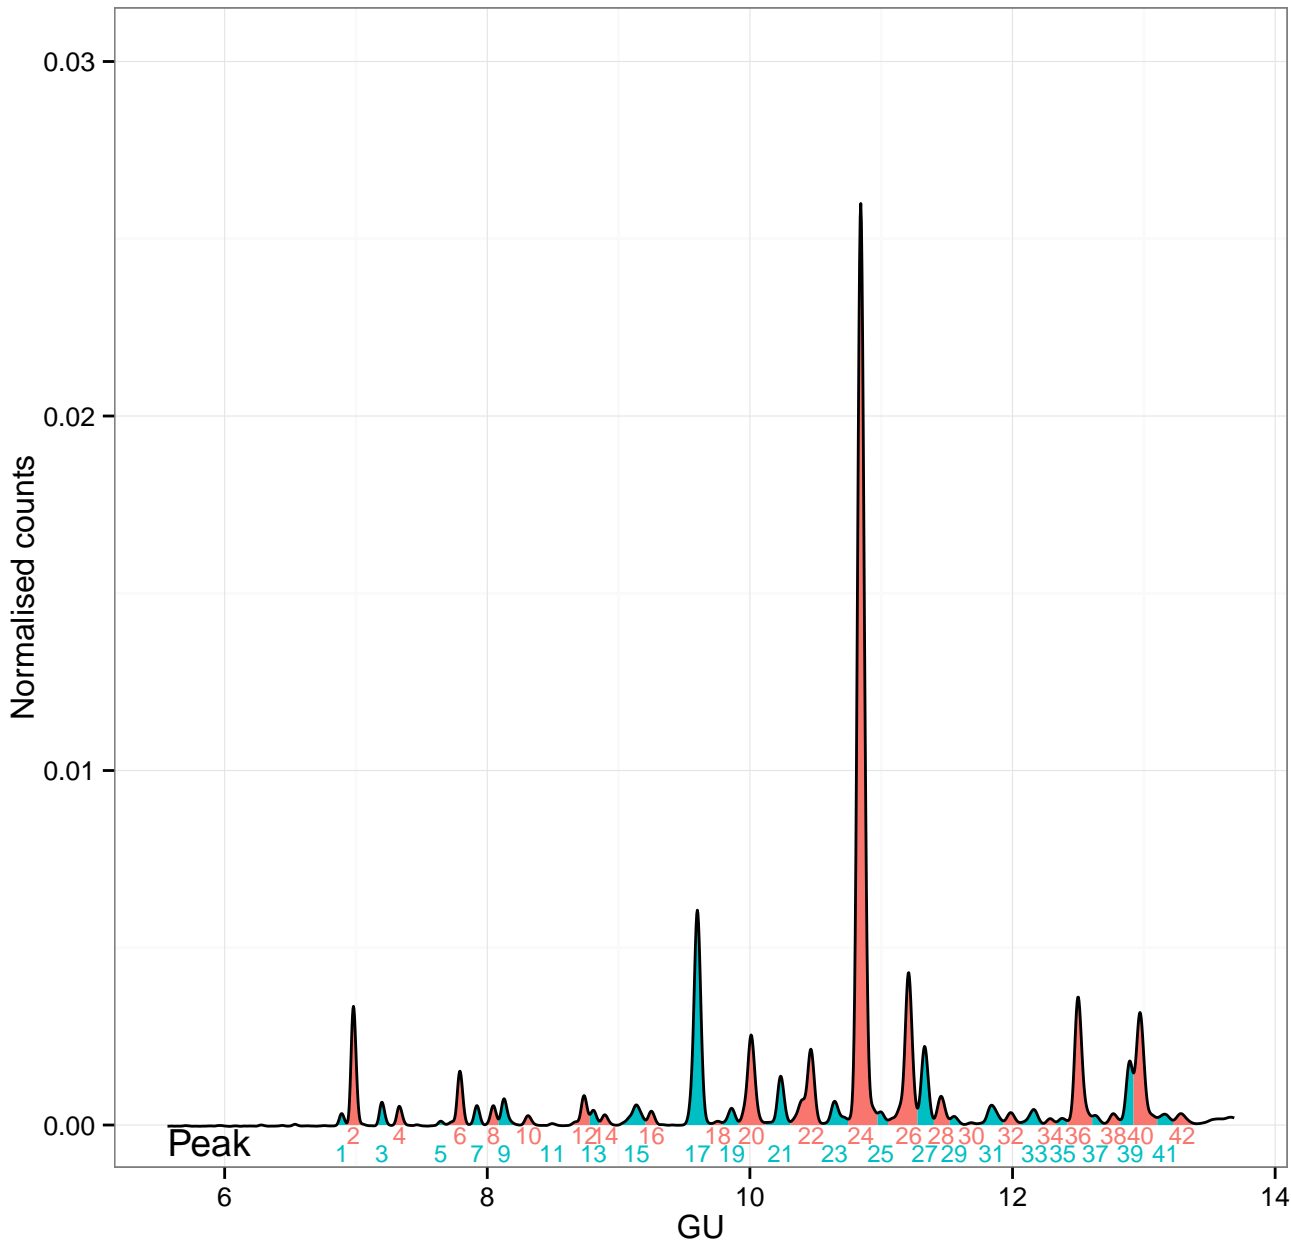

A-2

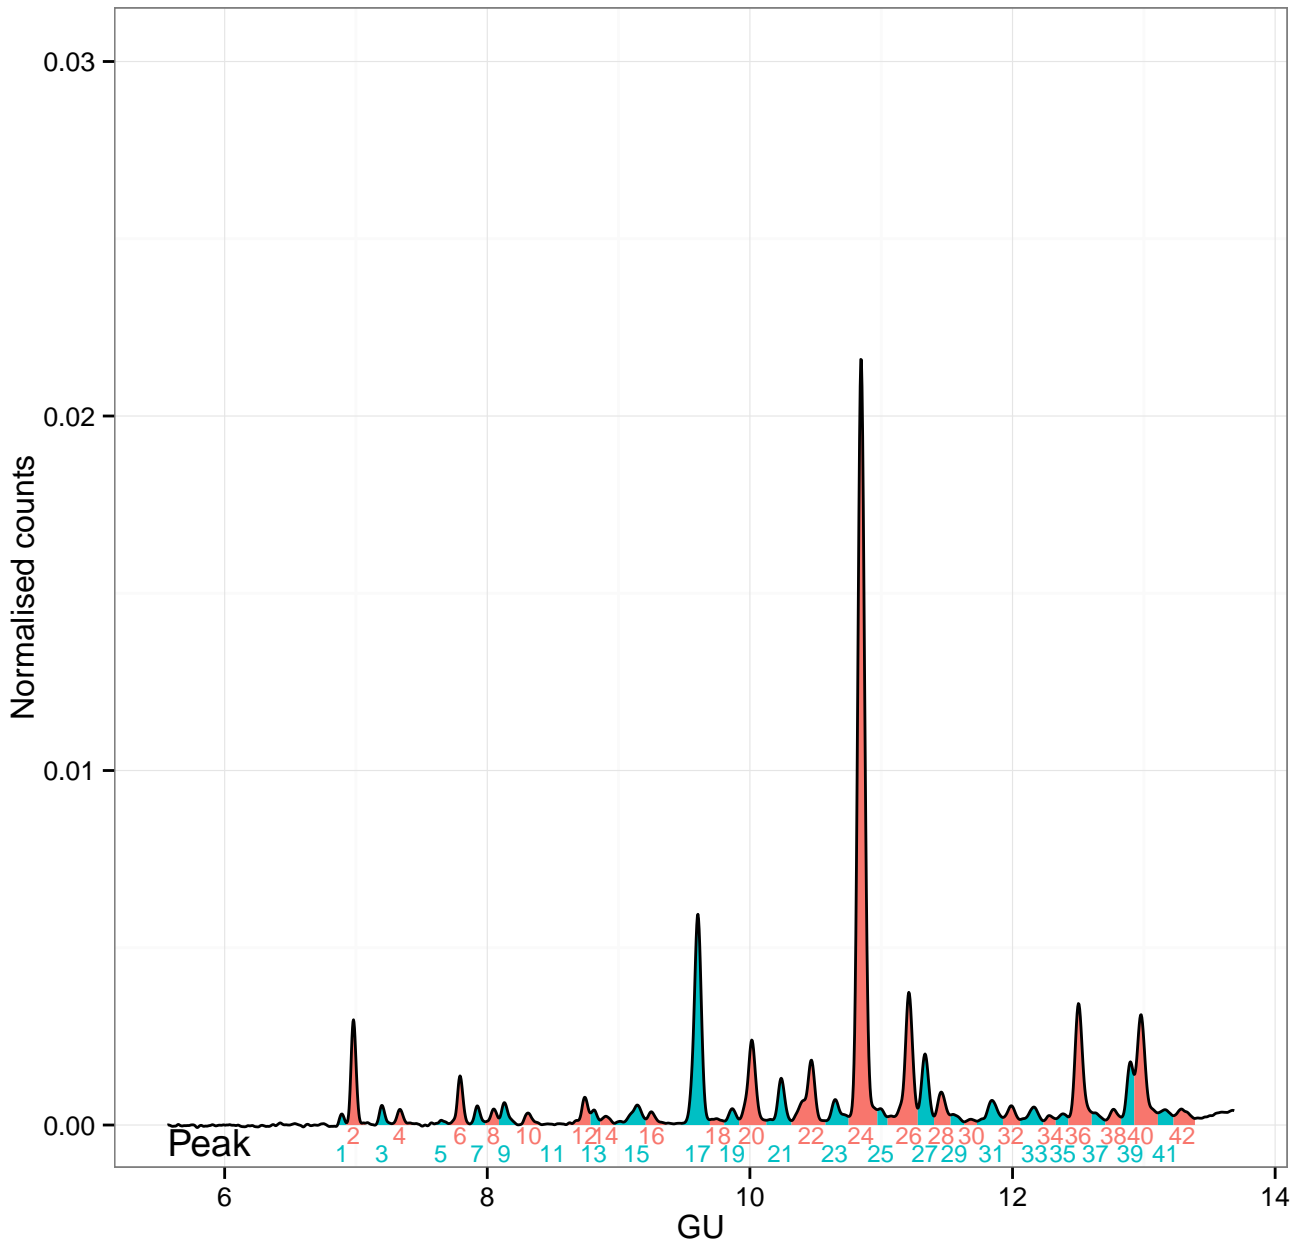

A-3

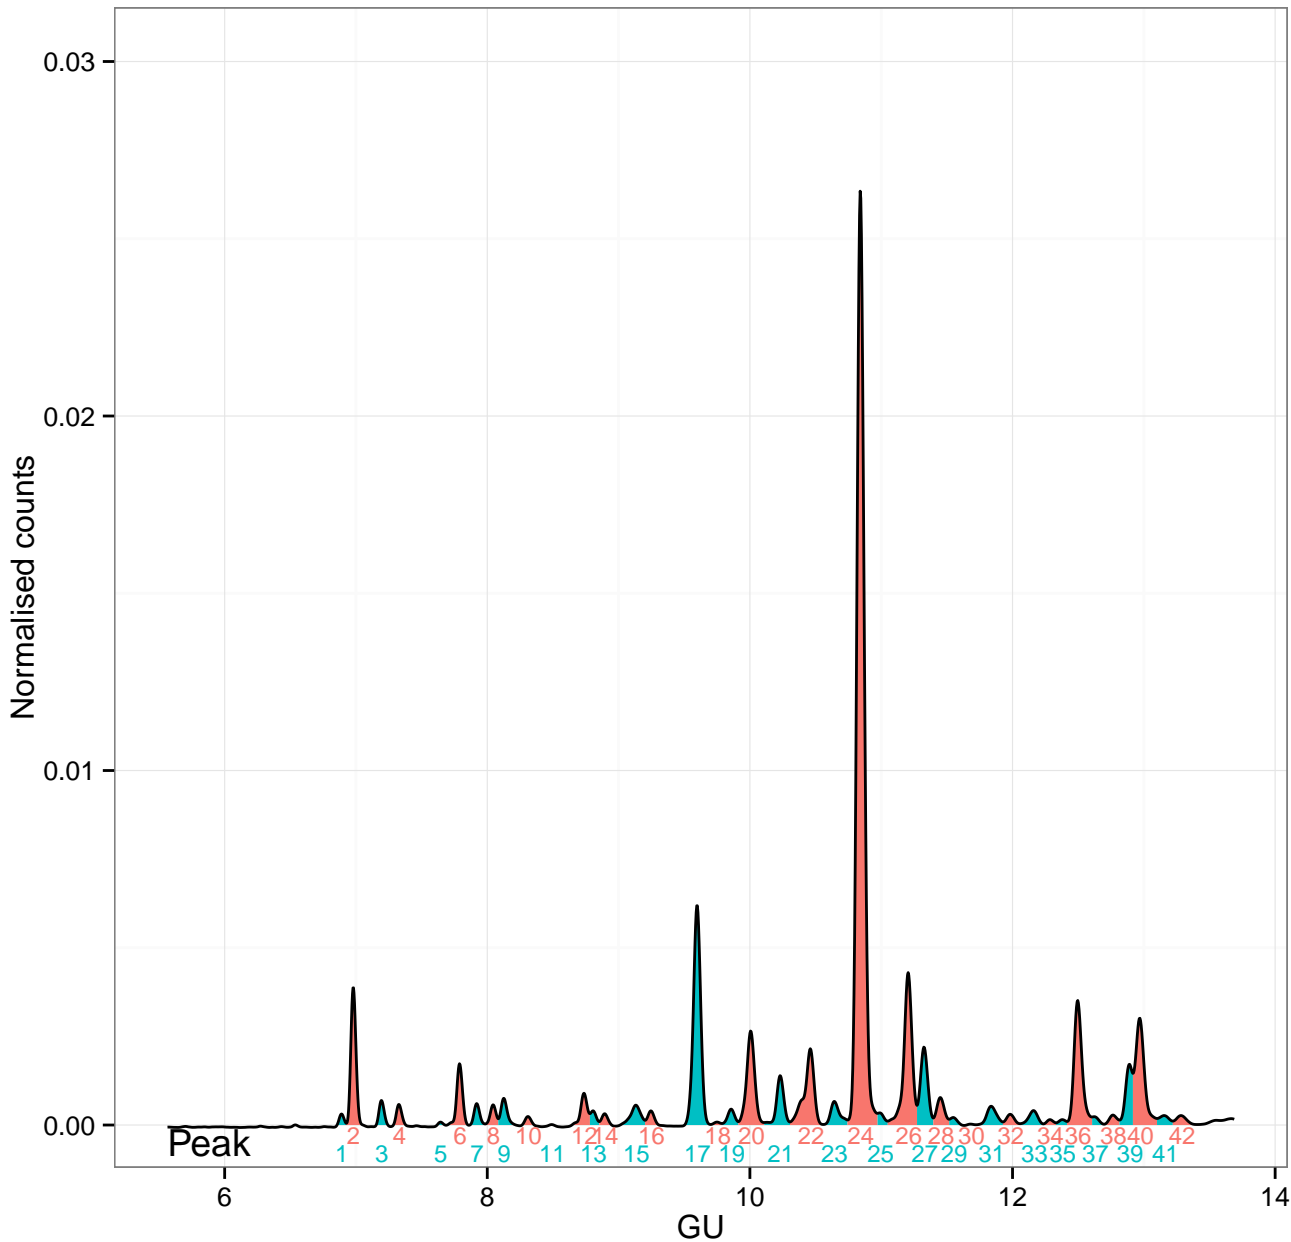

B-1

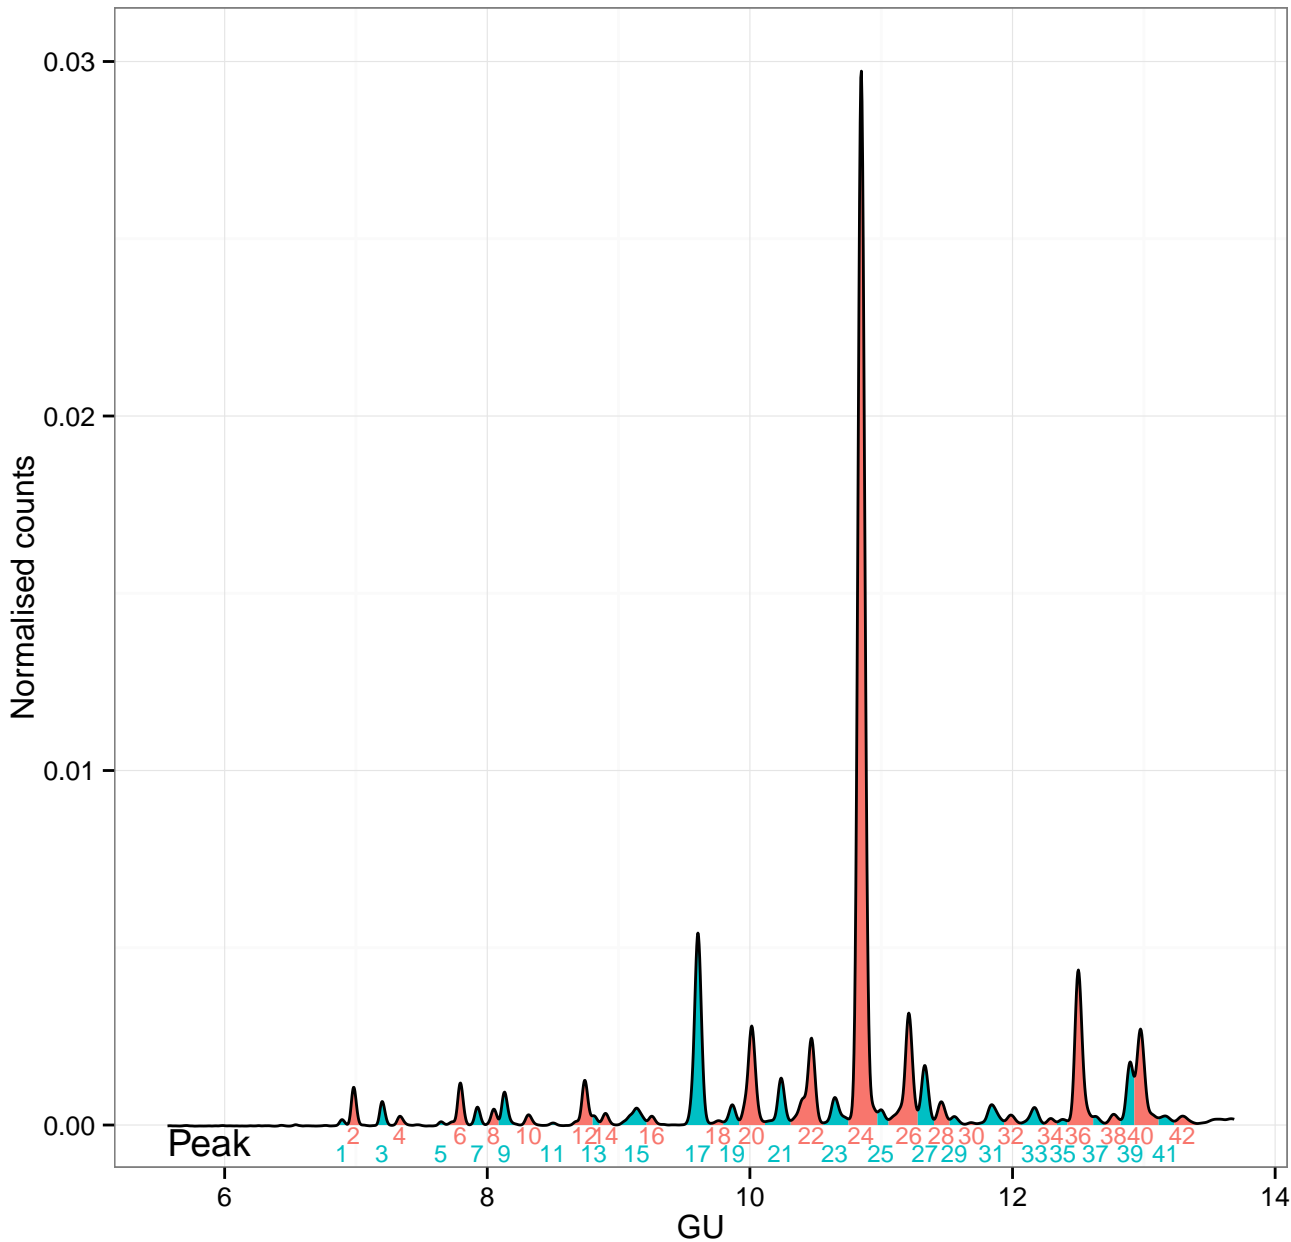

# B-2

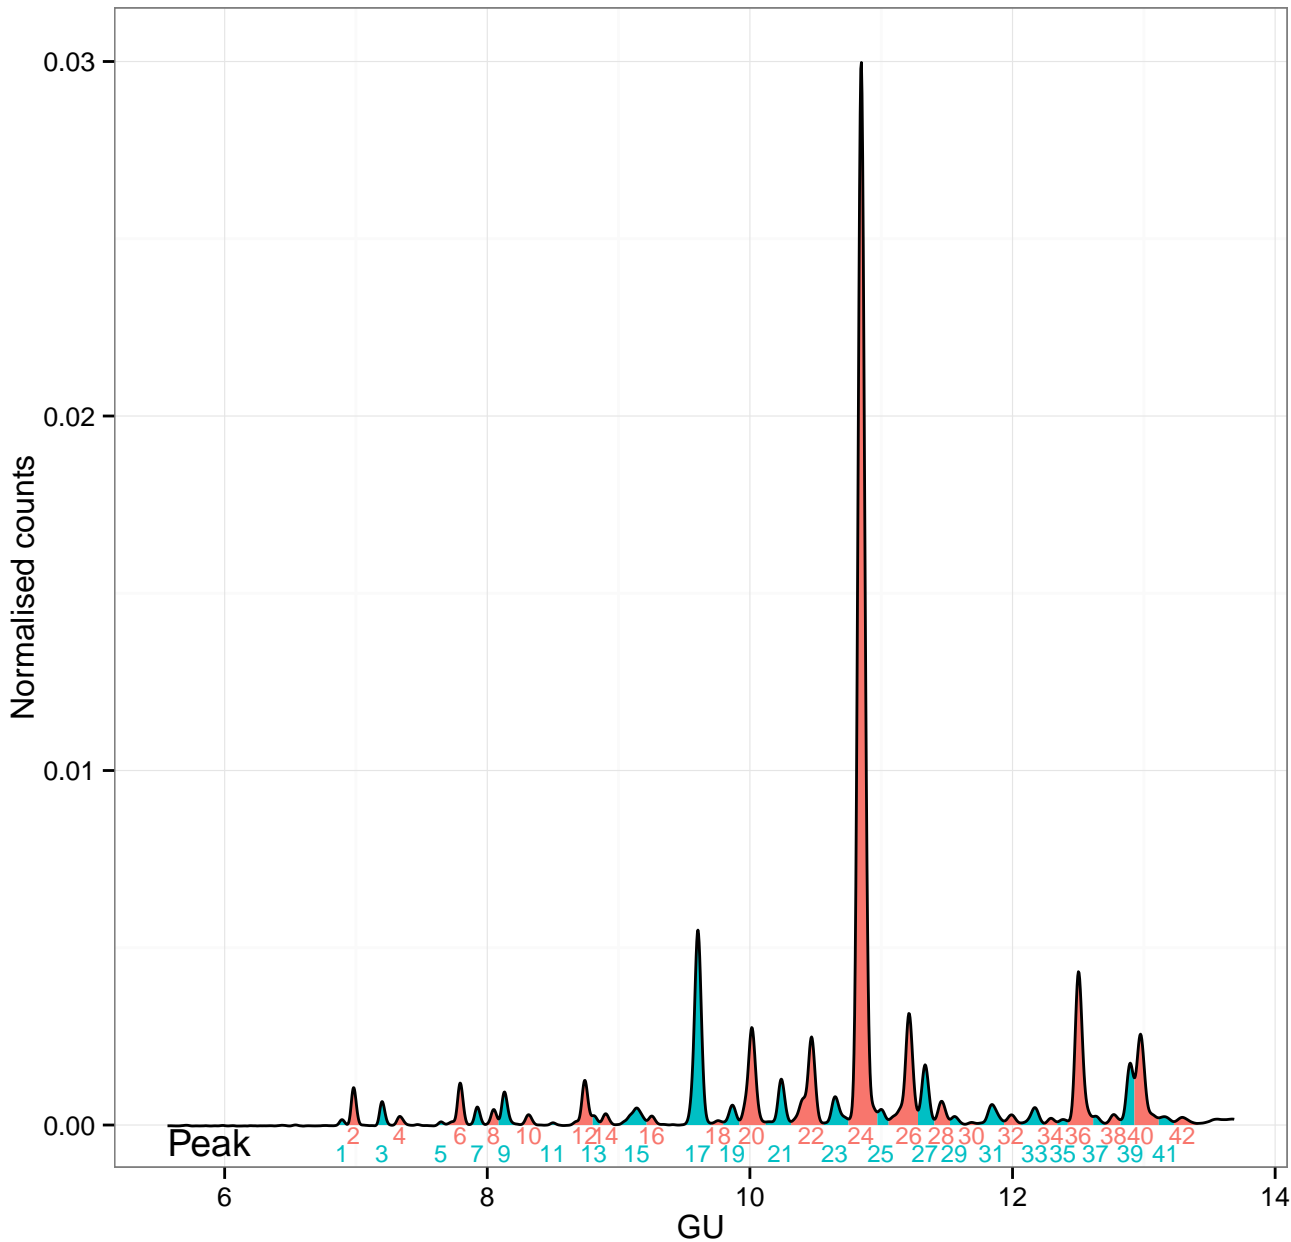

# B-3

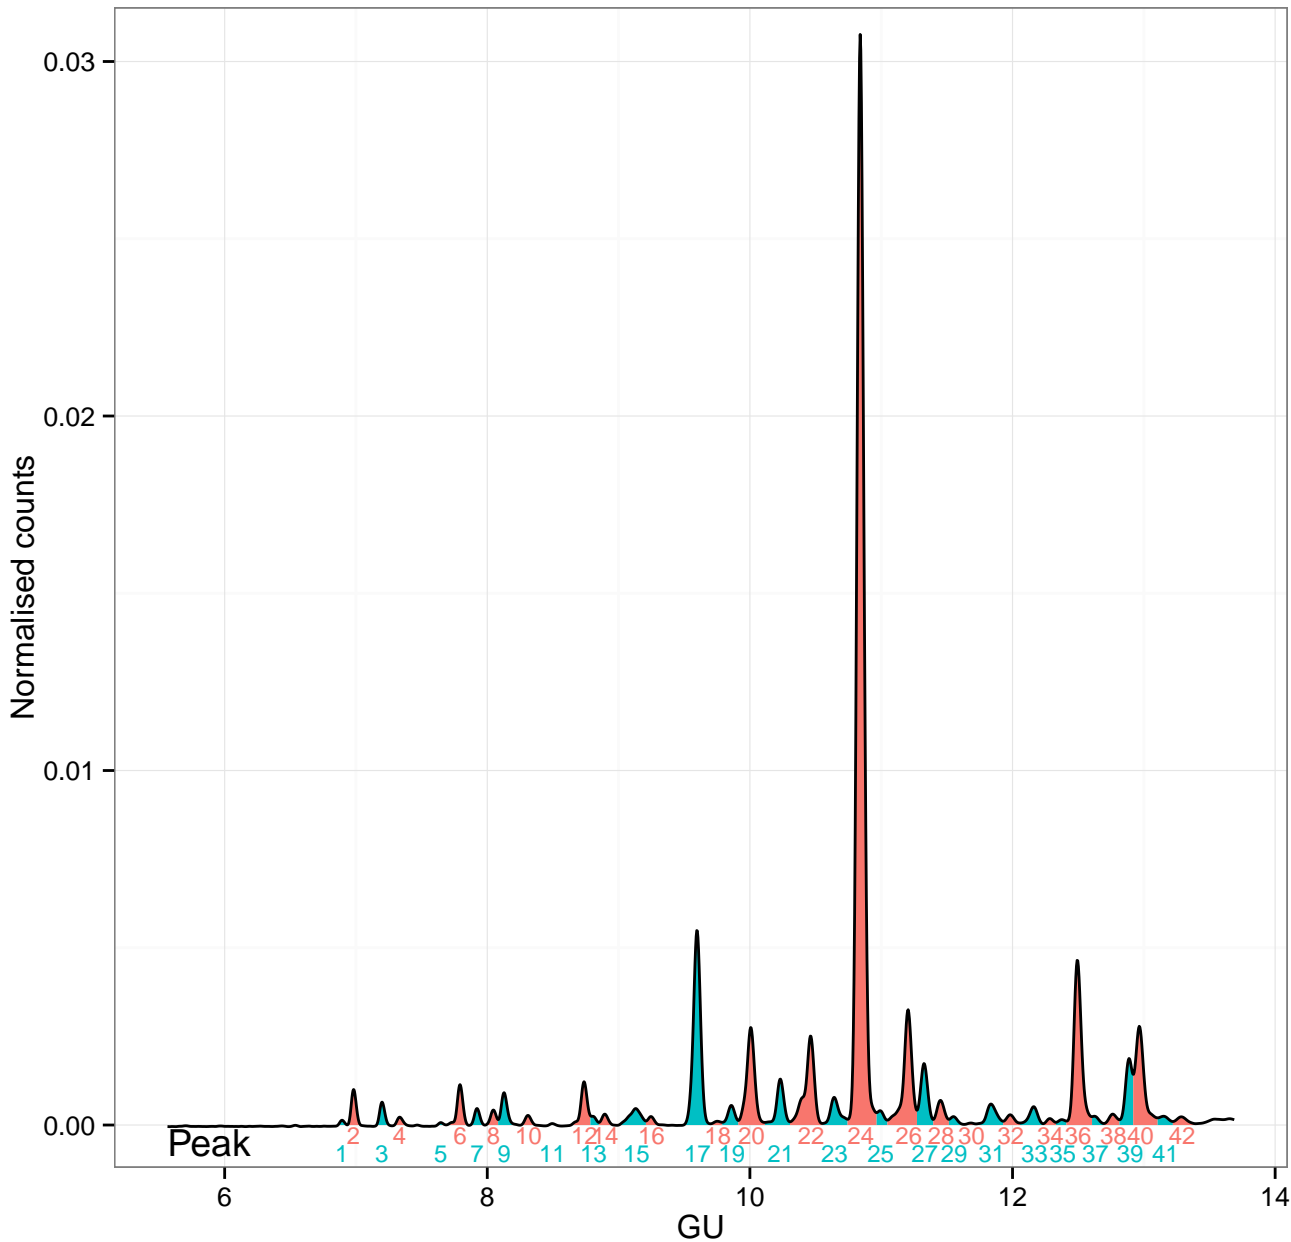

# C-1

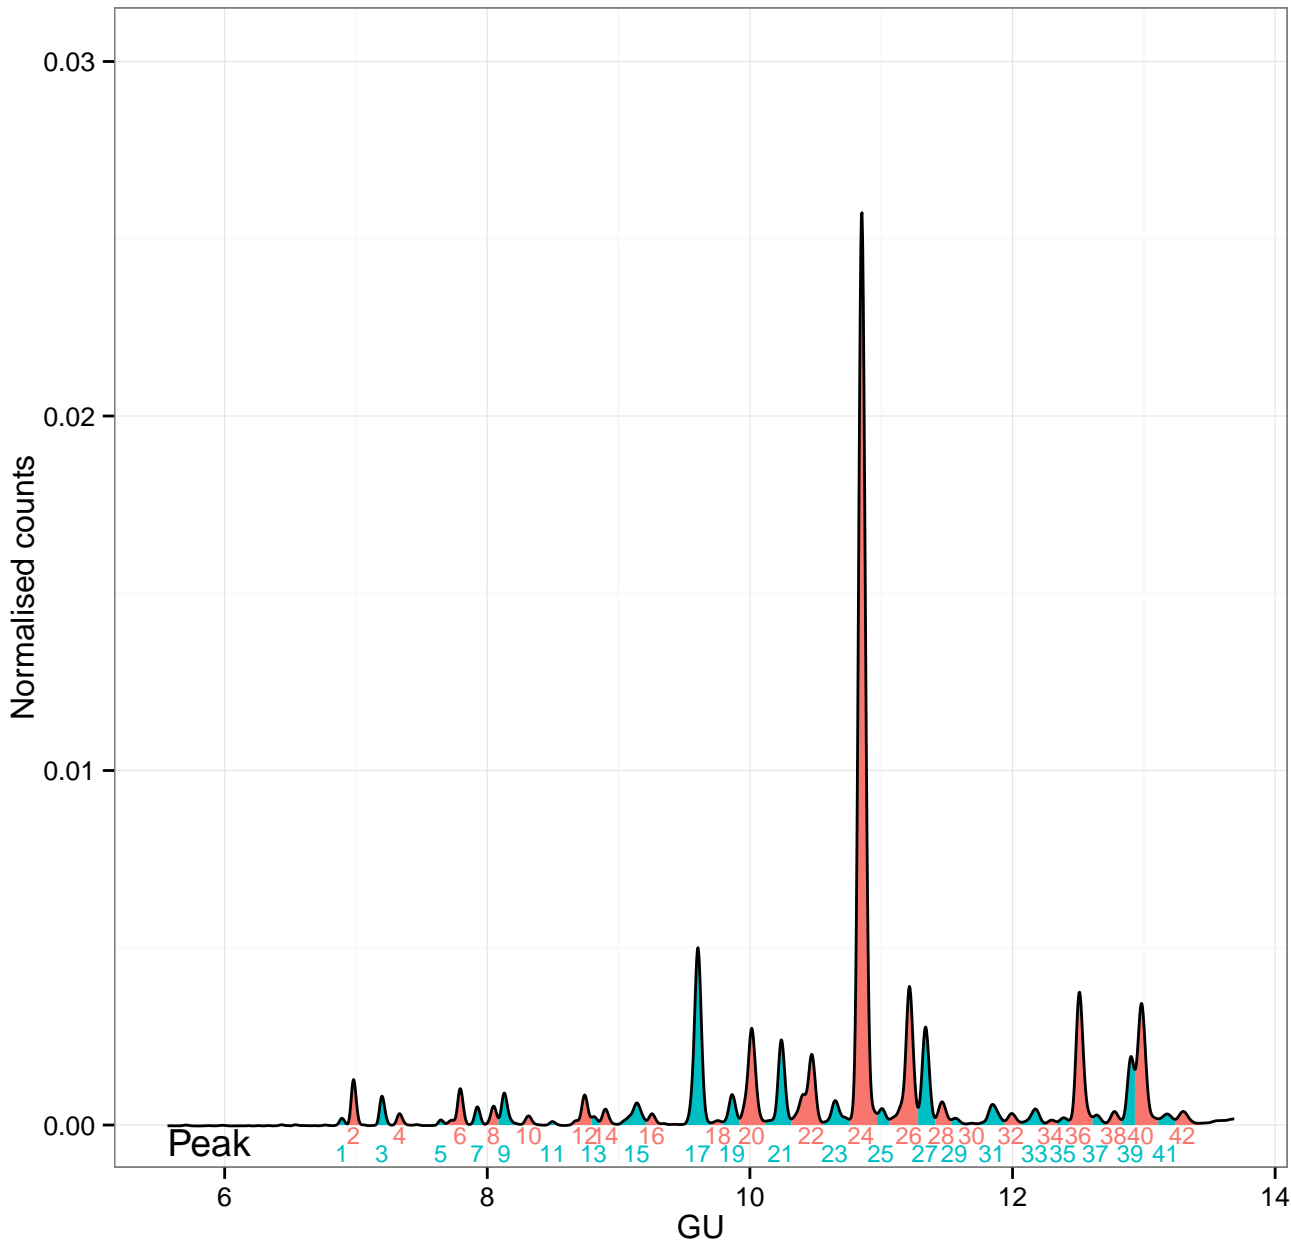

# C-2

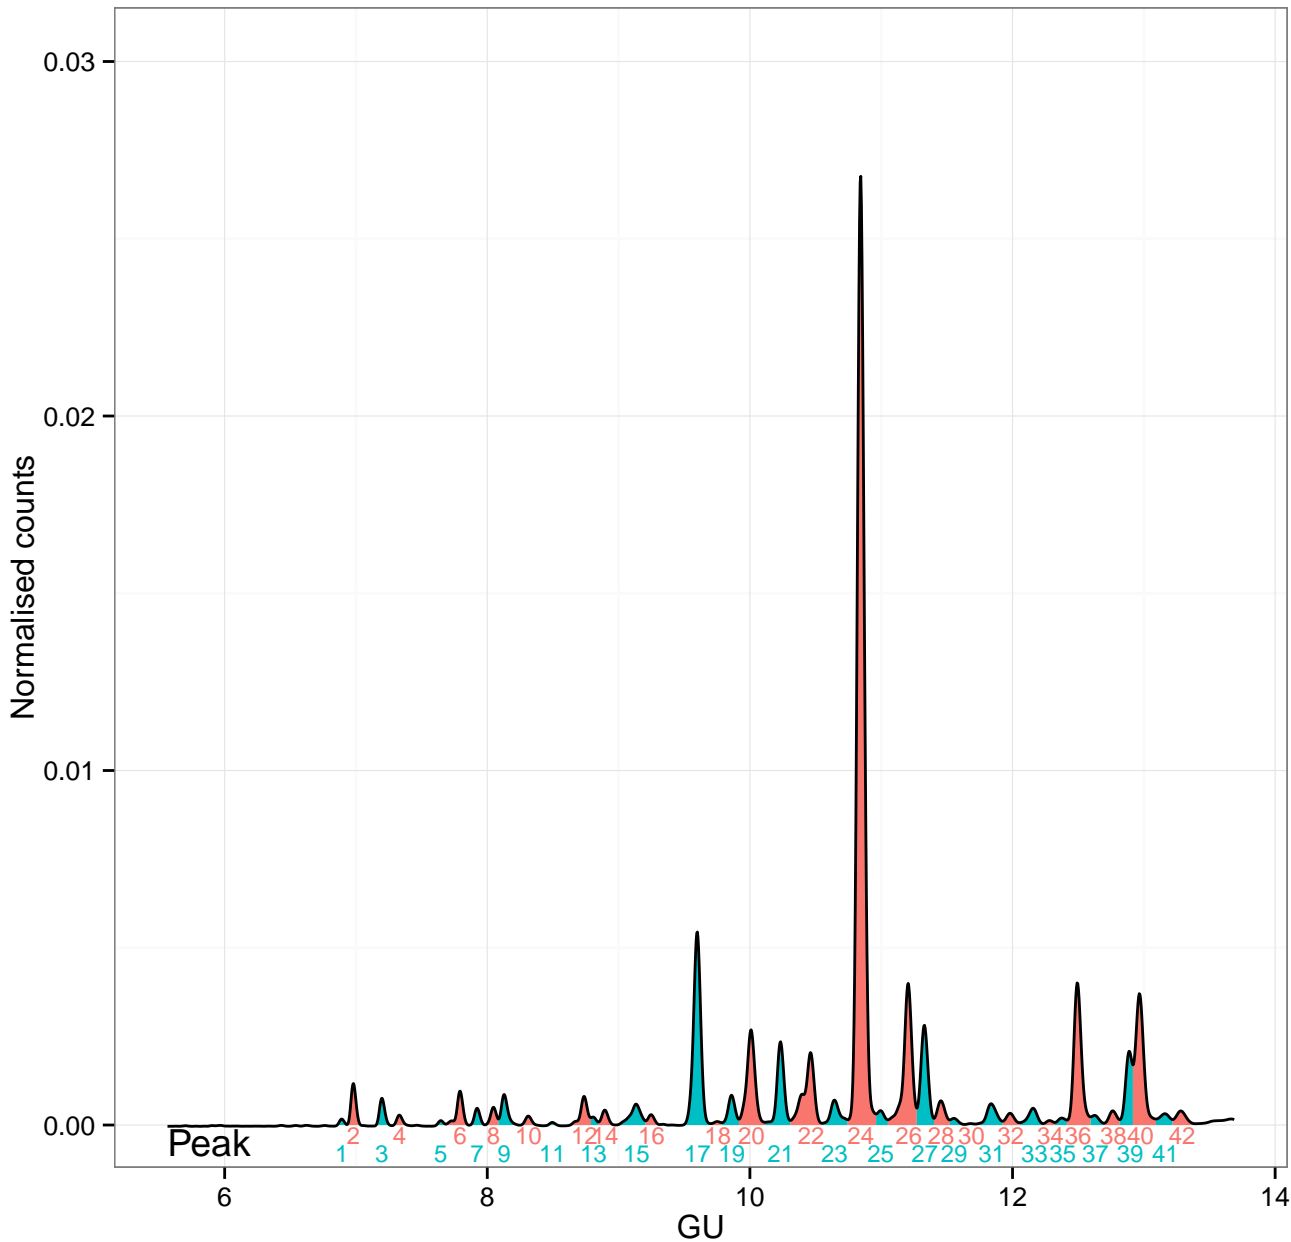



# C-3

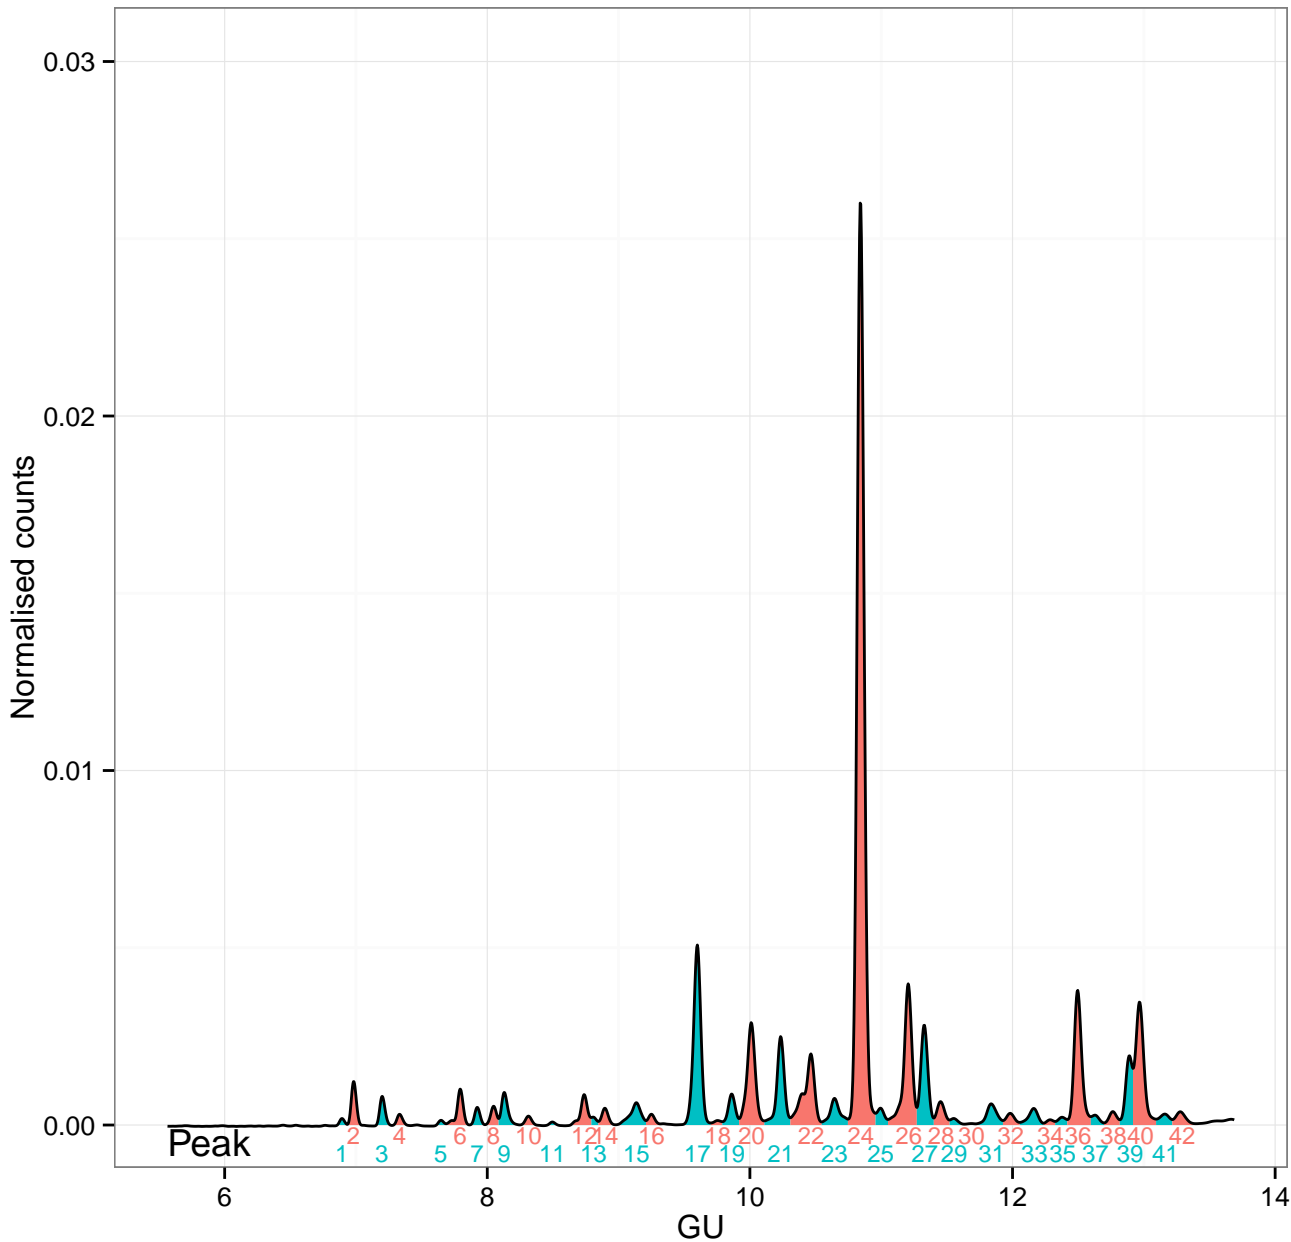

# D-1

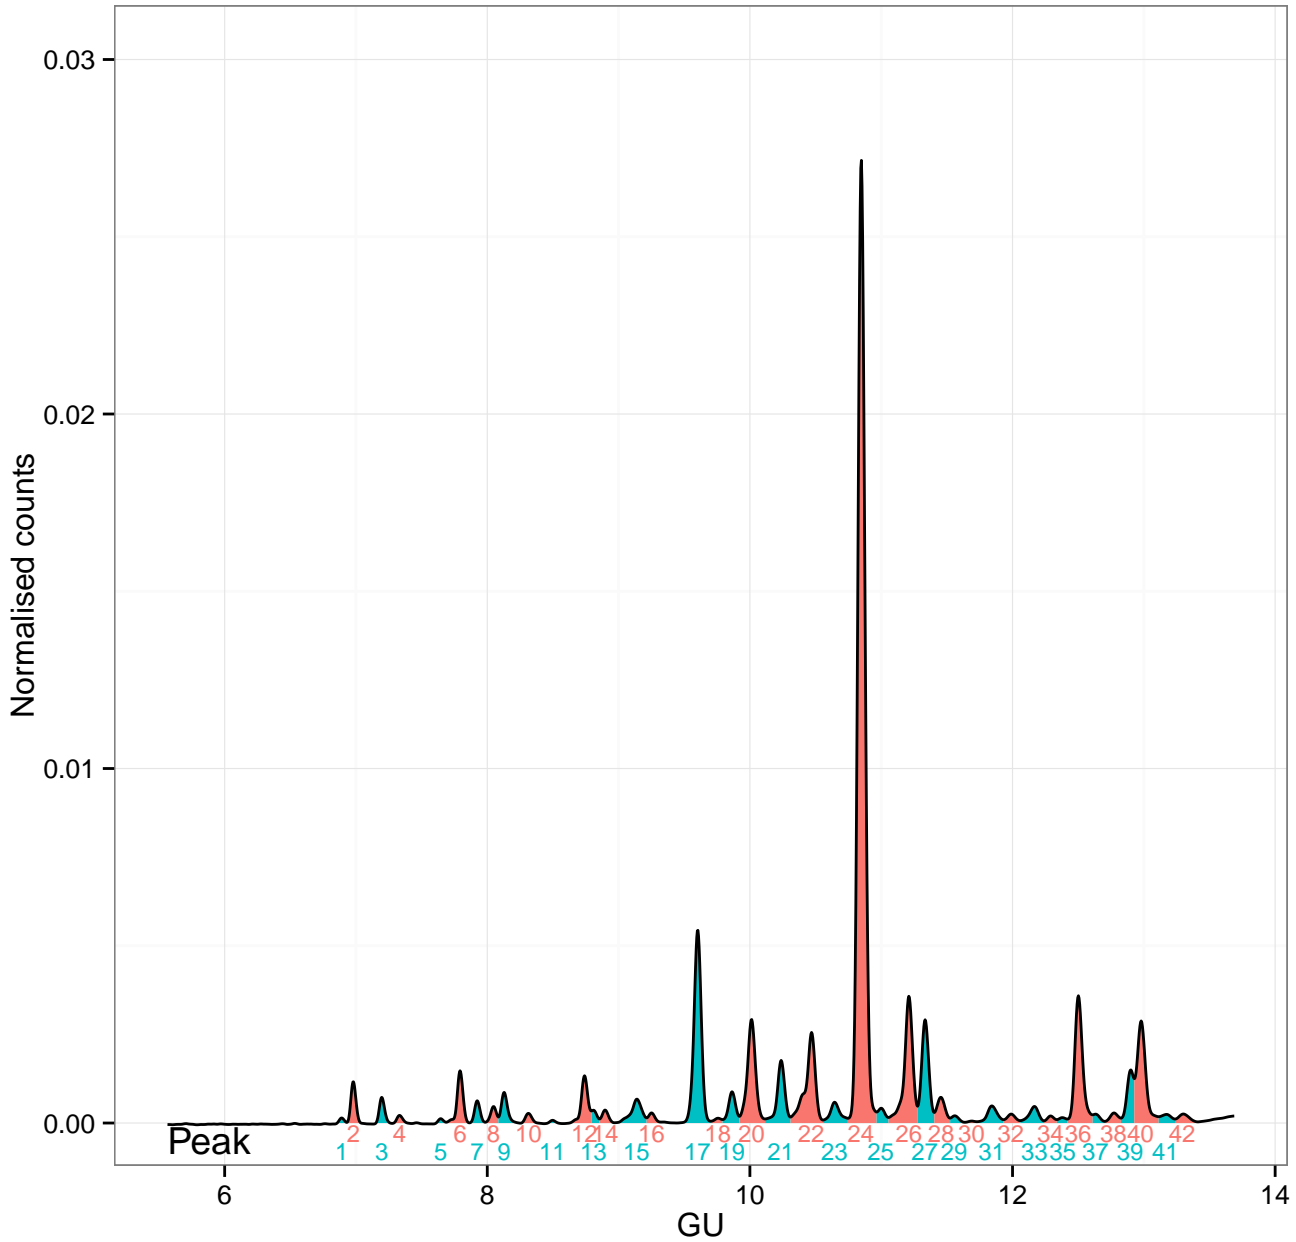

# D-2

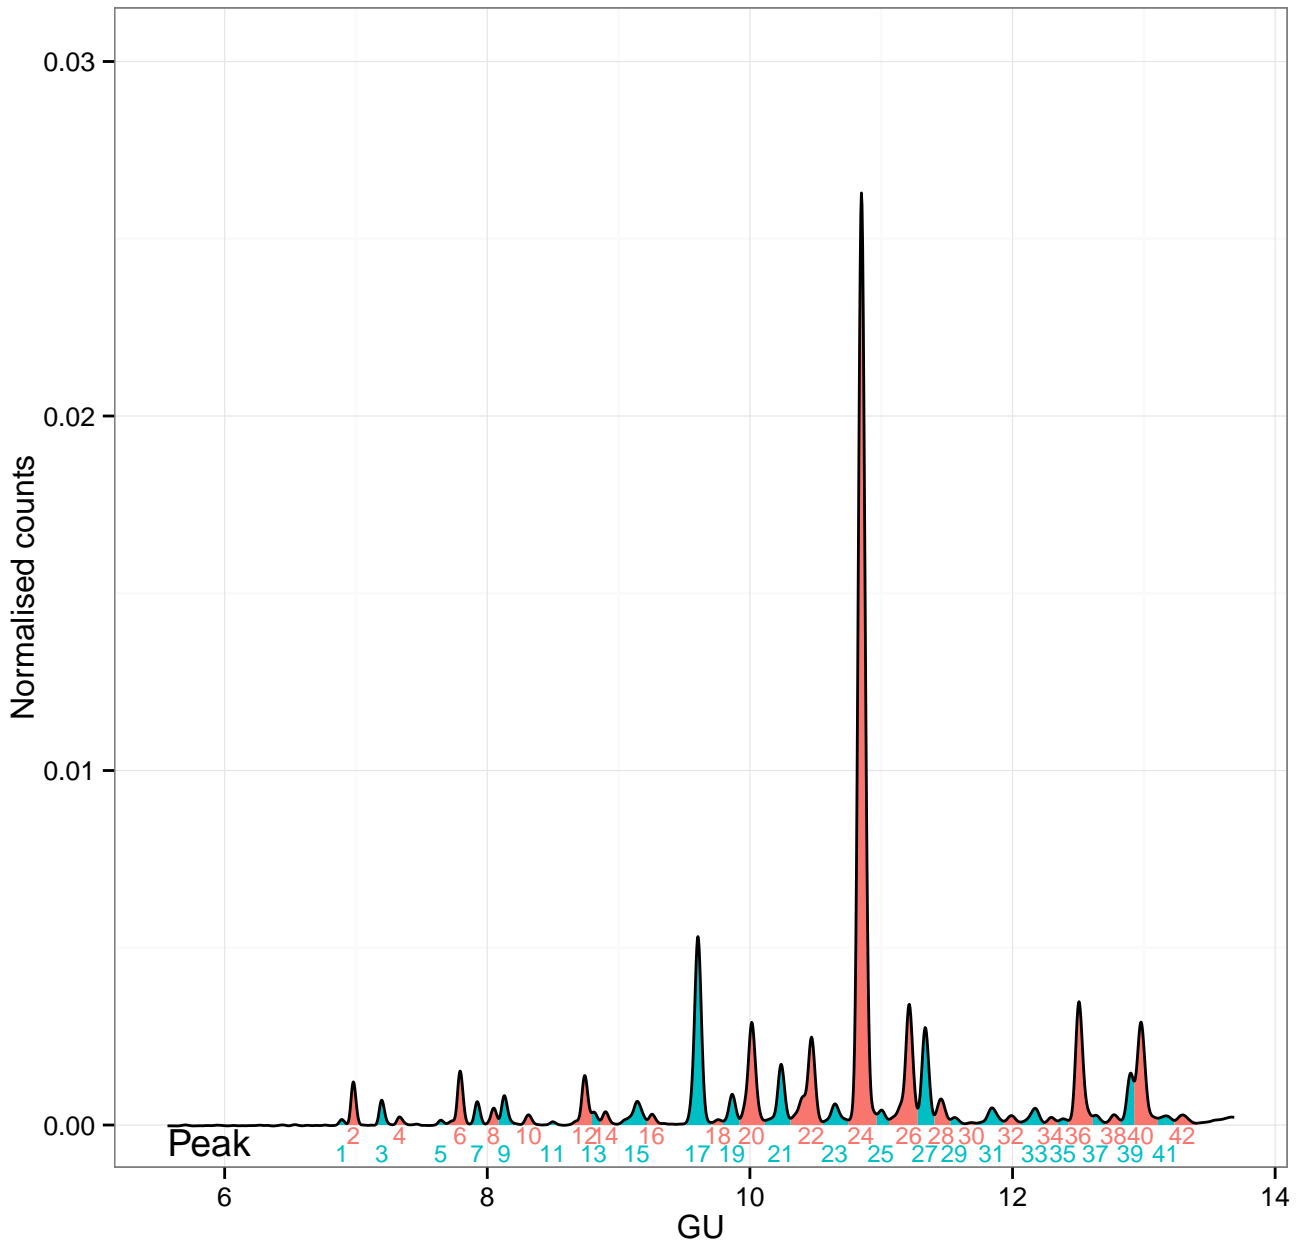

# D-3

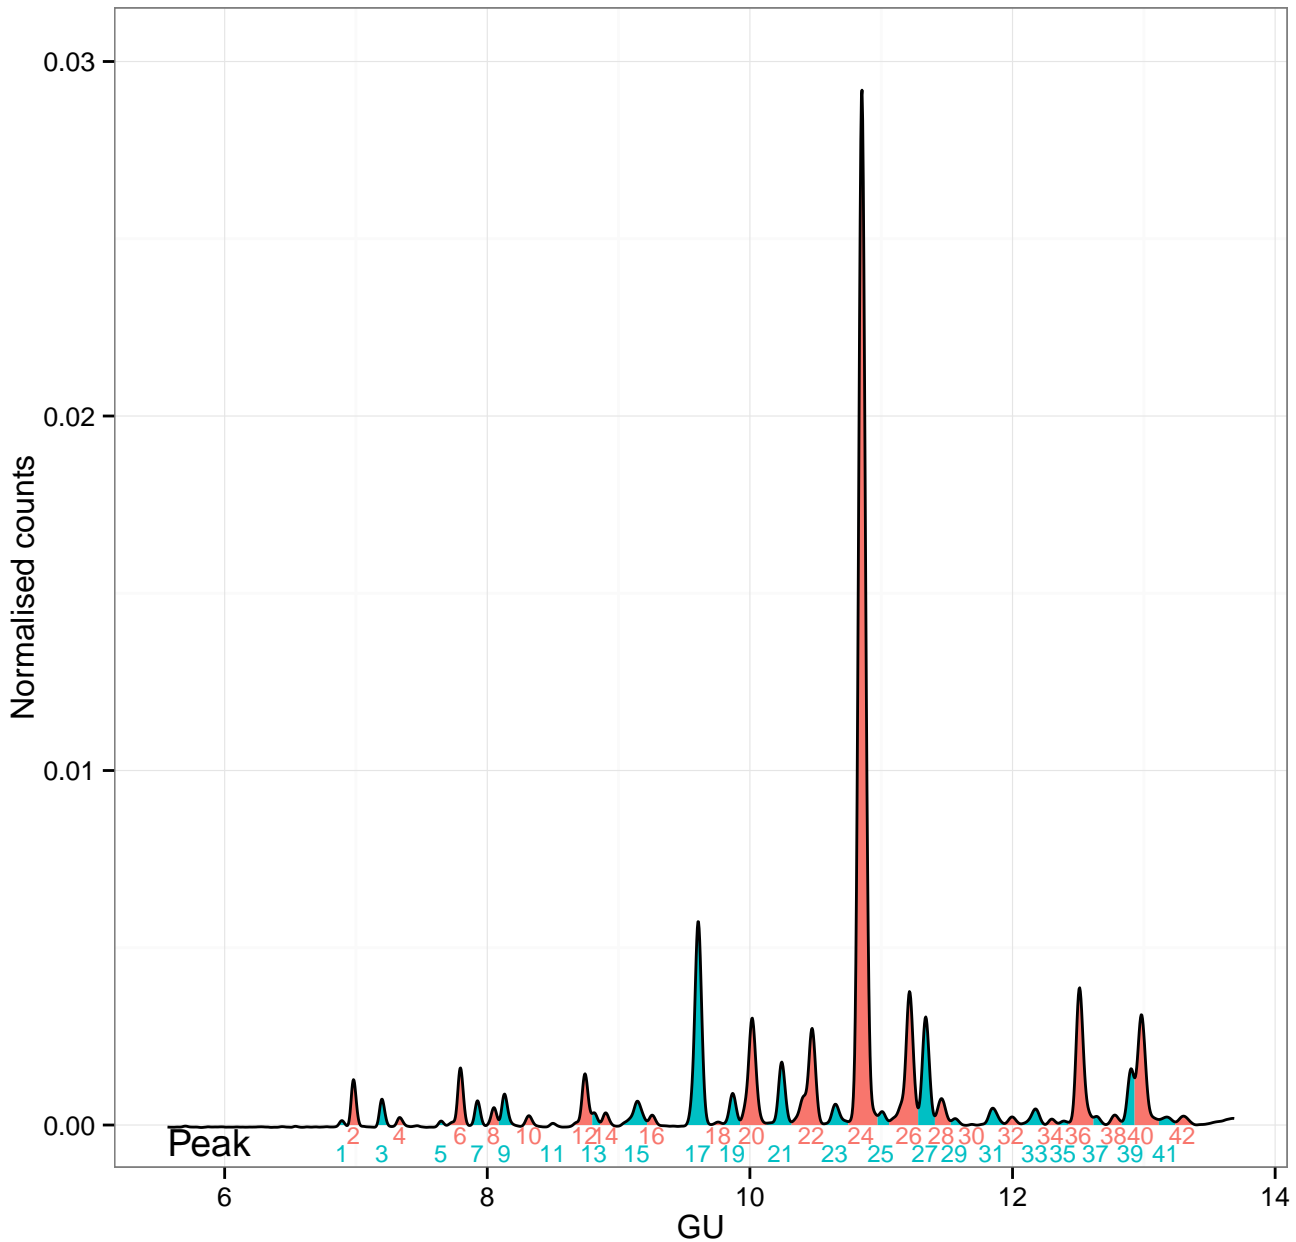

E-1

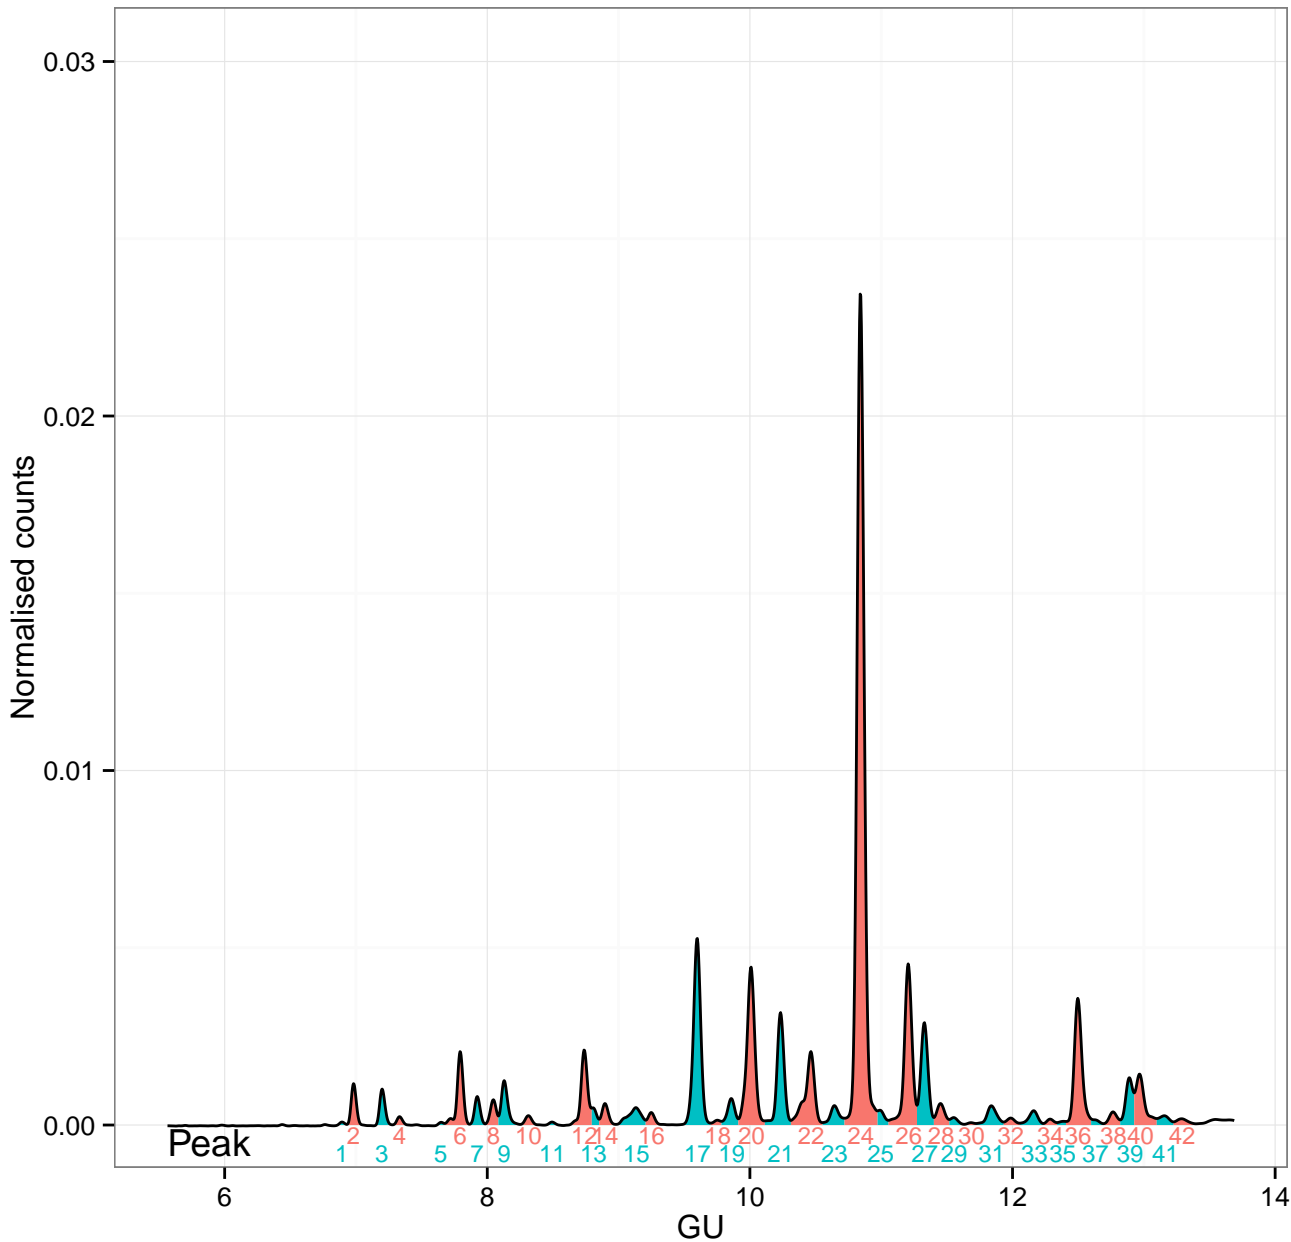

E-3

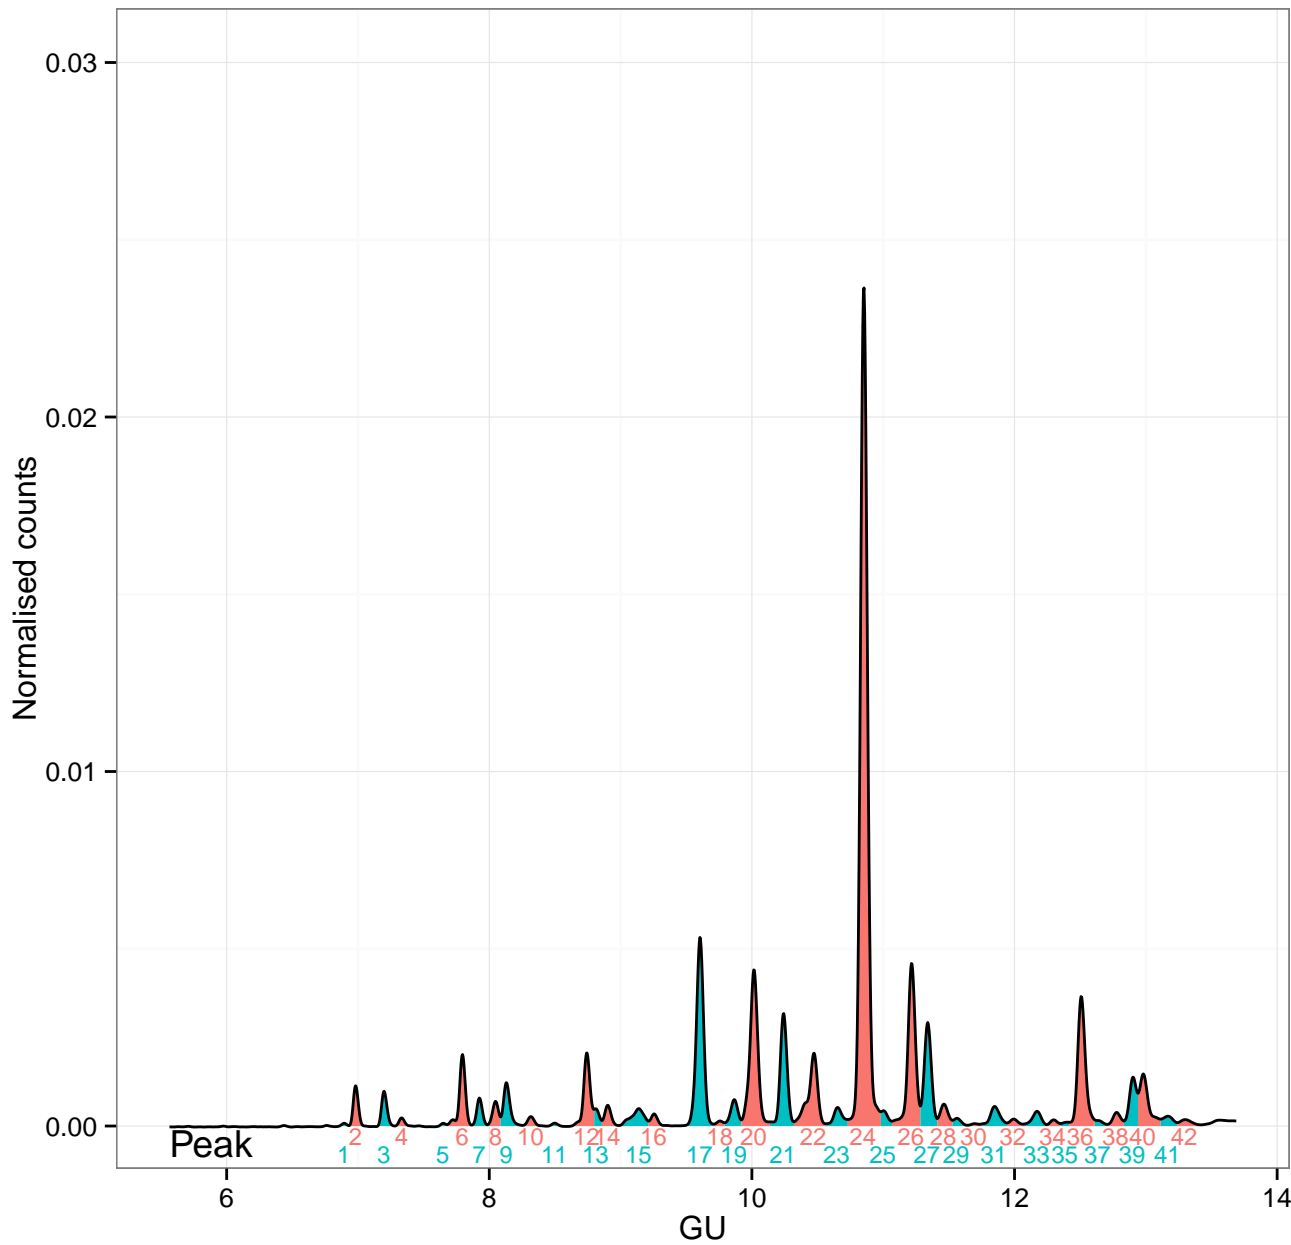

F-1

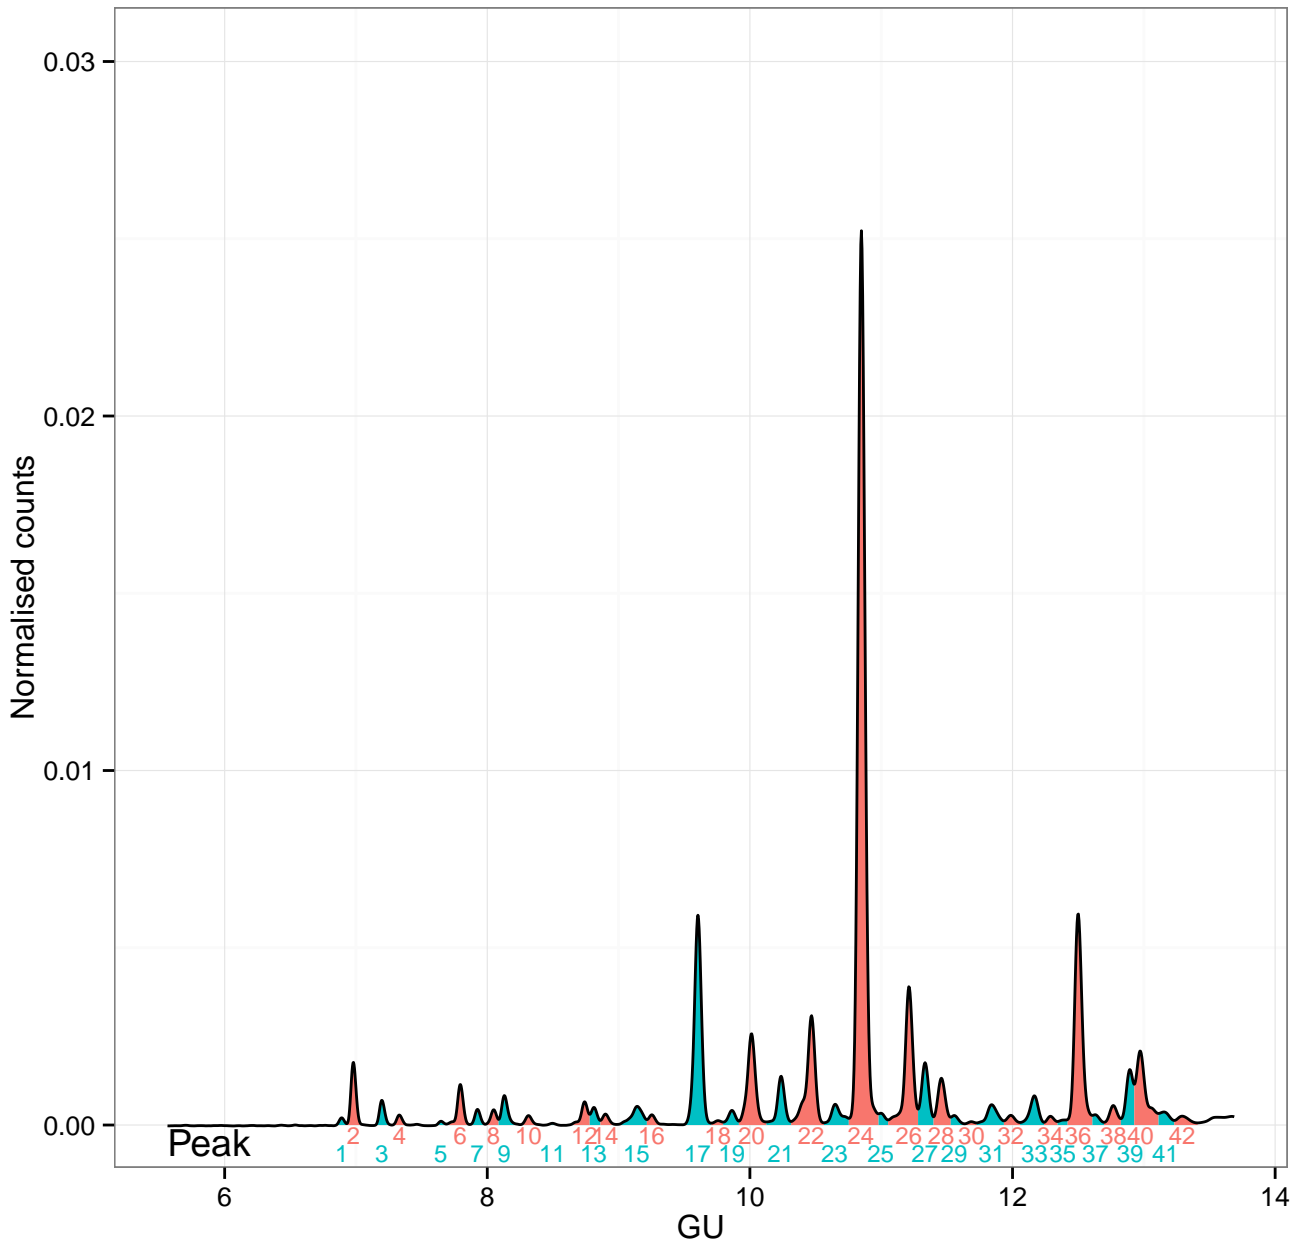

# F-3

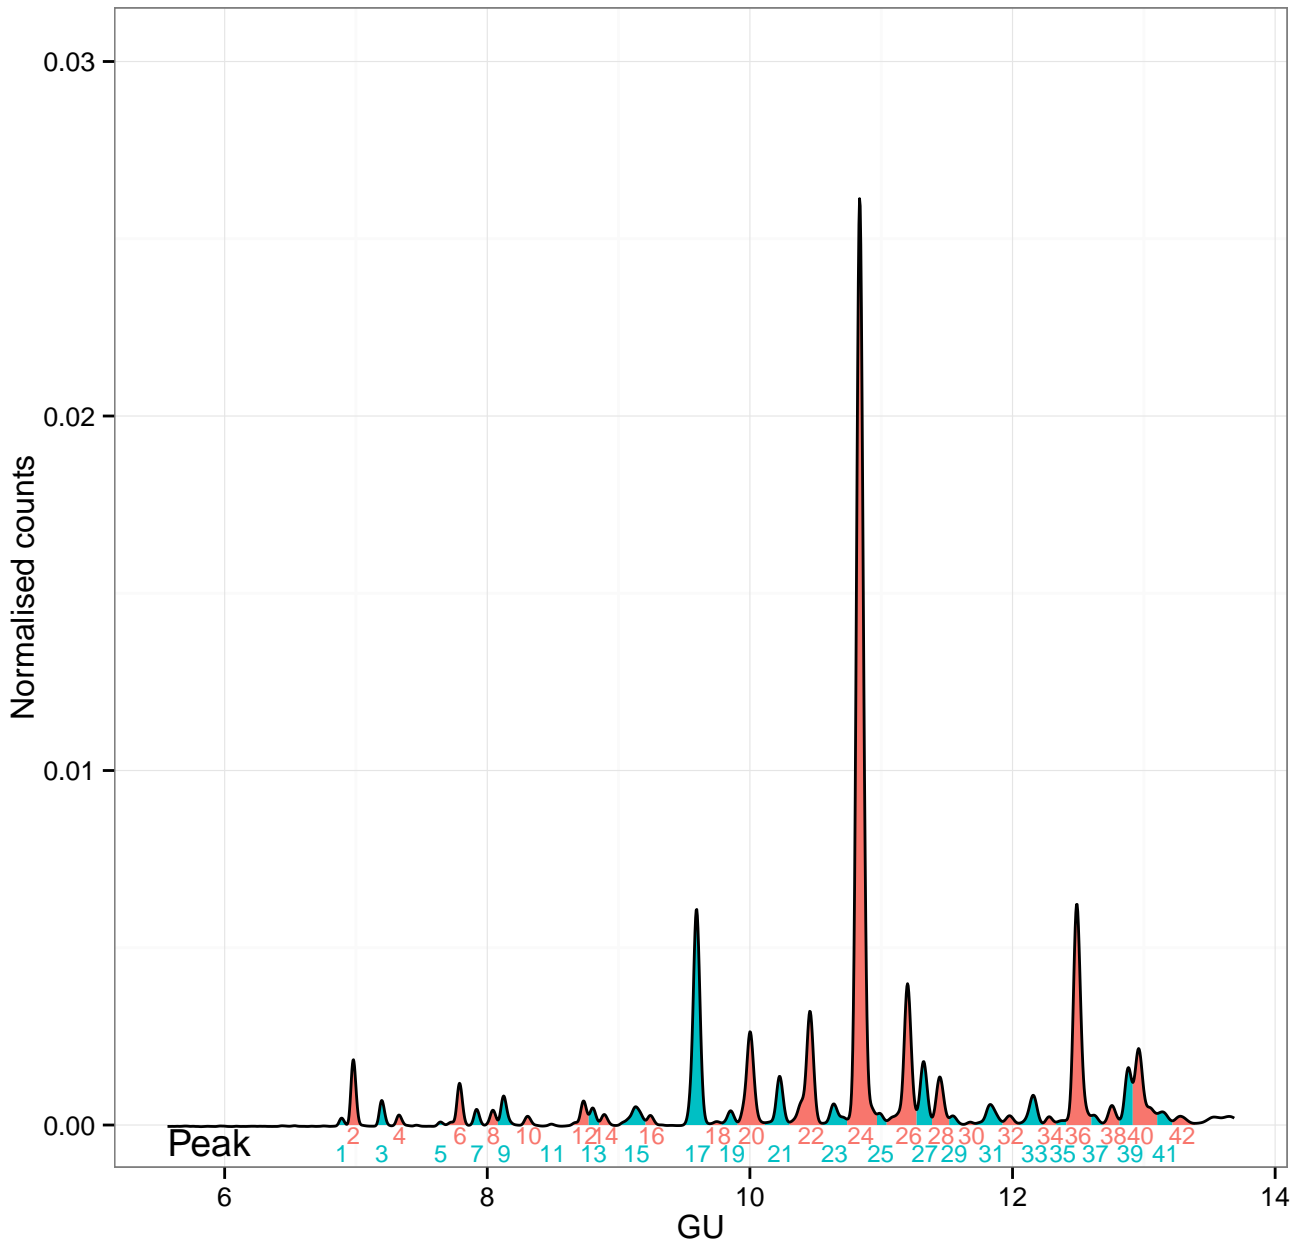





# G-2

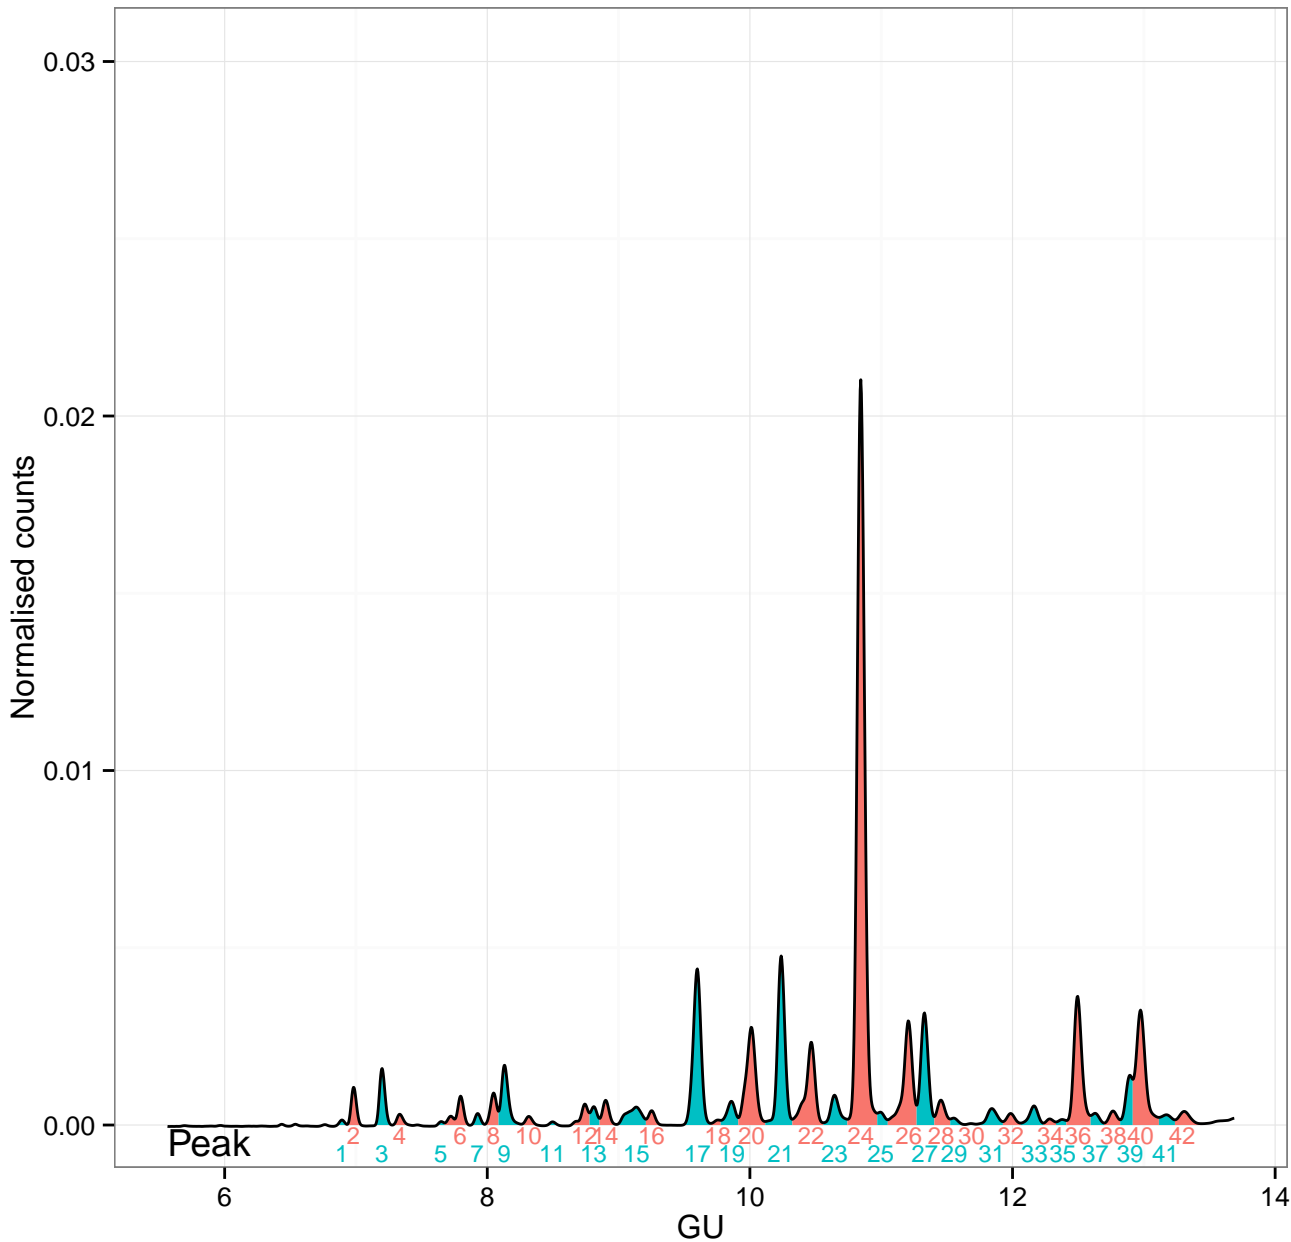

# G-3

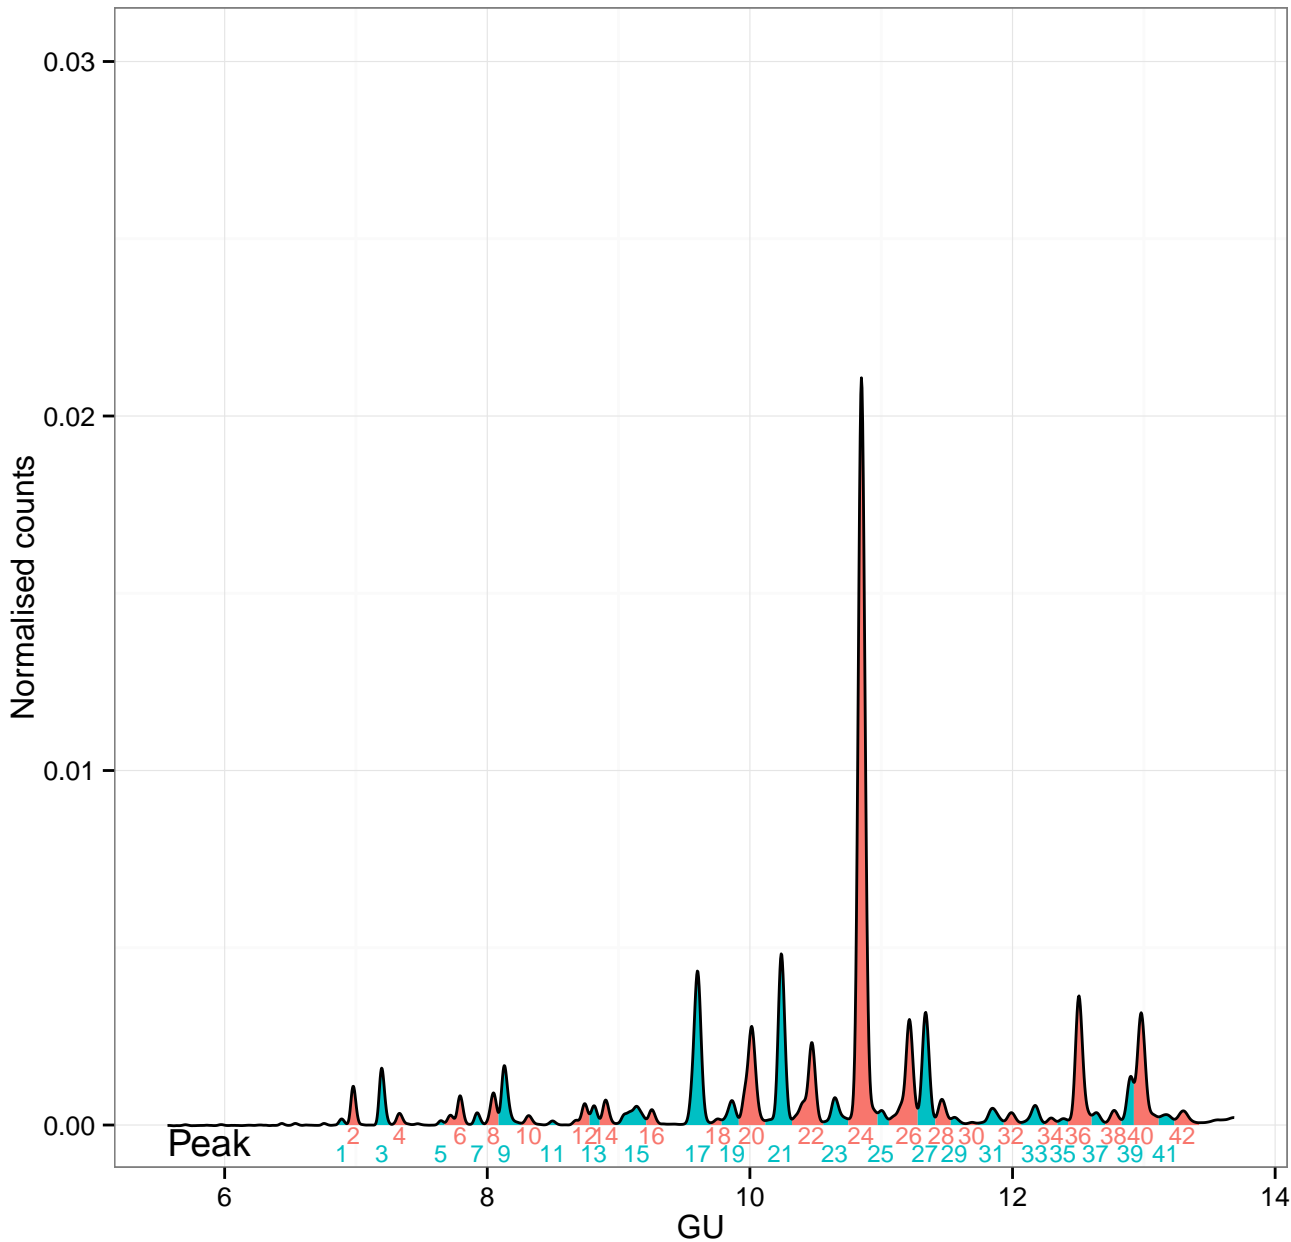

# H-1

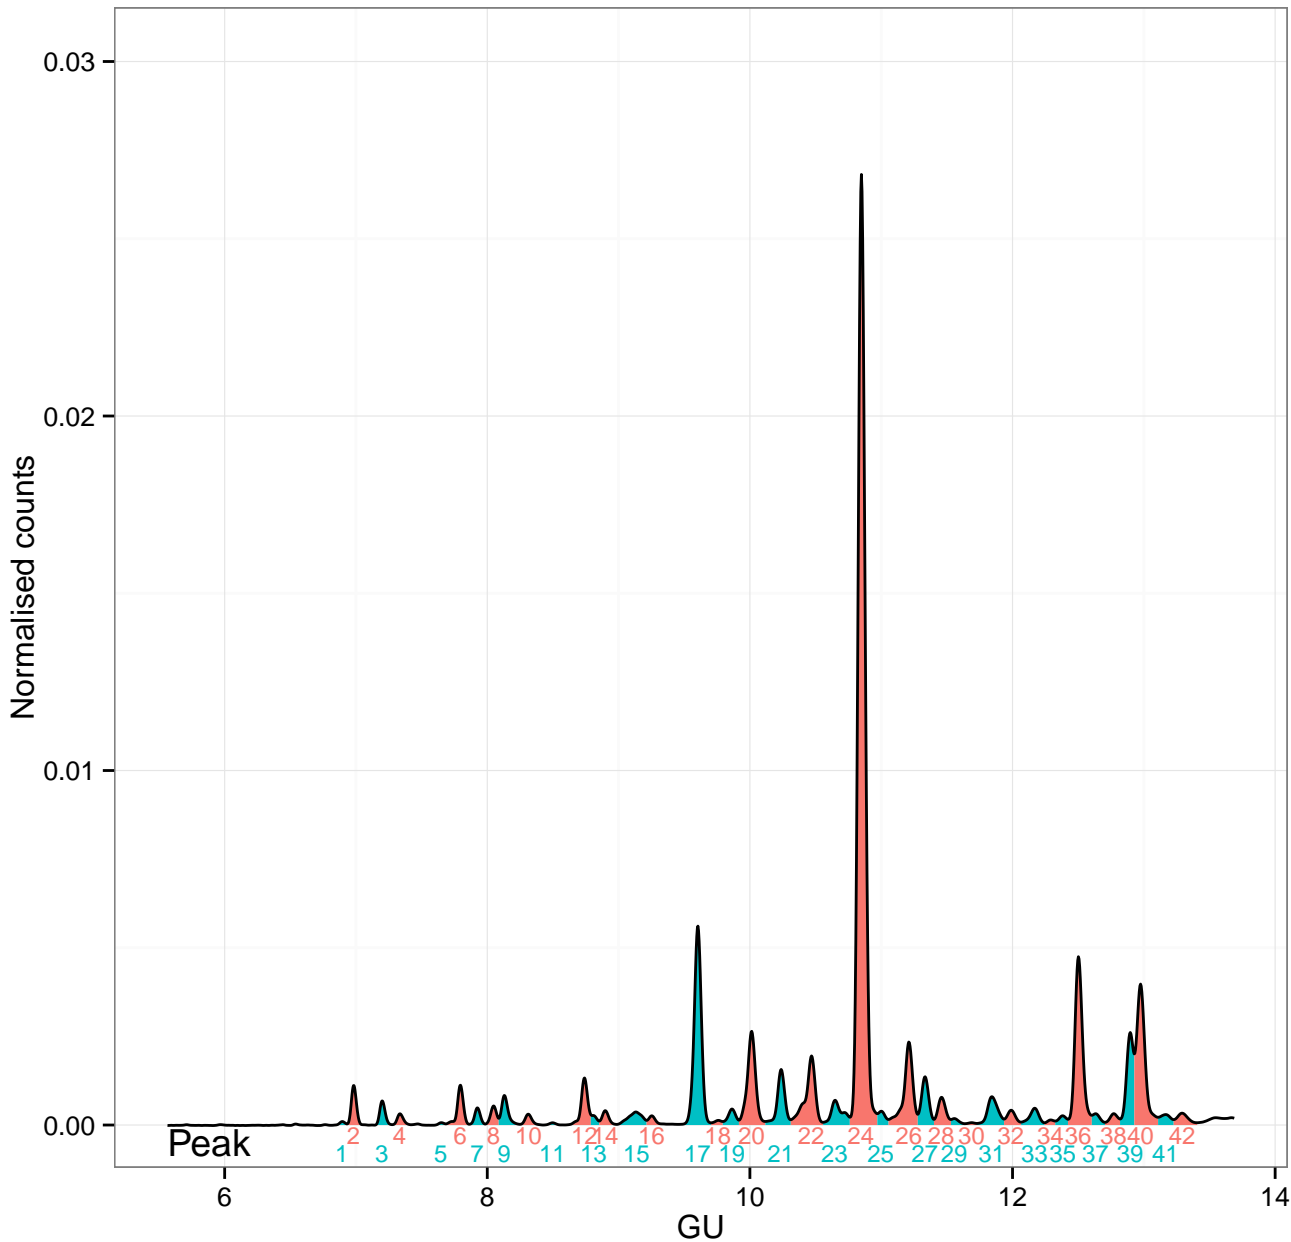

# H-2

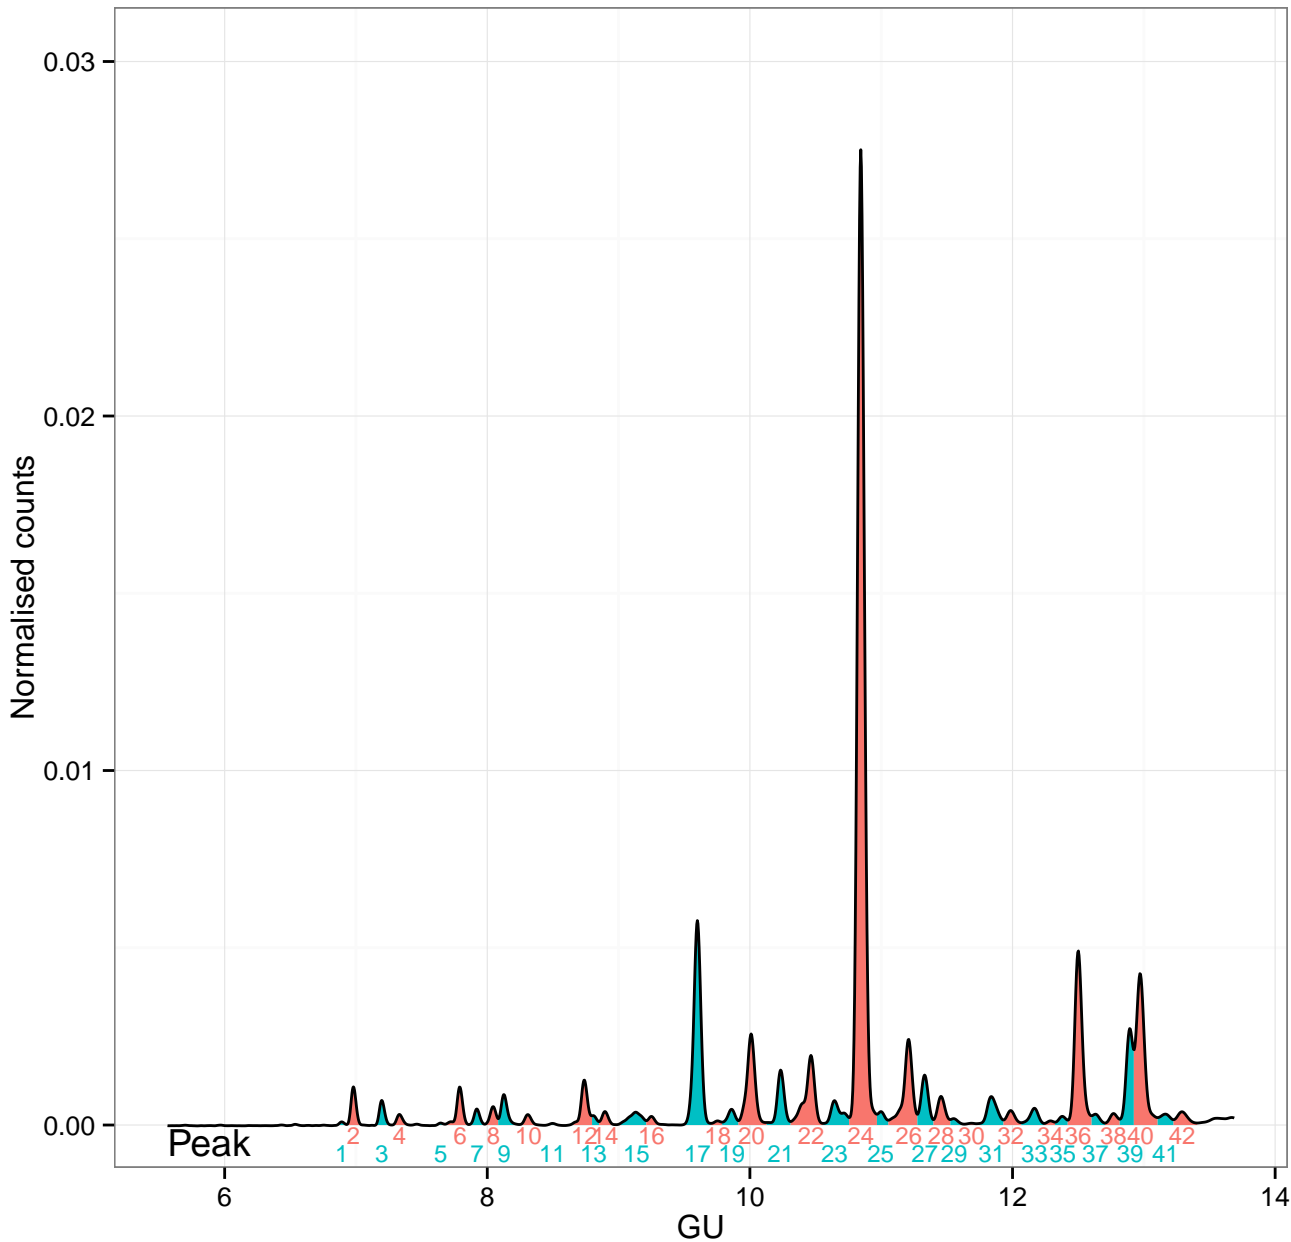

# H-3

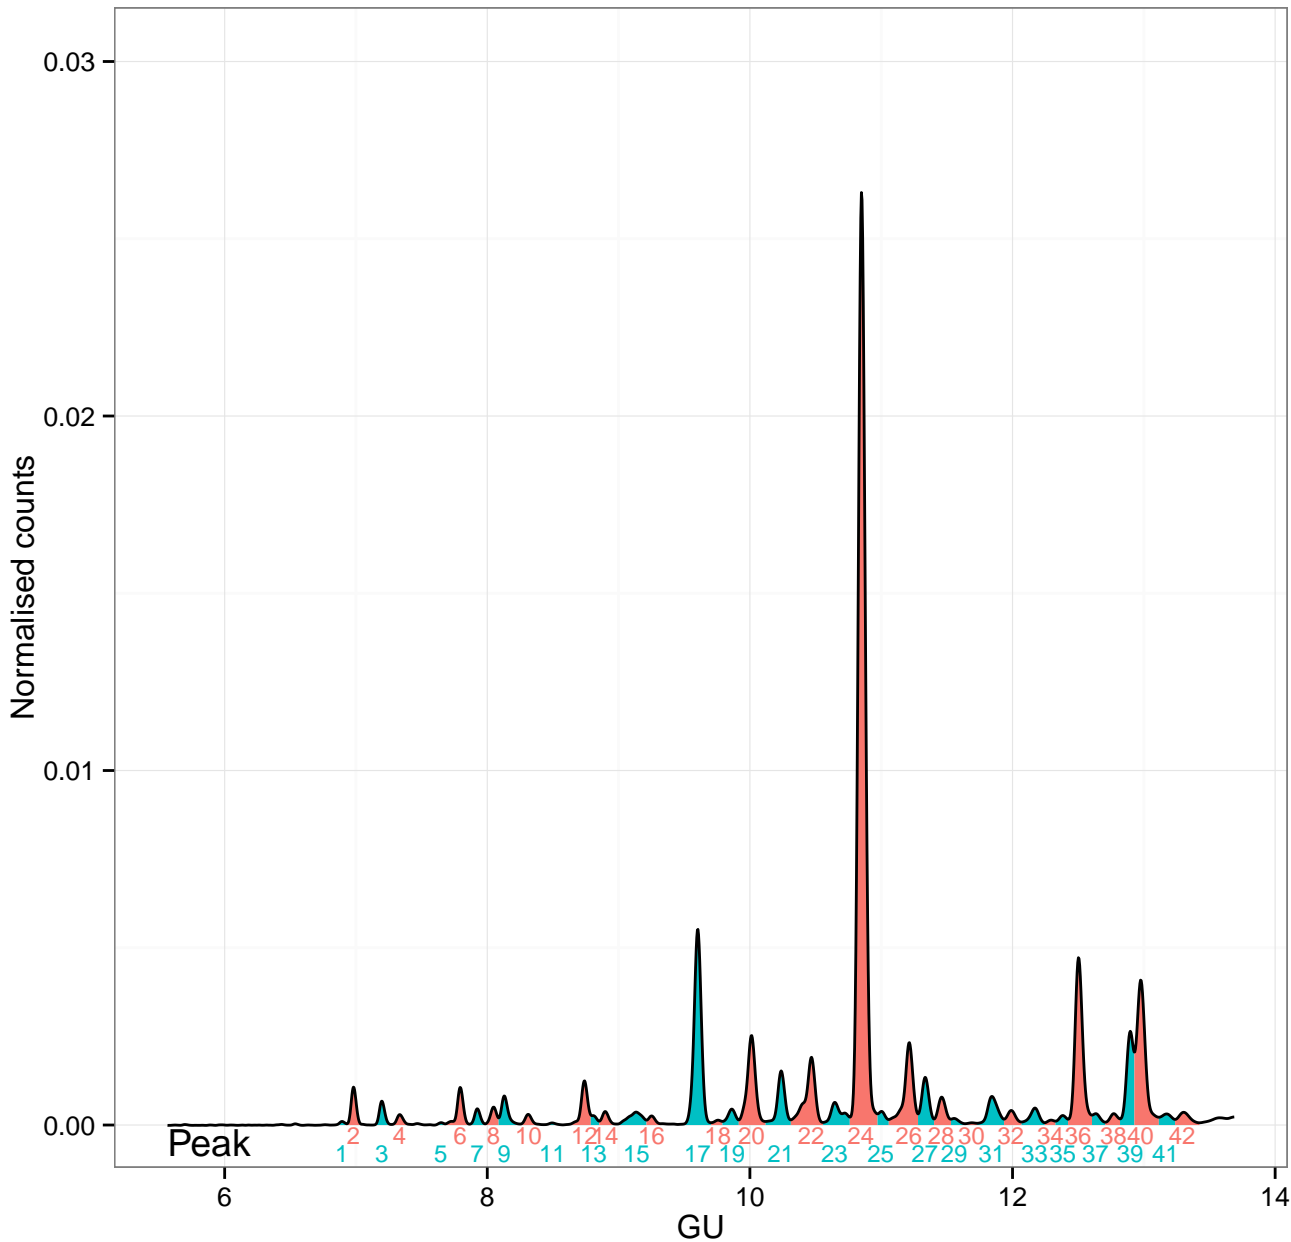

I-1

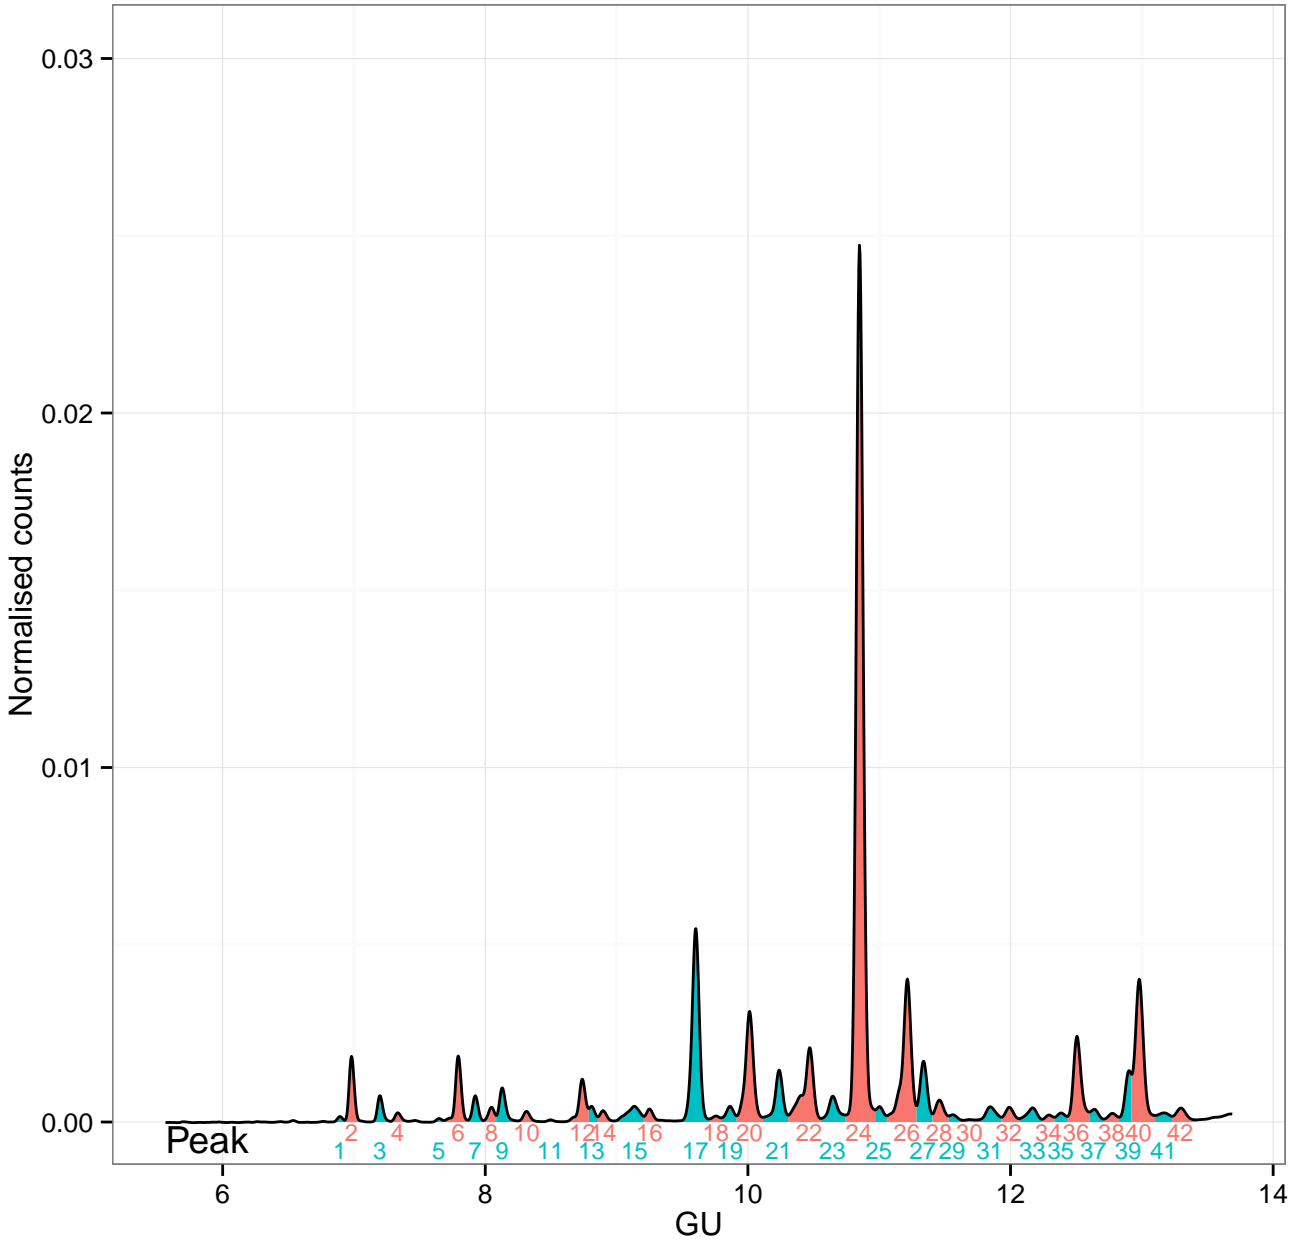

I-2

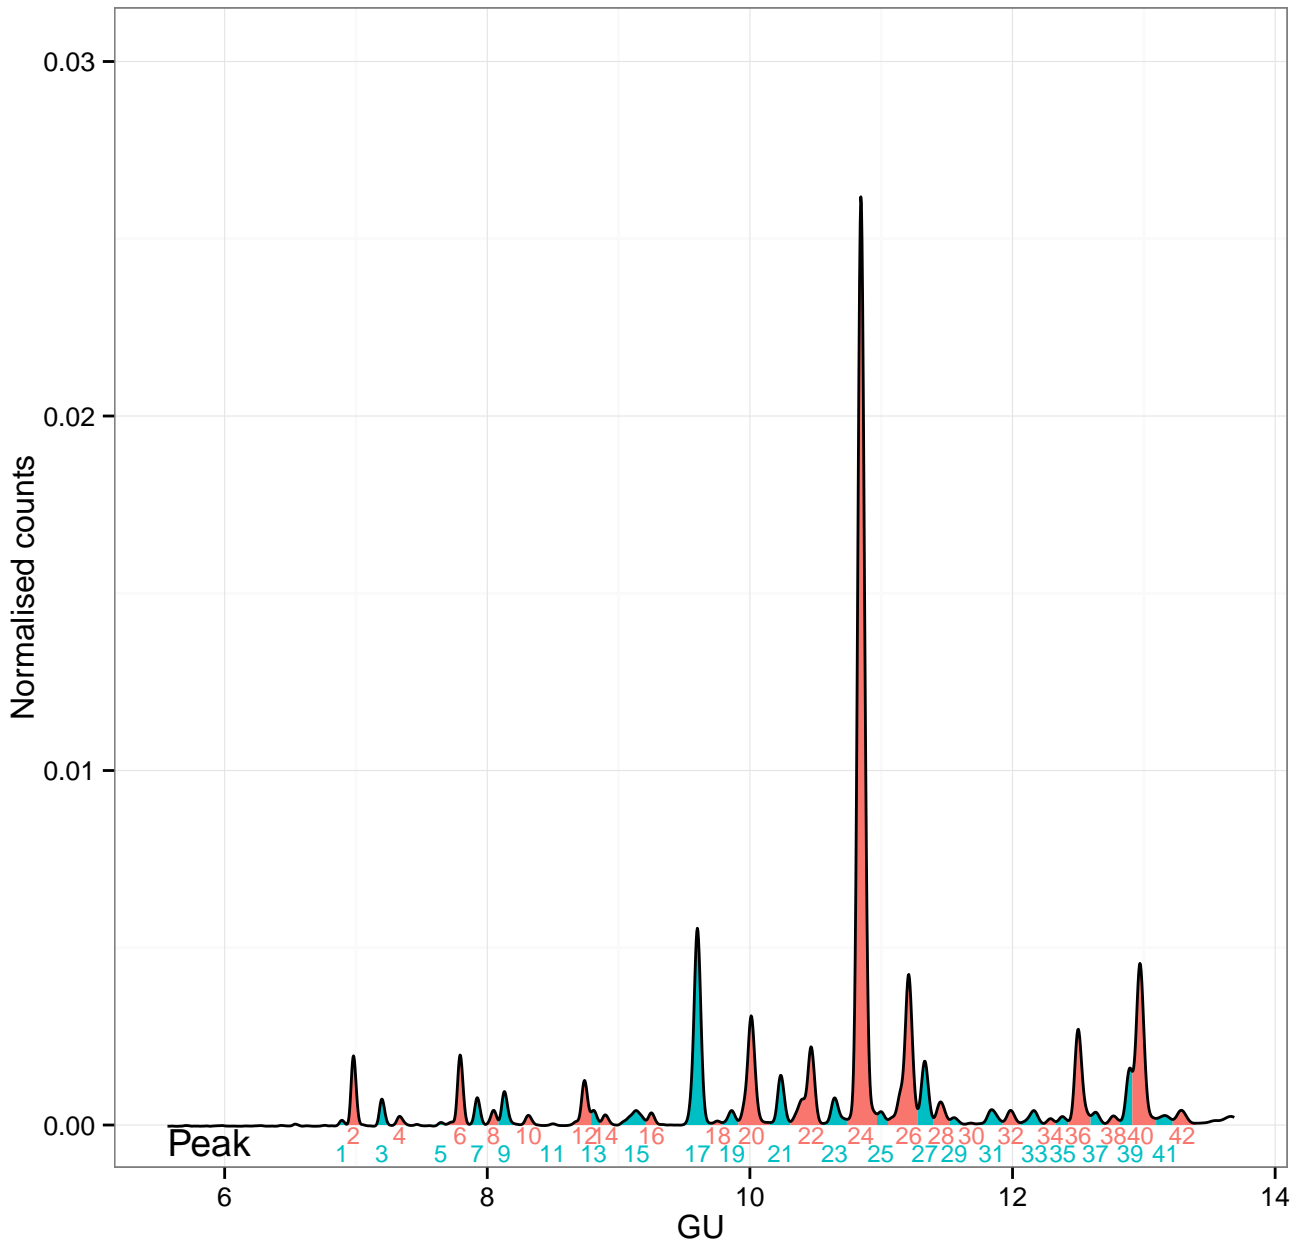



I-3

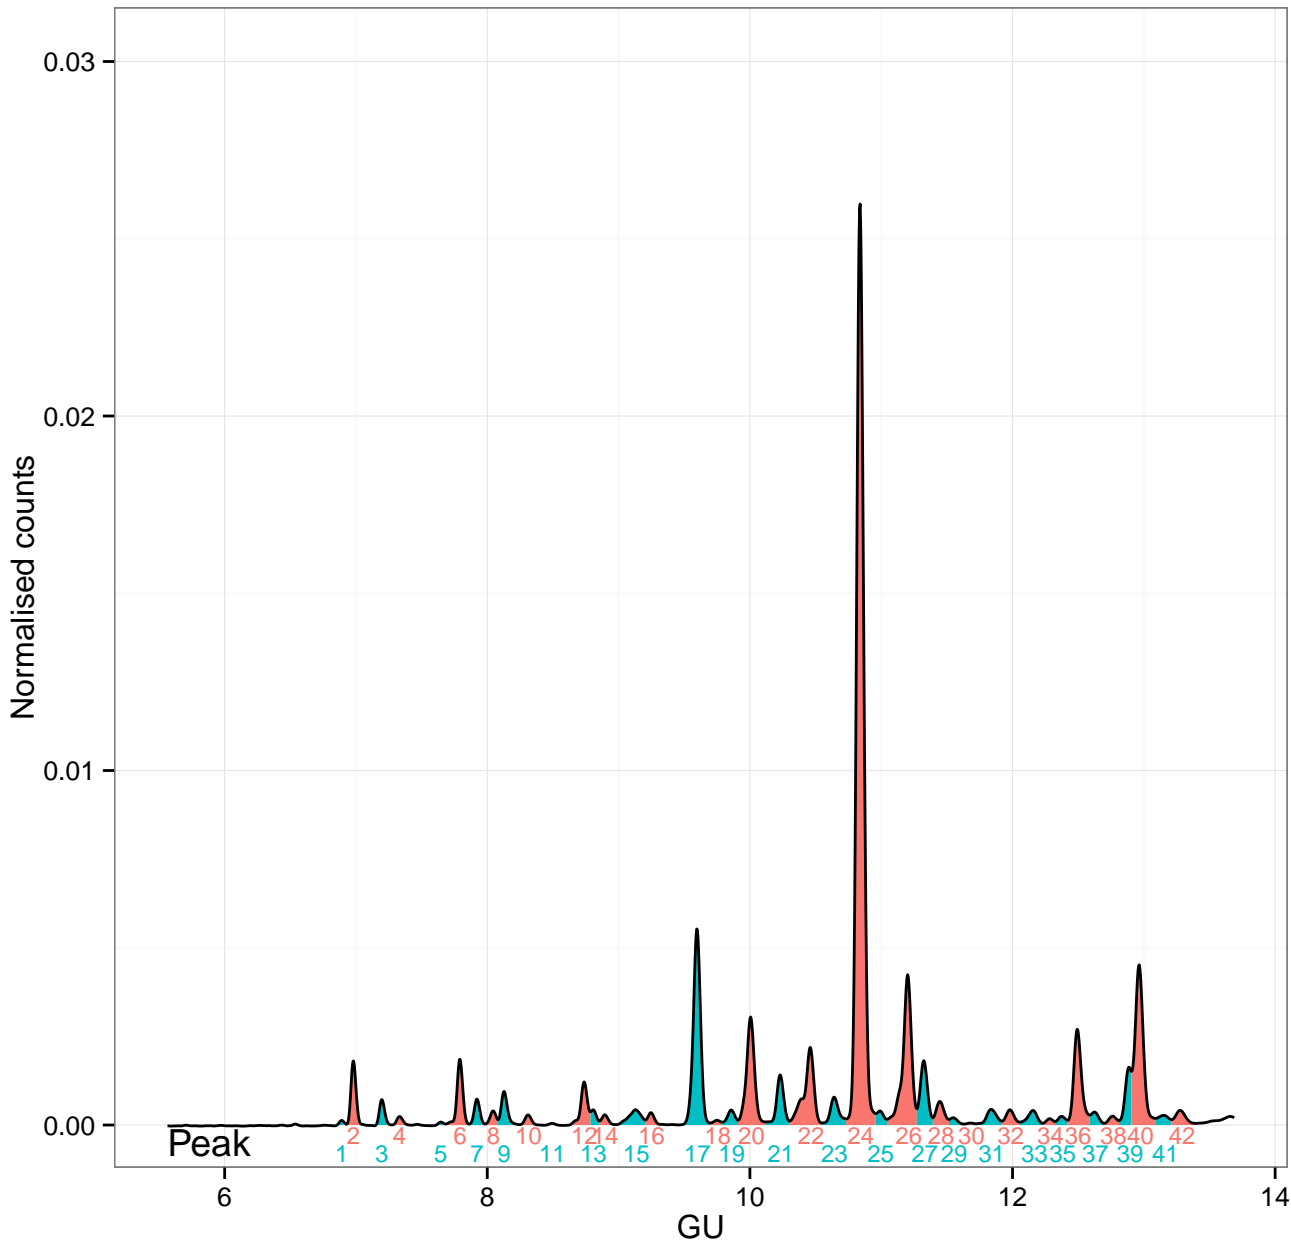

J-1

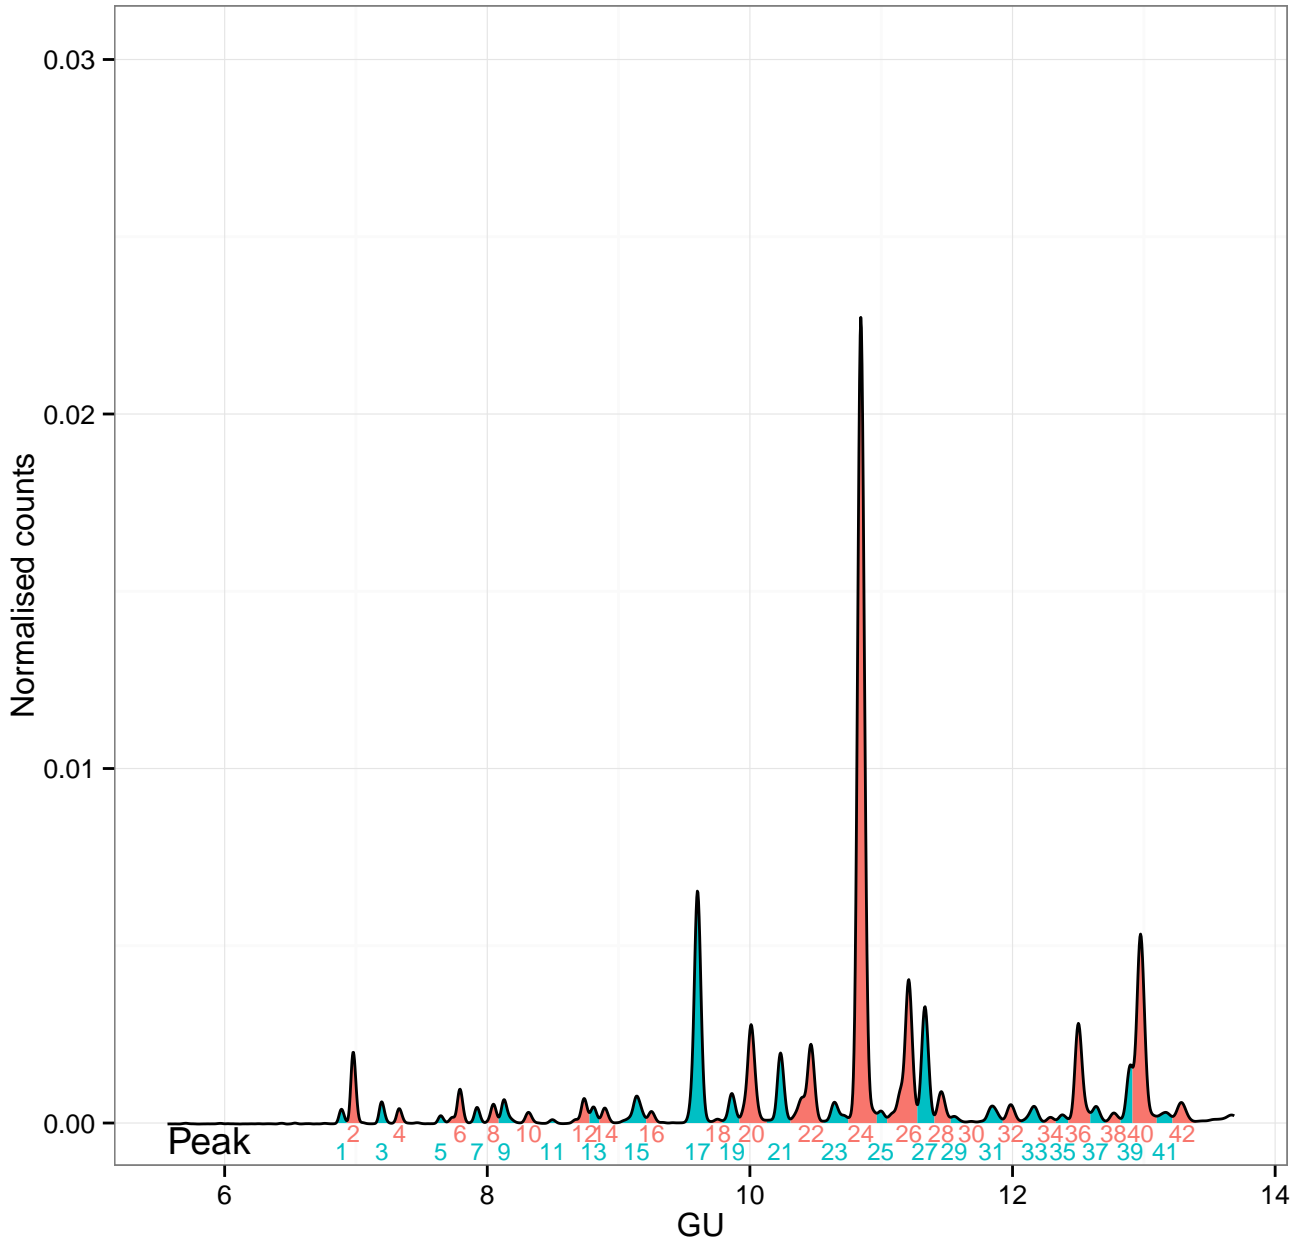

J-3

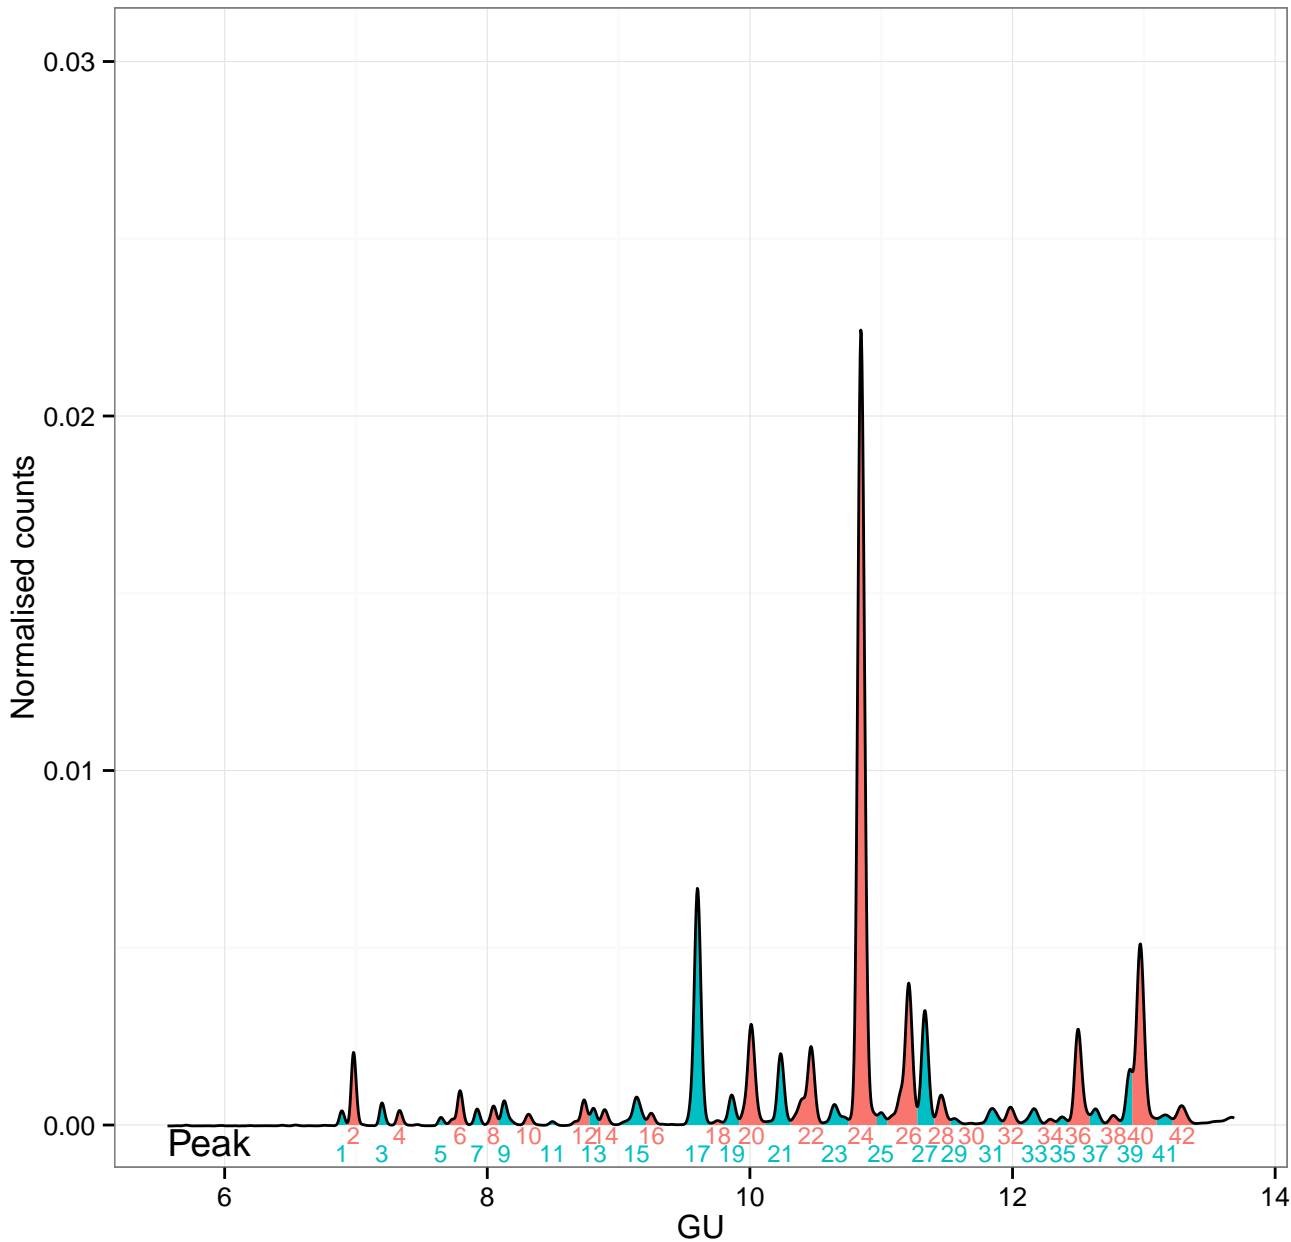

K-1

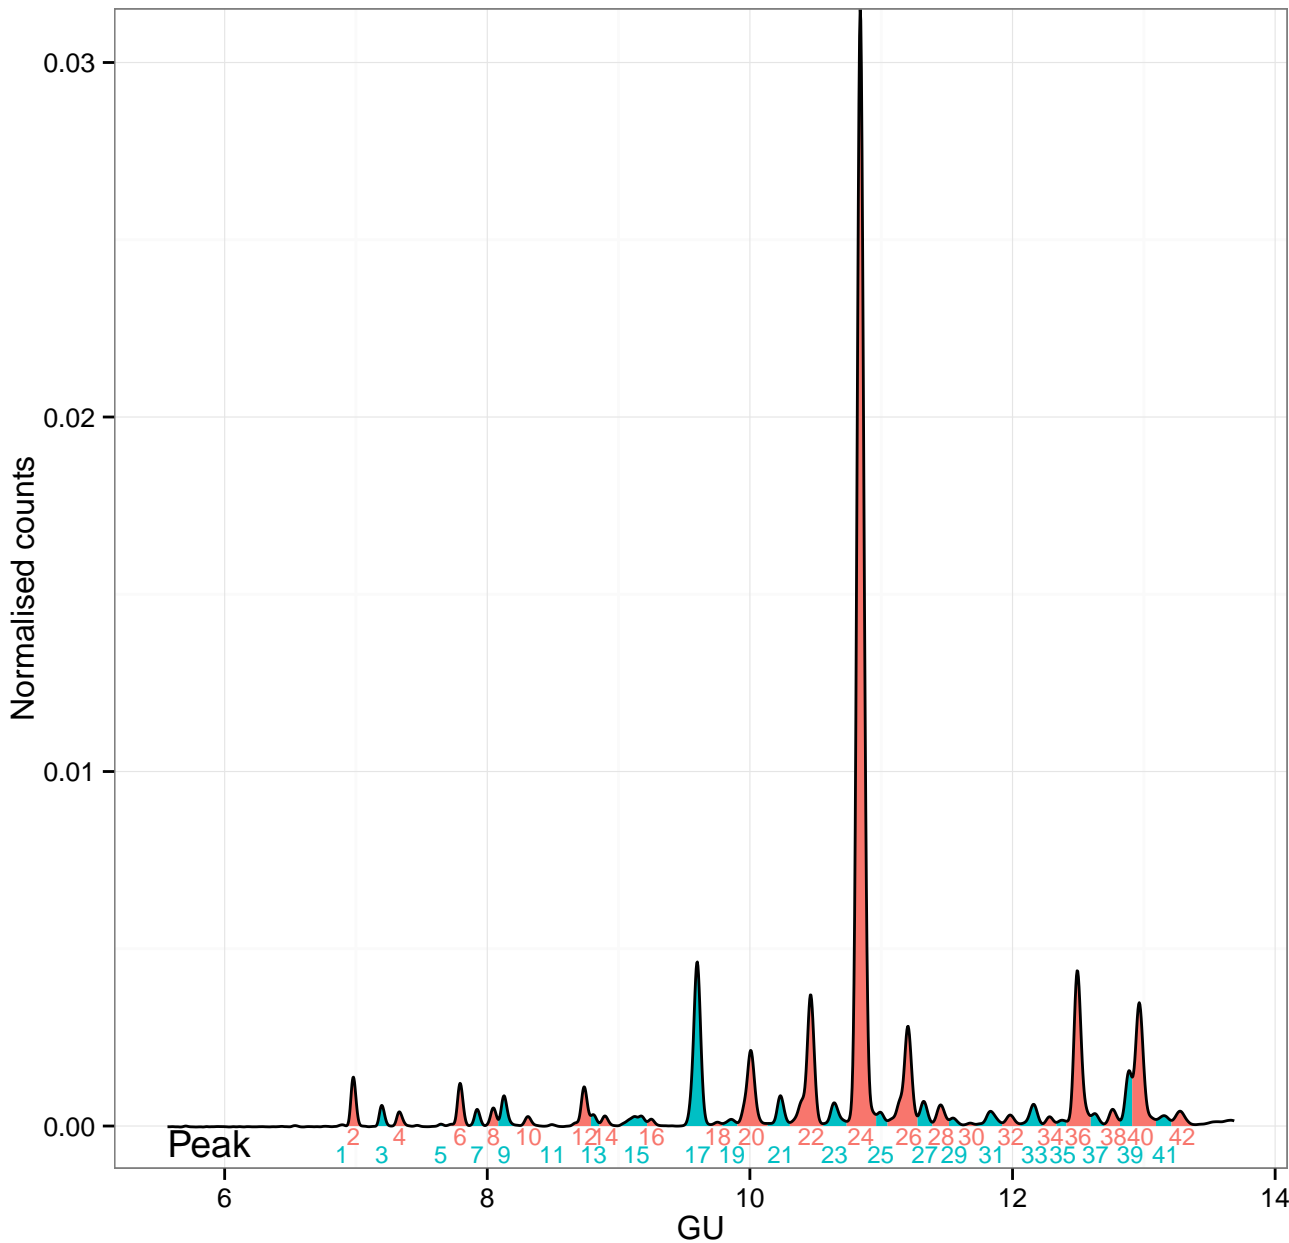

# K-2

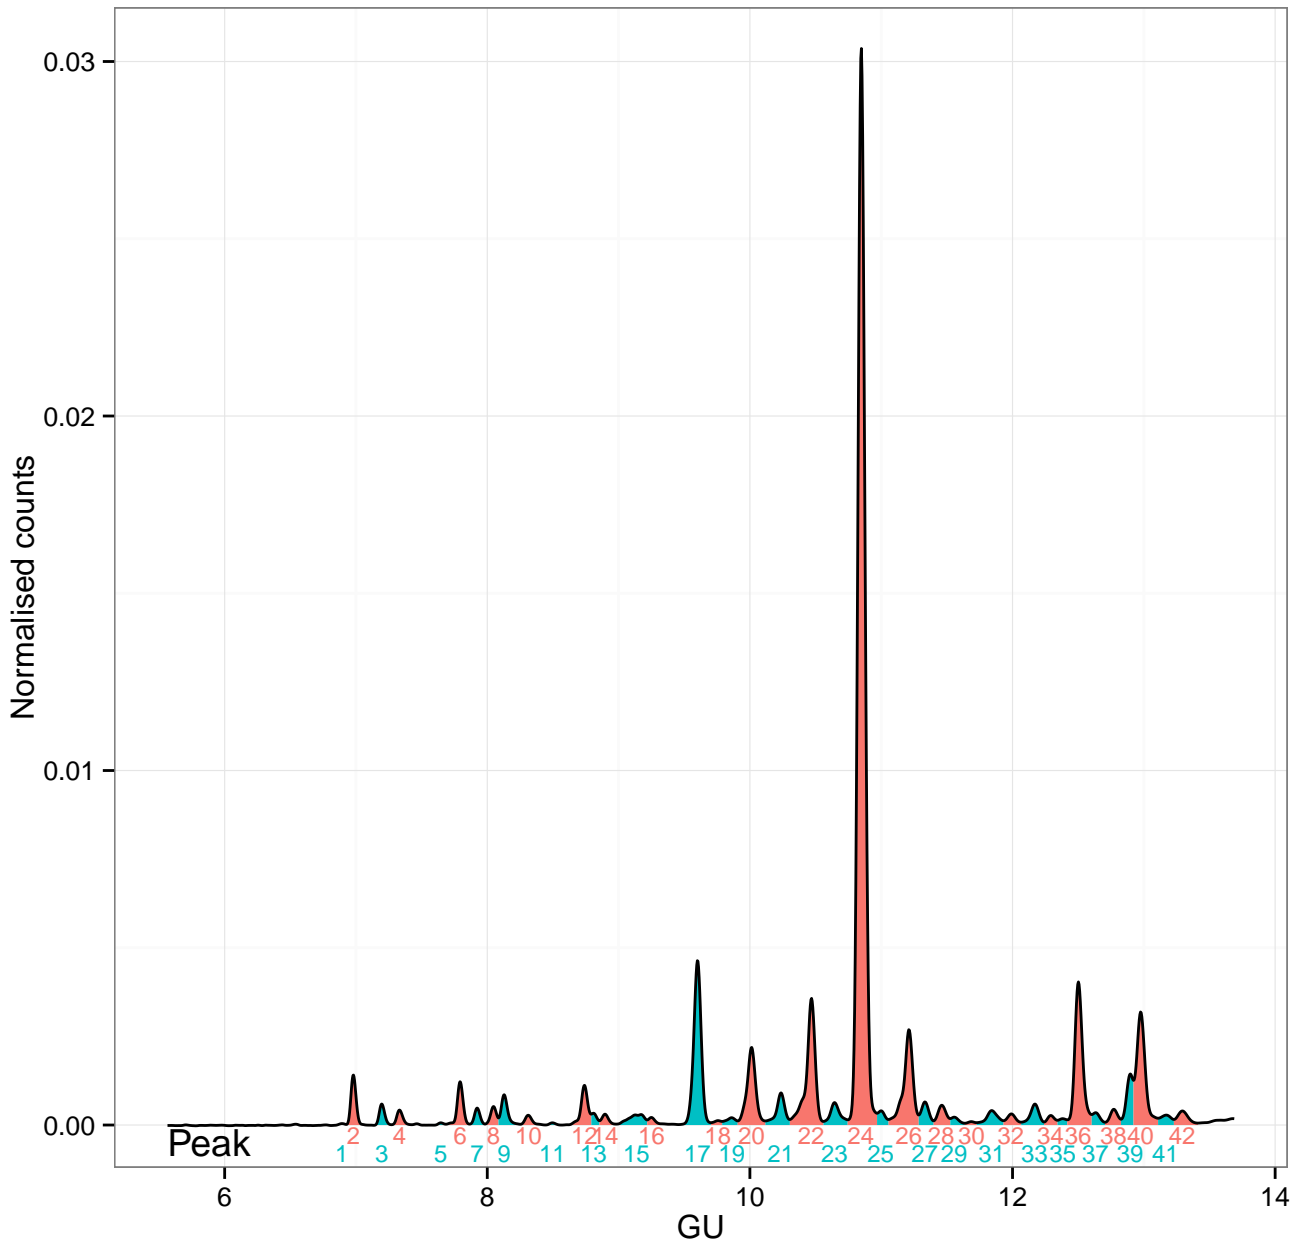

# K-3

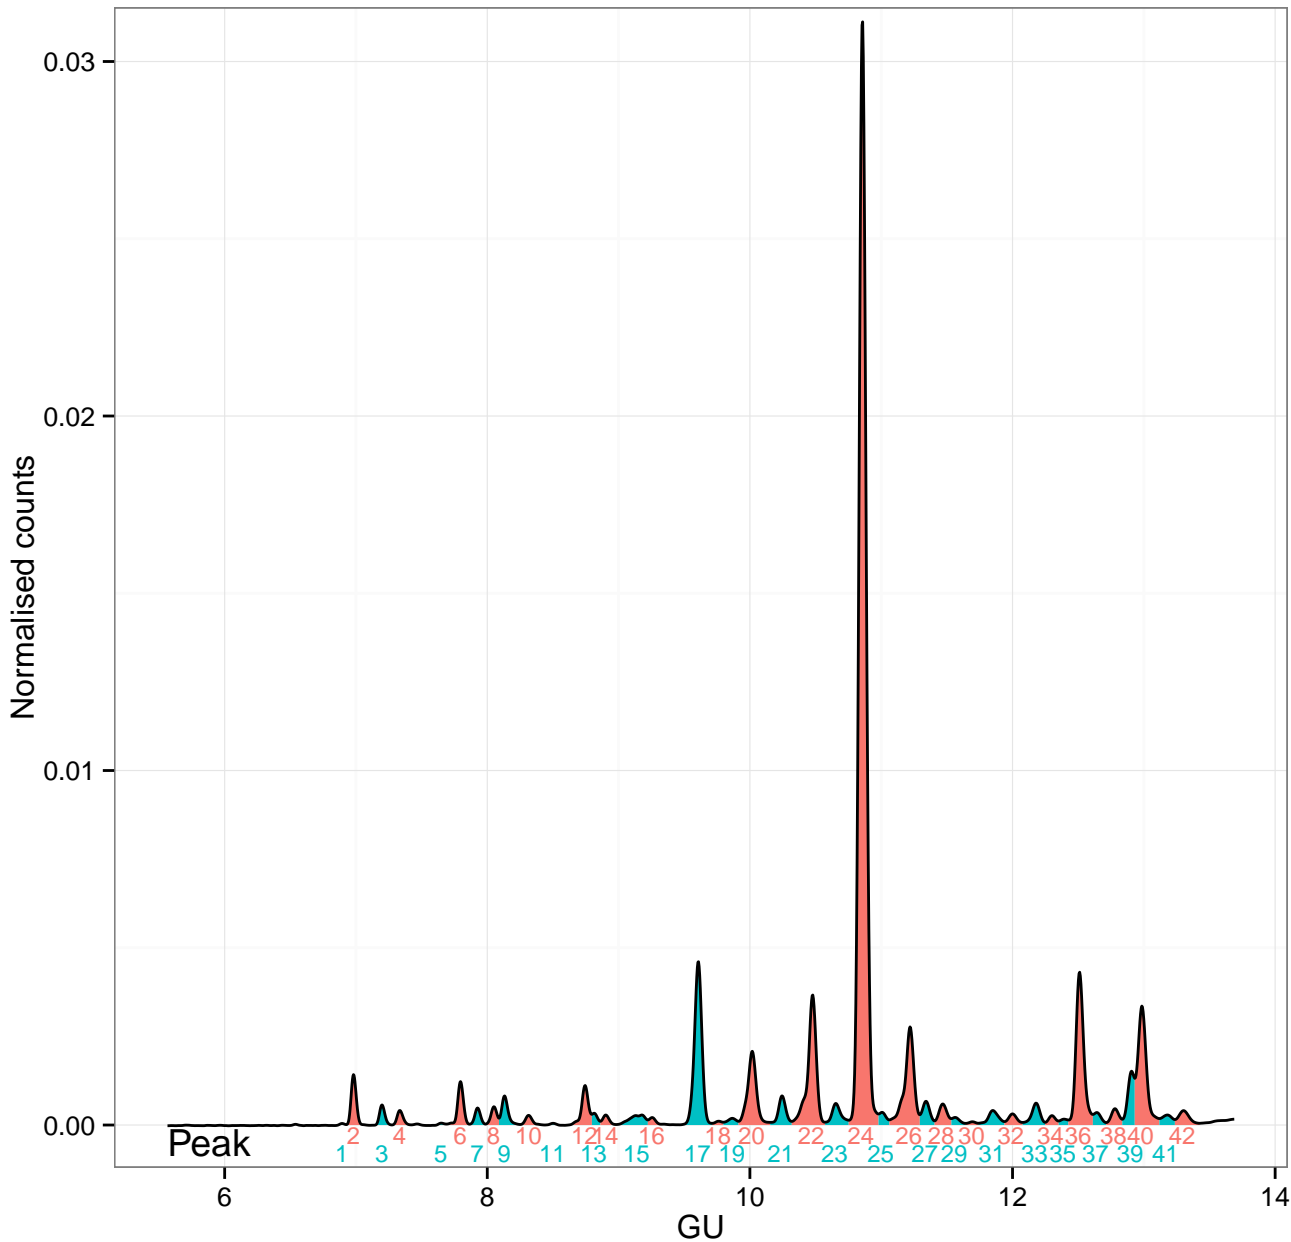

L-1

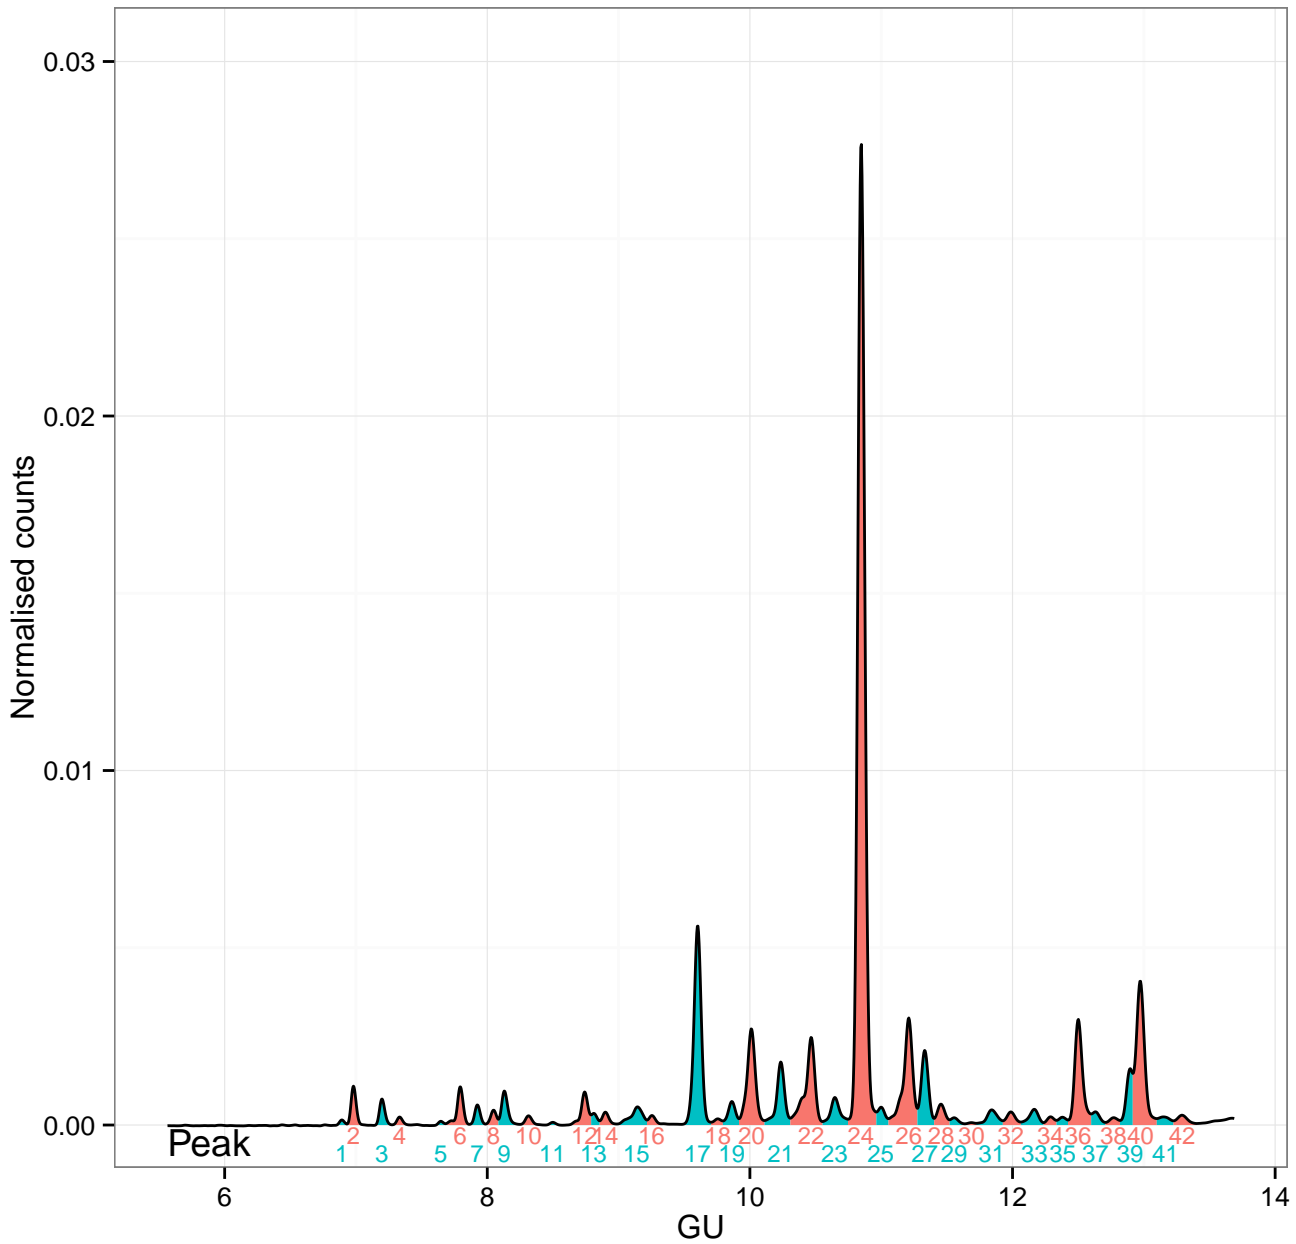

# L-3

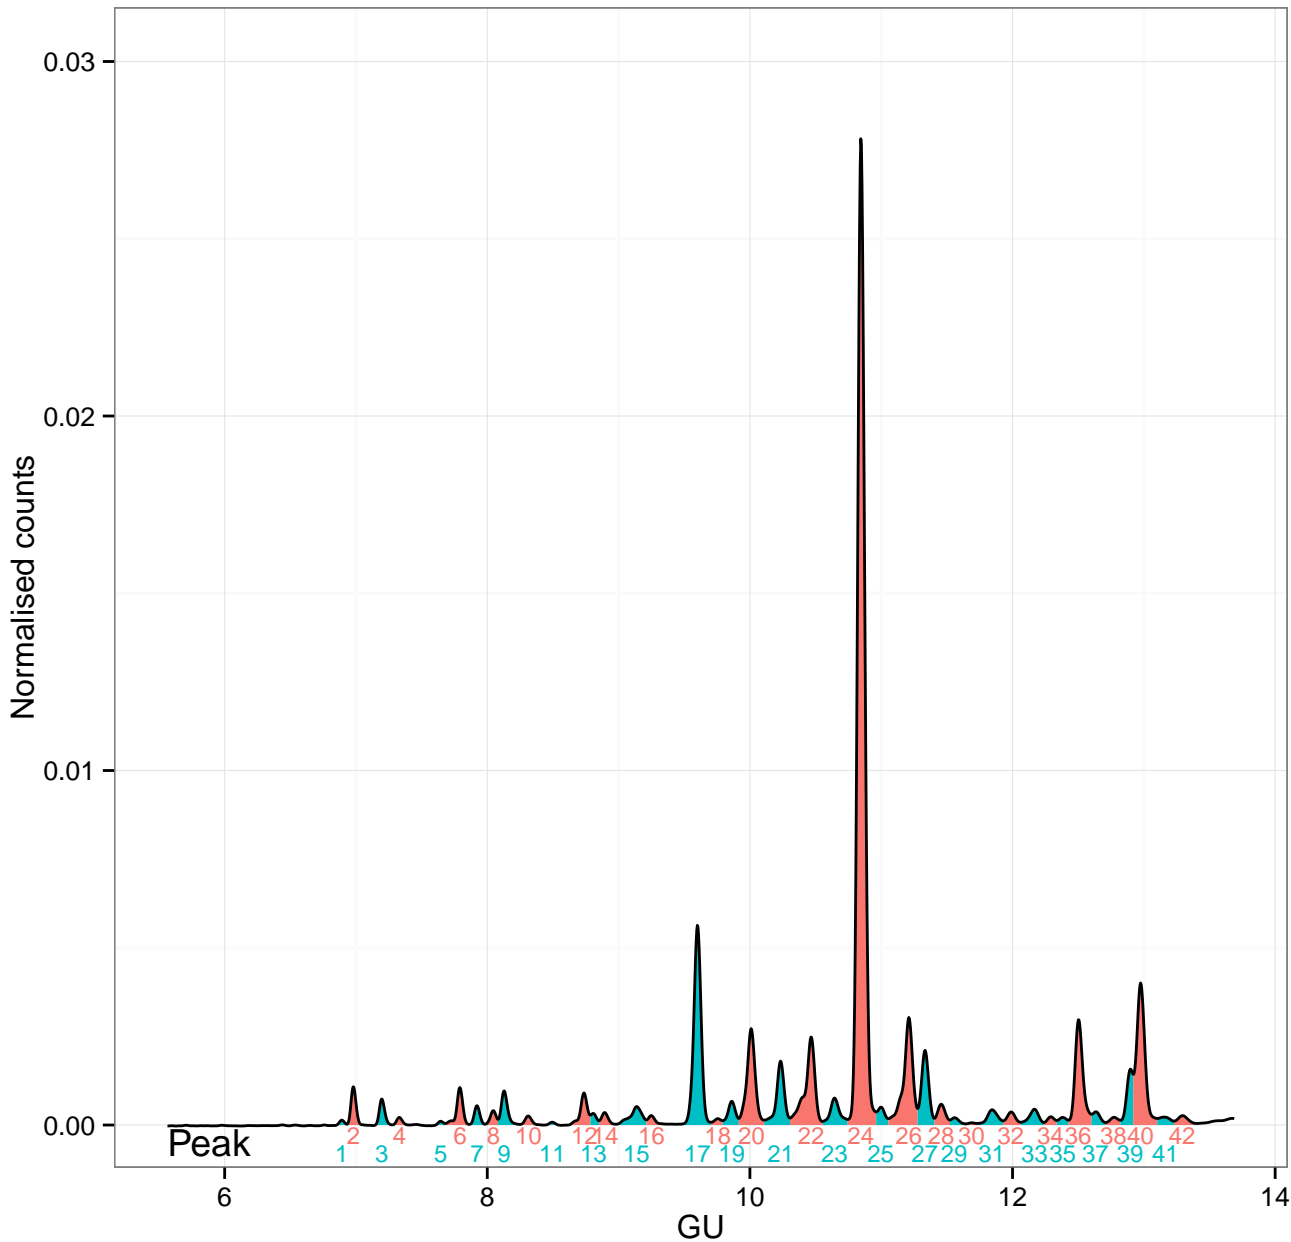



# M-1

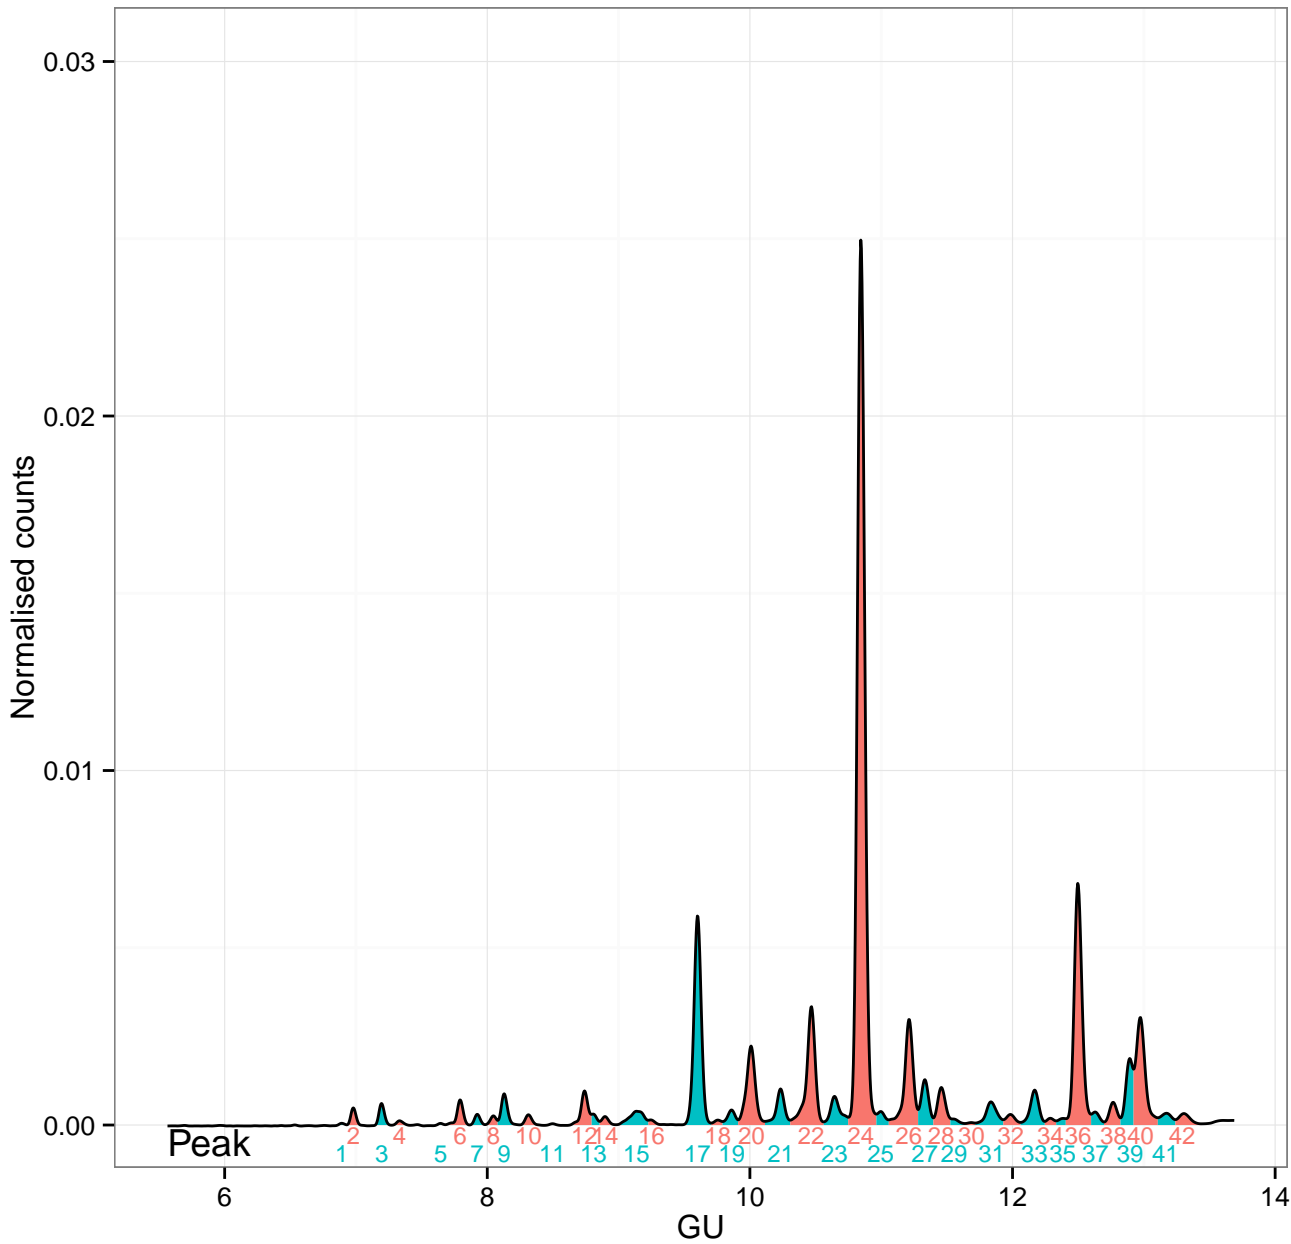

# M-2

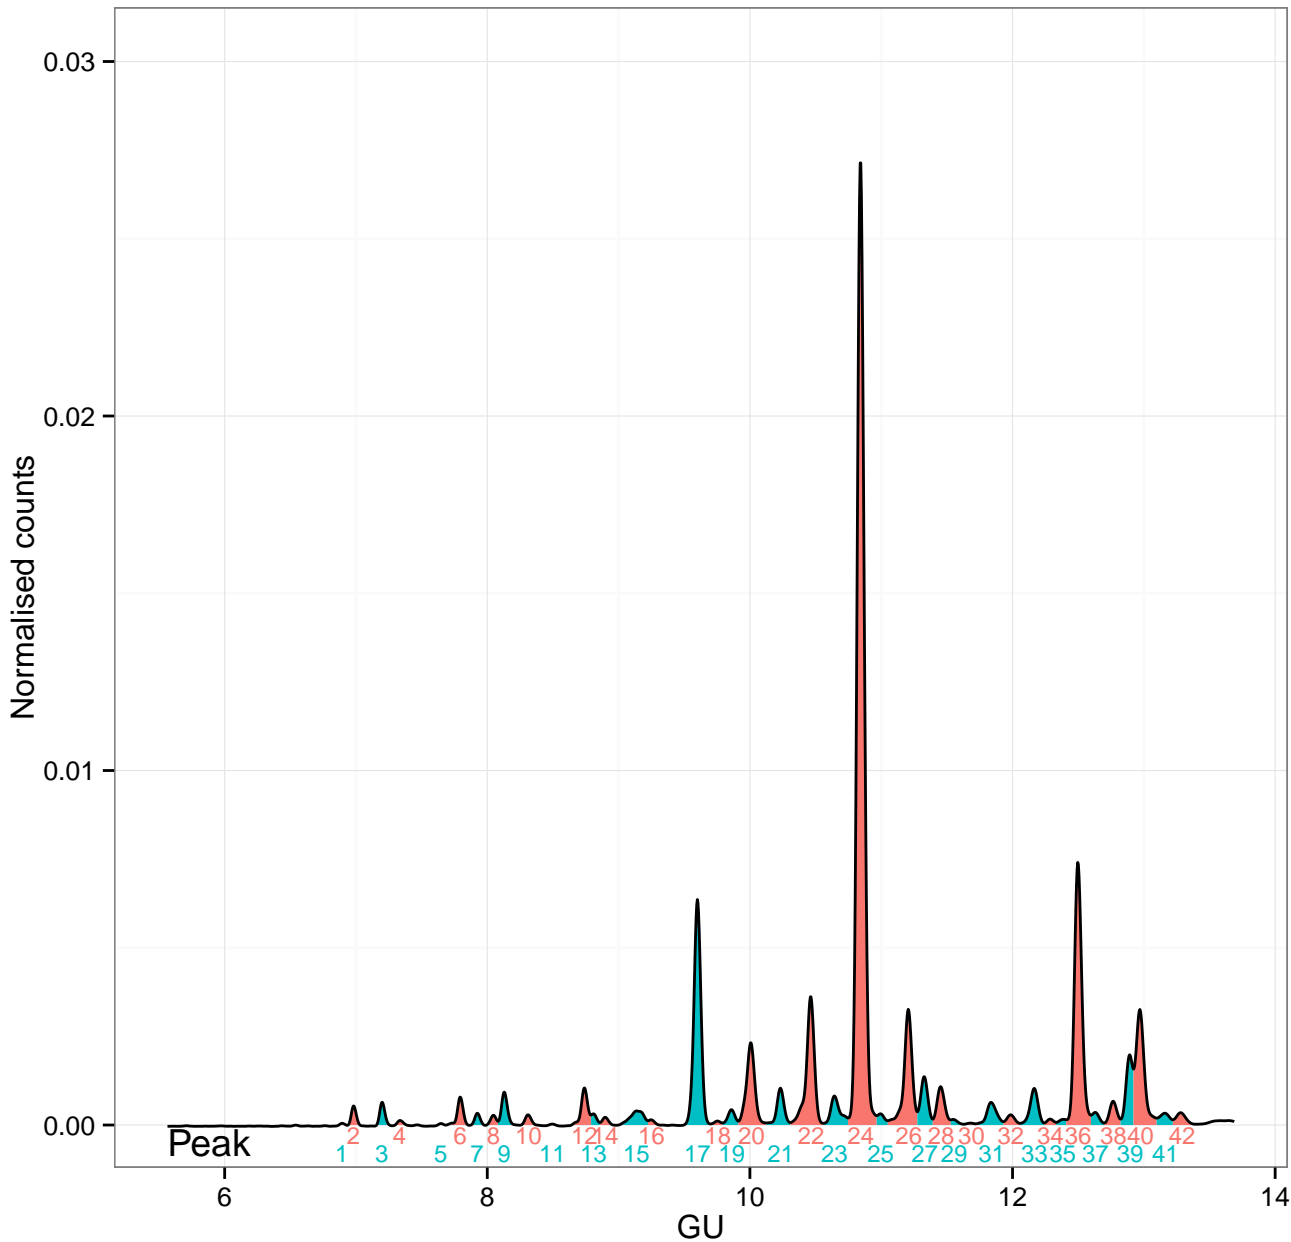

# M-3

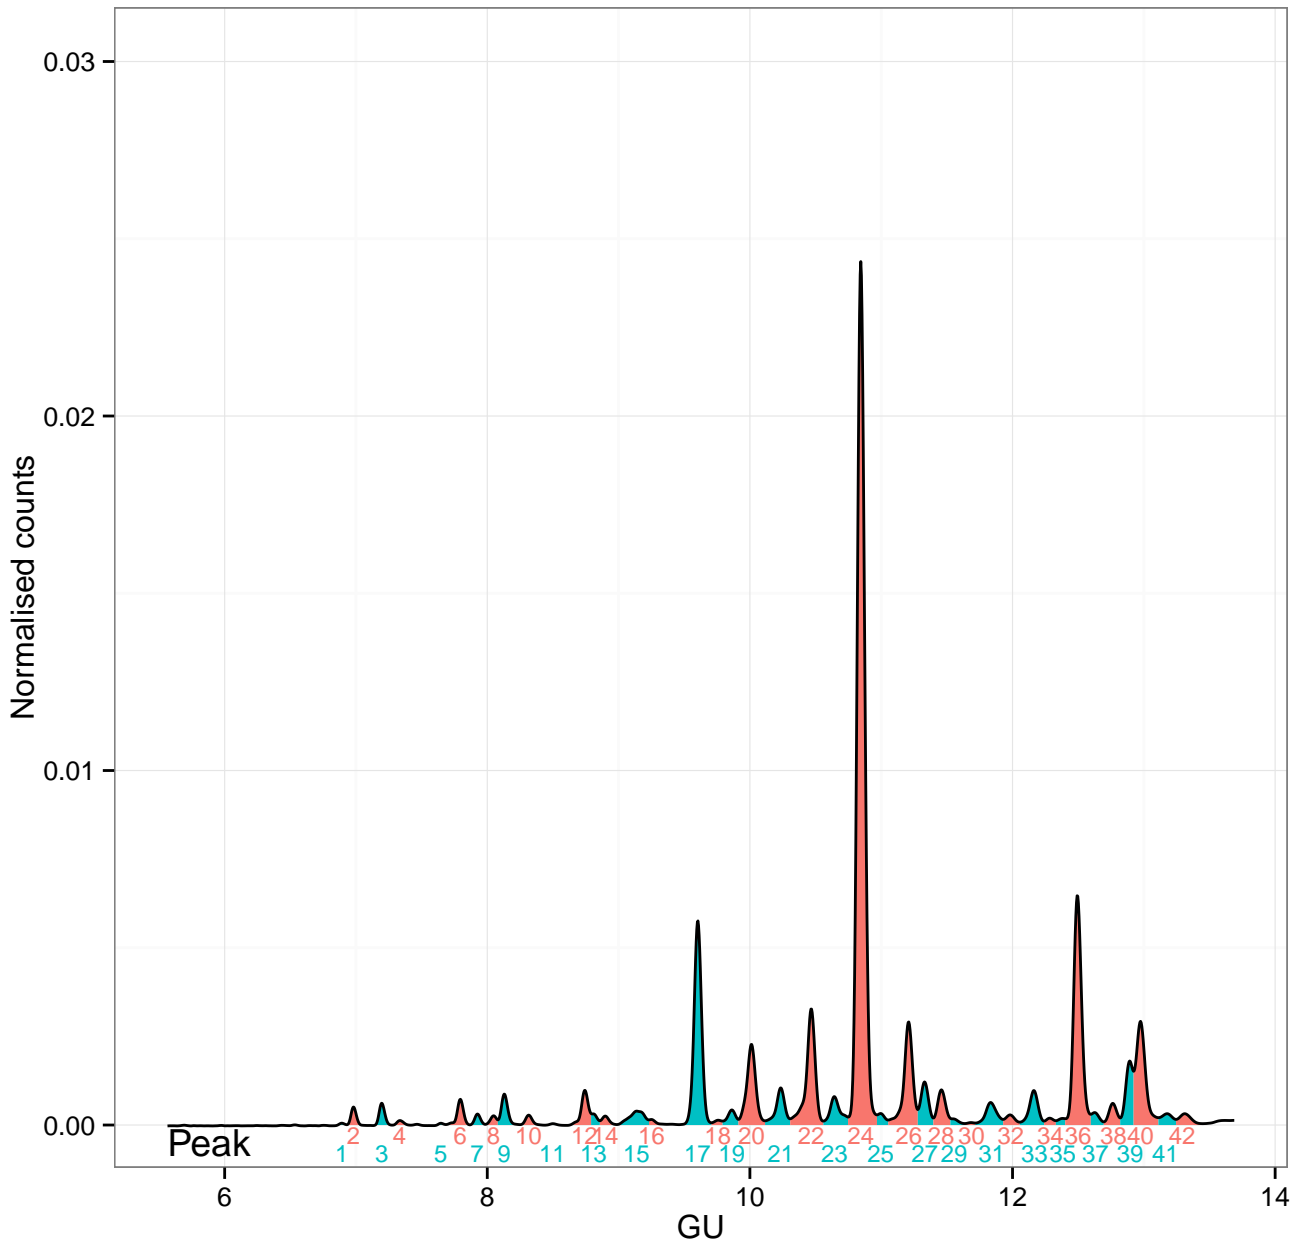

N-1

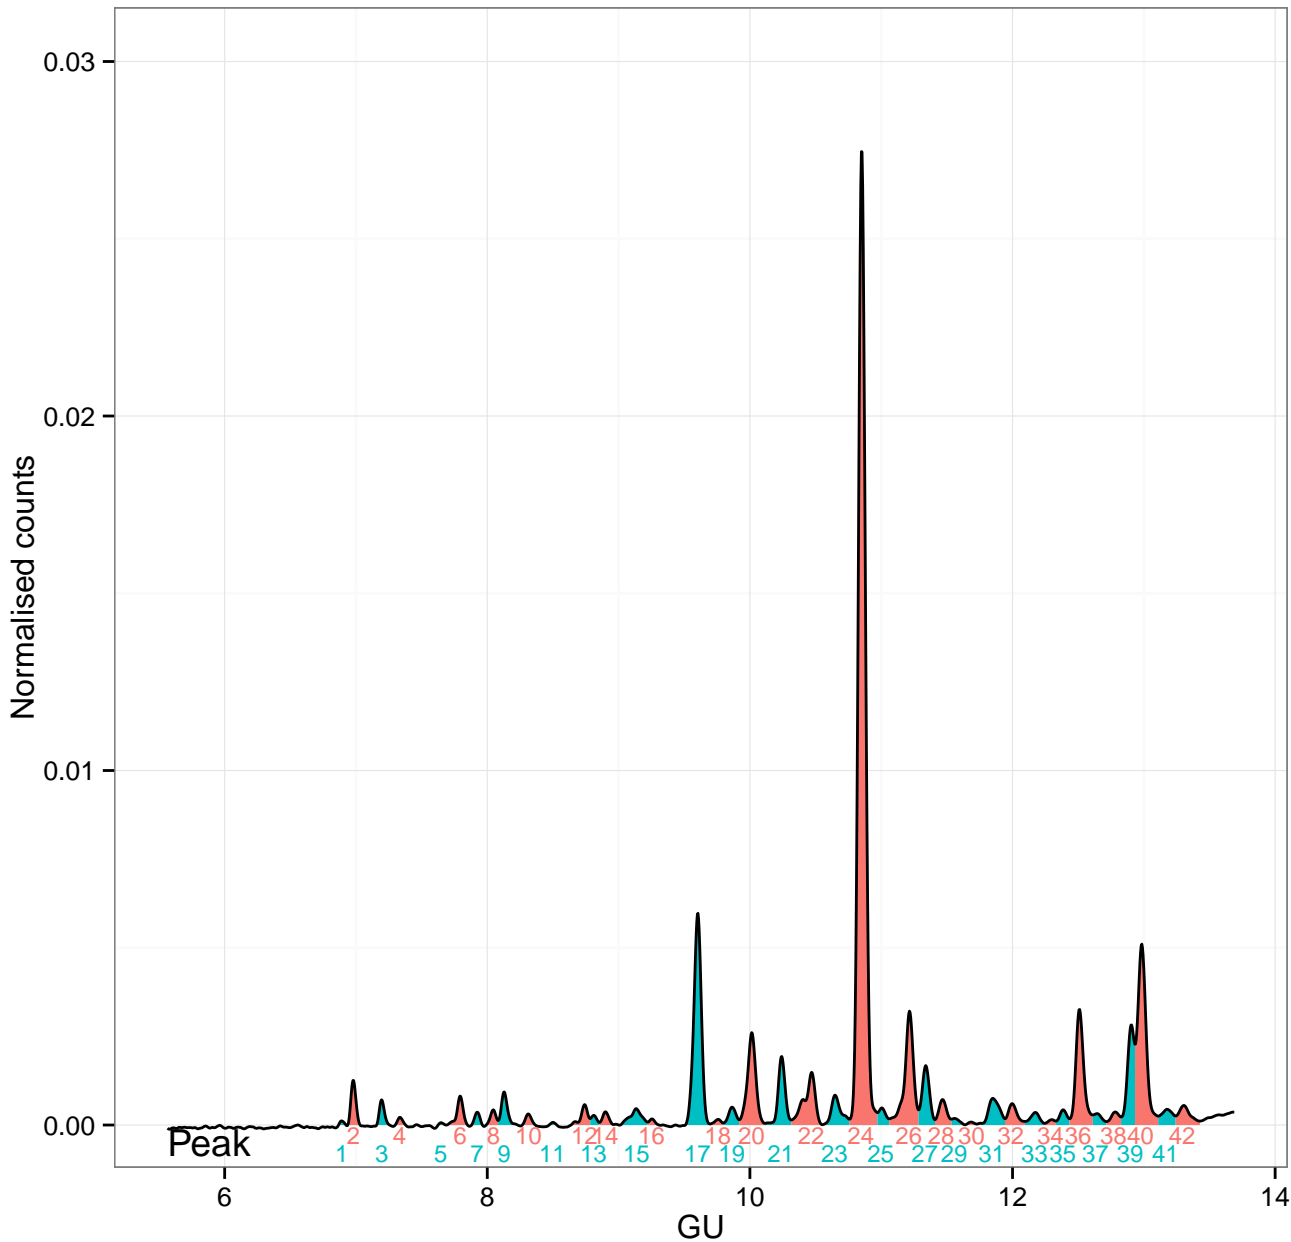

N-3

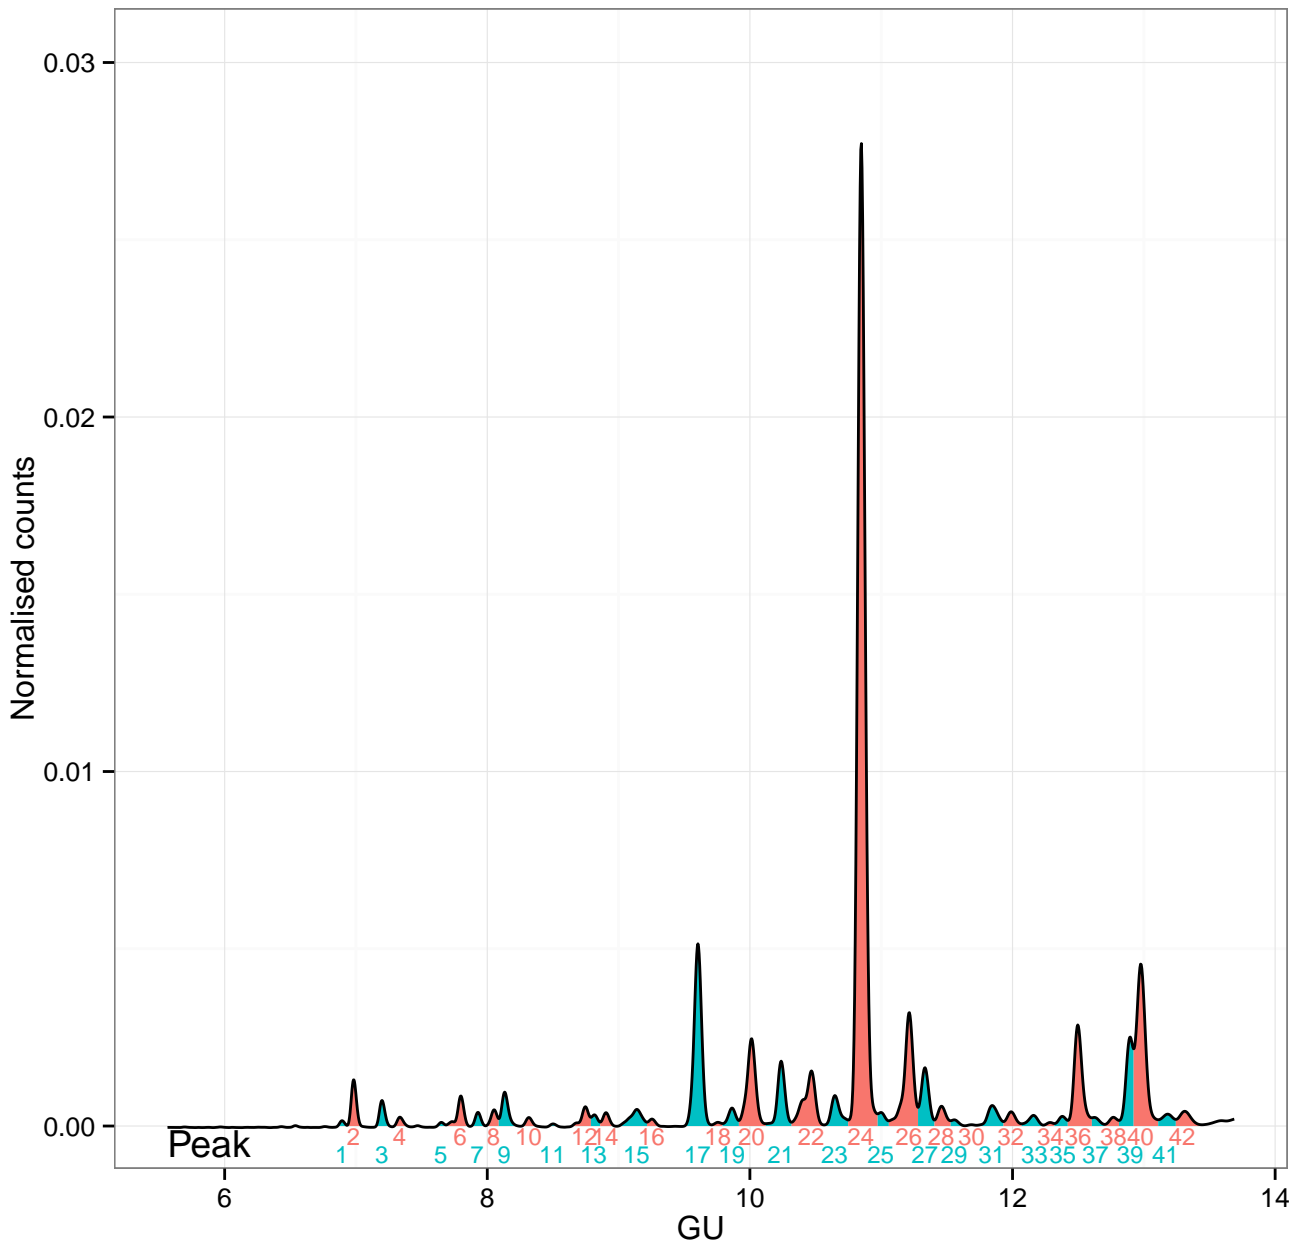

O-1

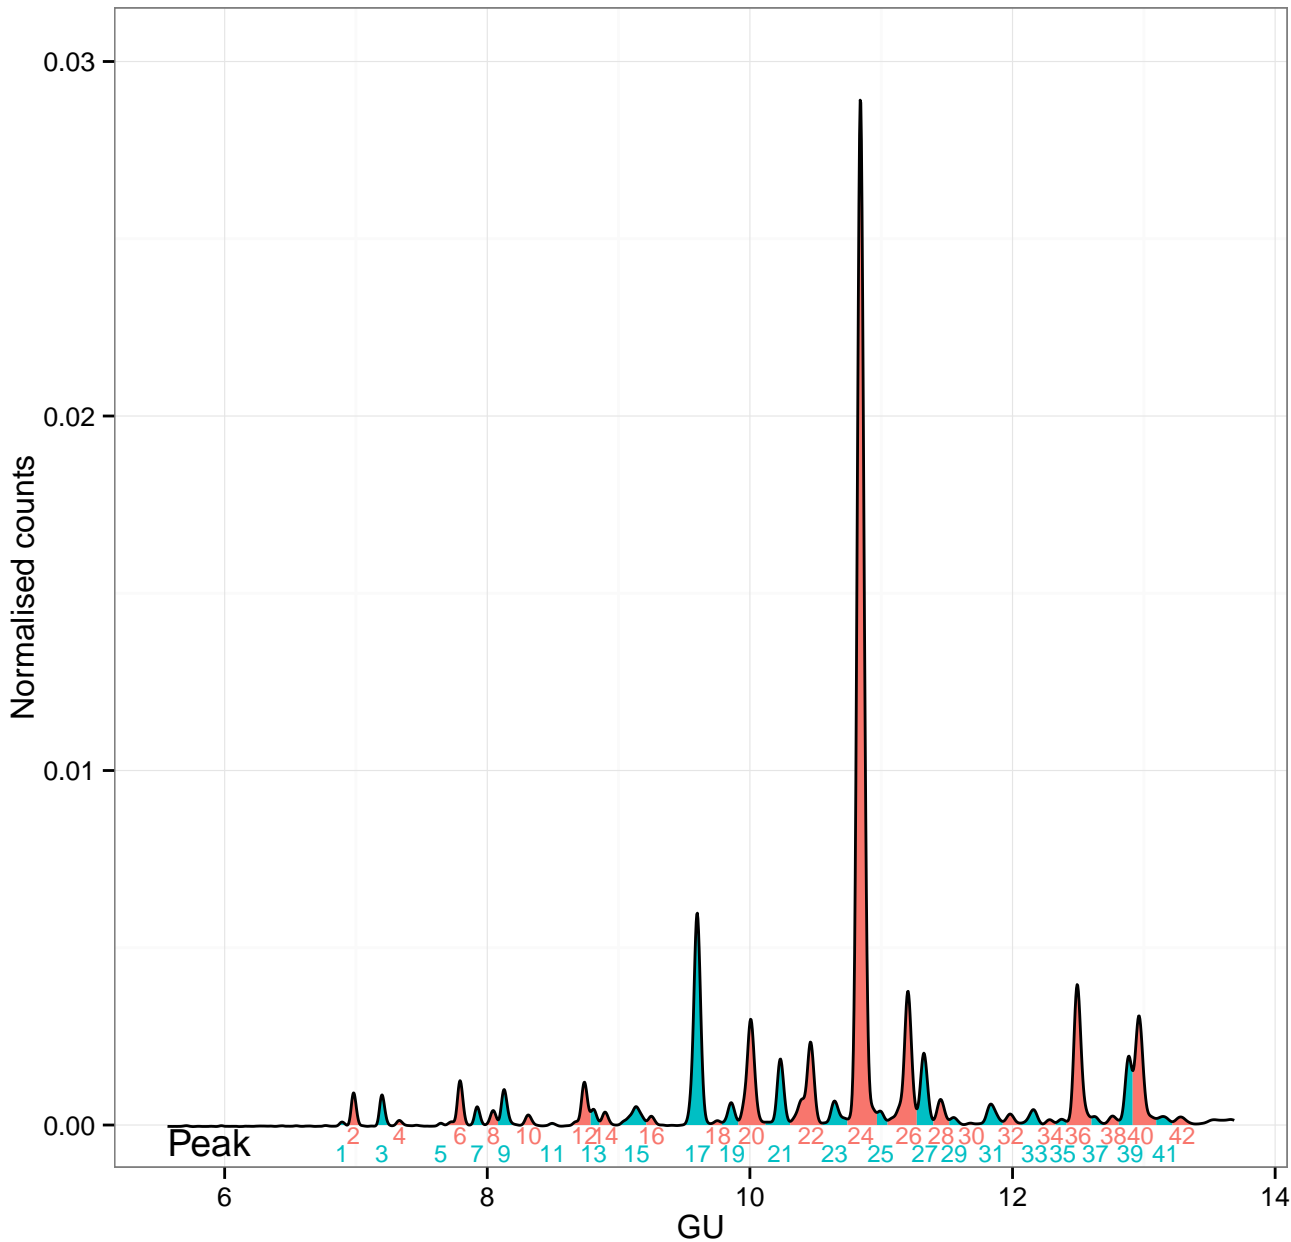

O-2

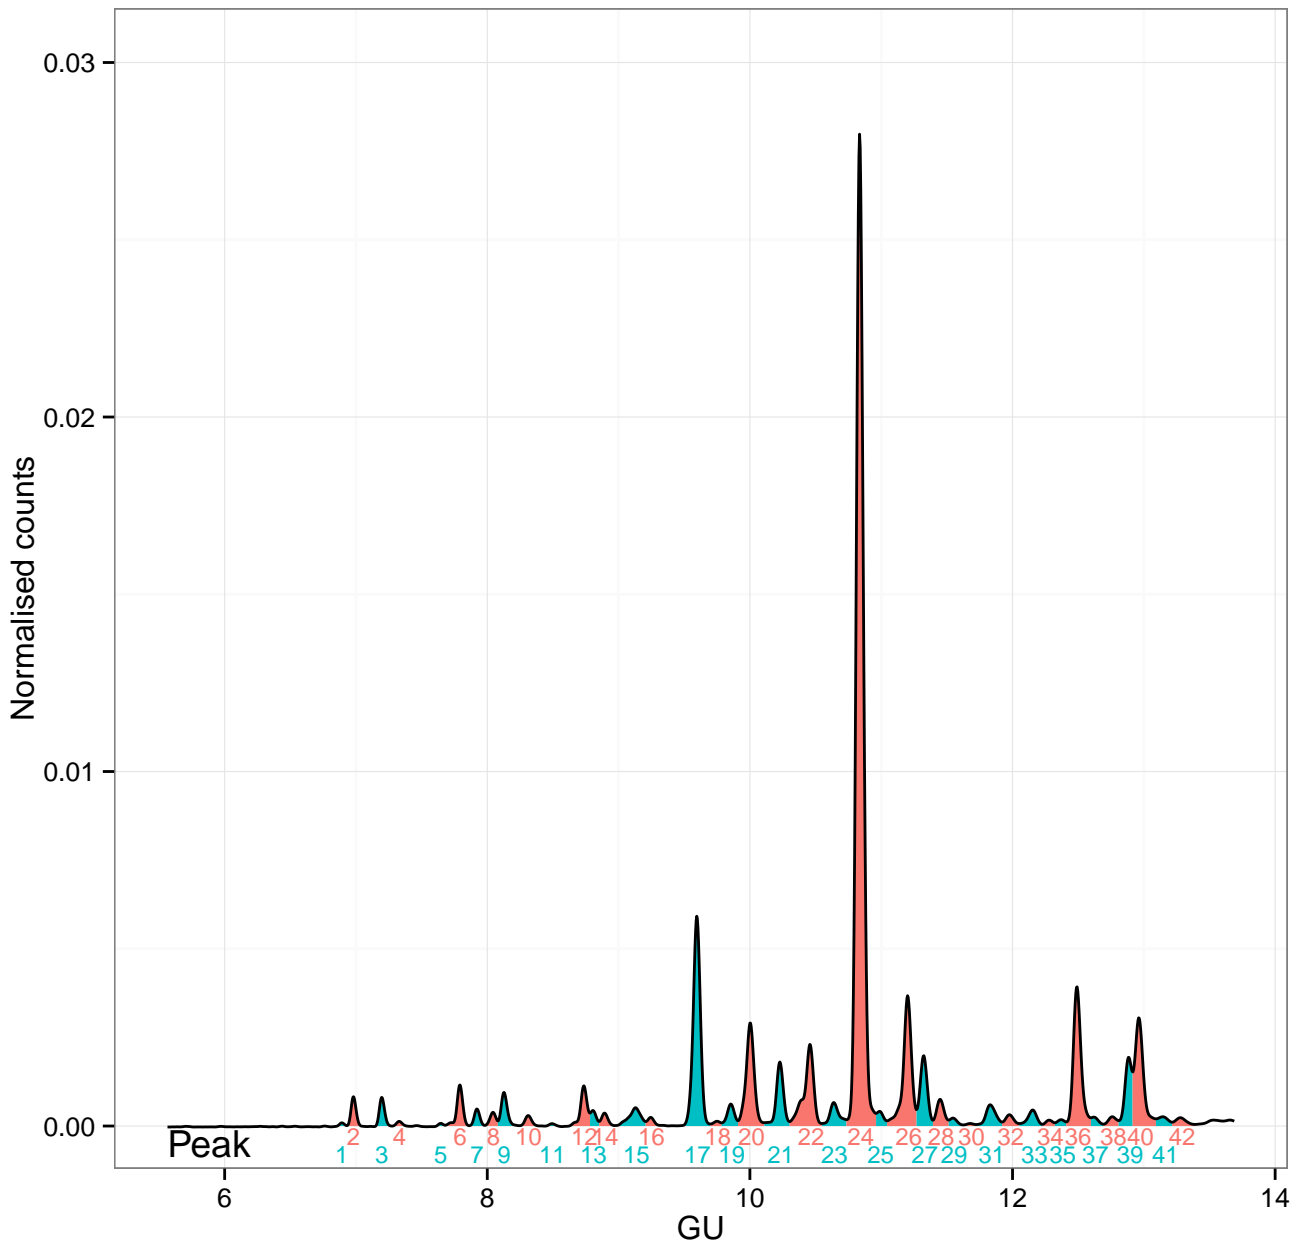

O-3

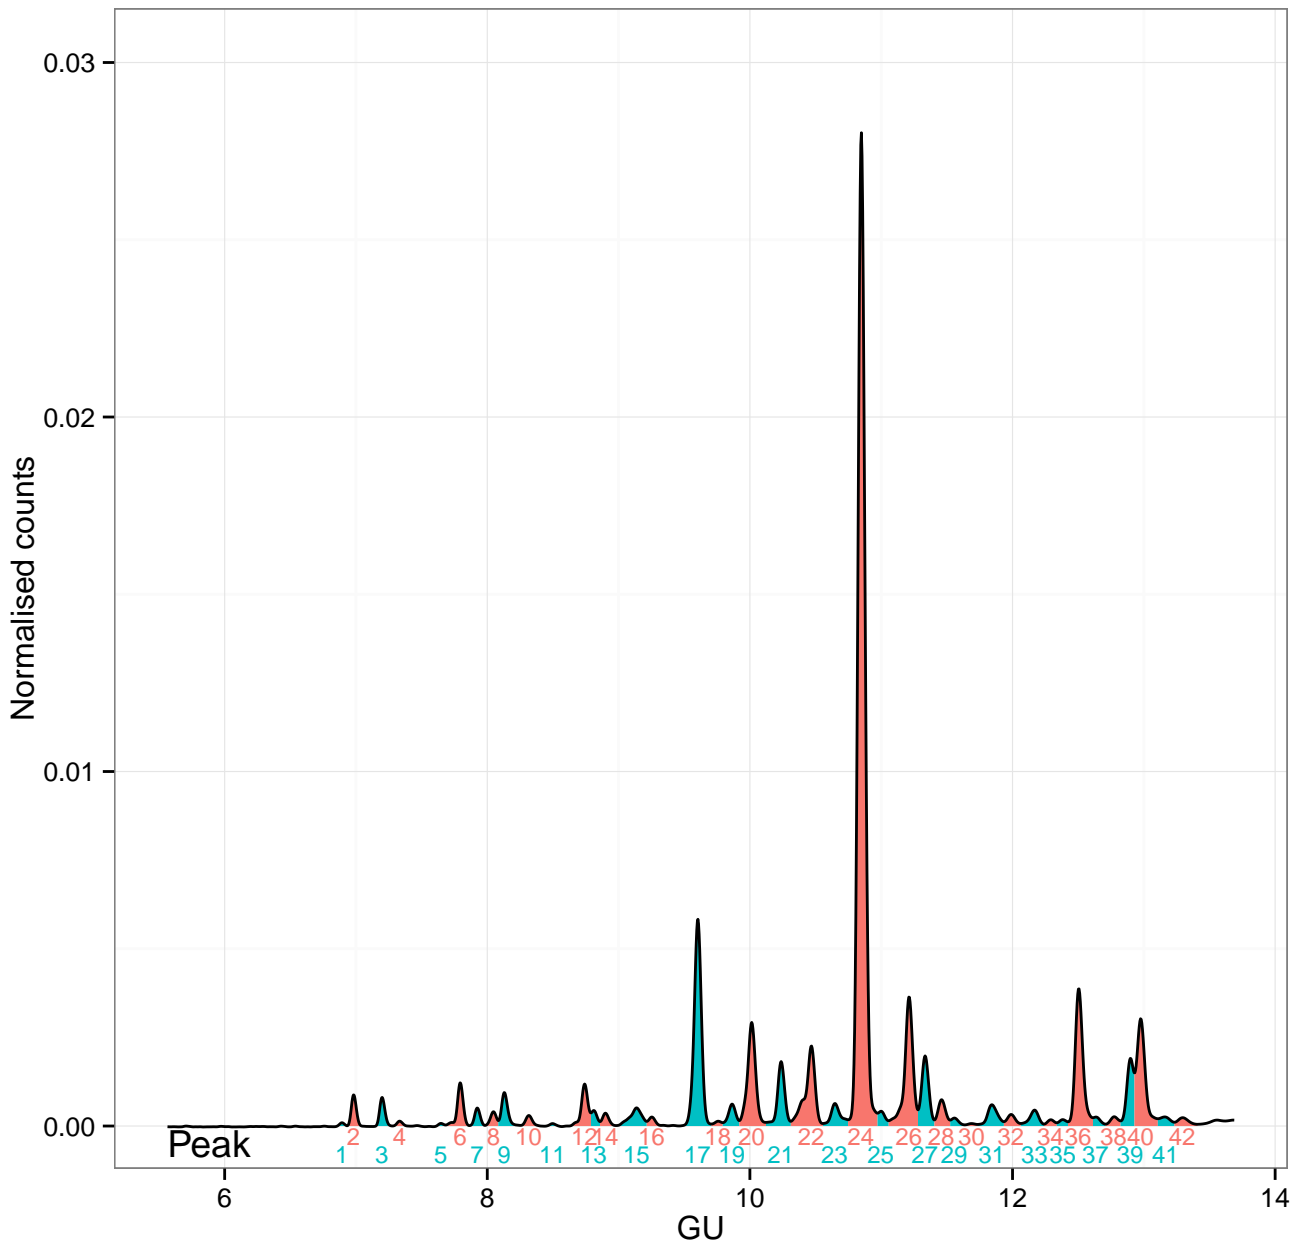



P-1

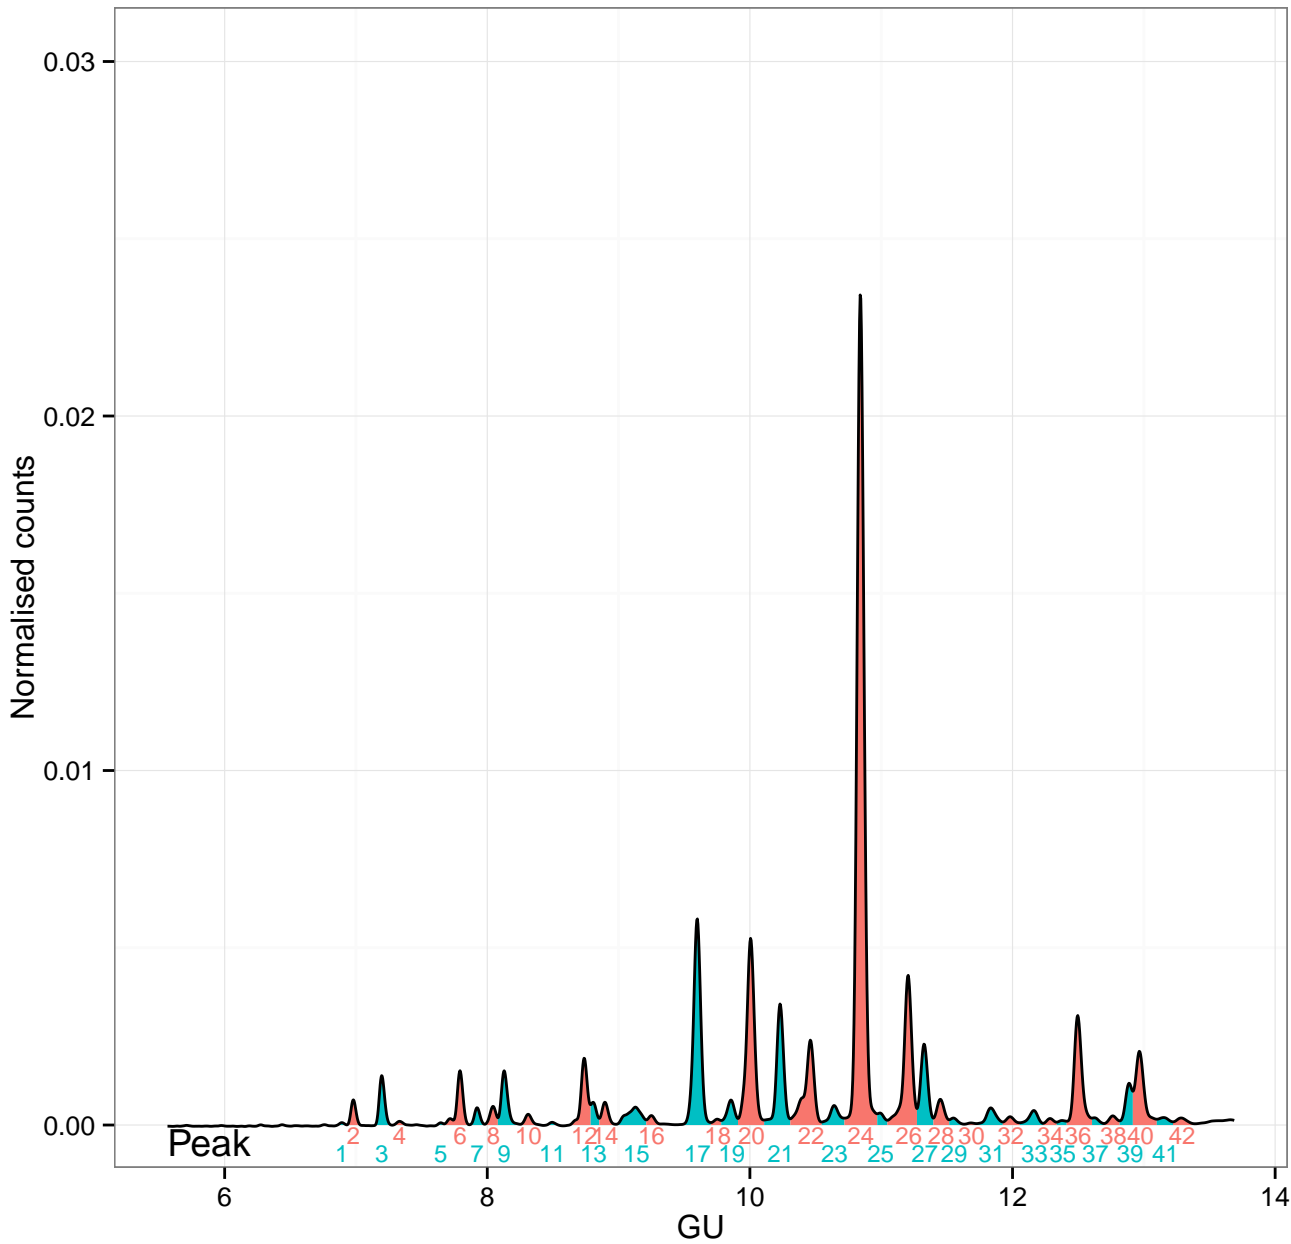

# P-3

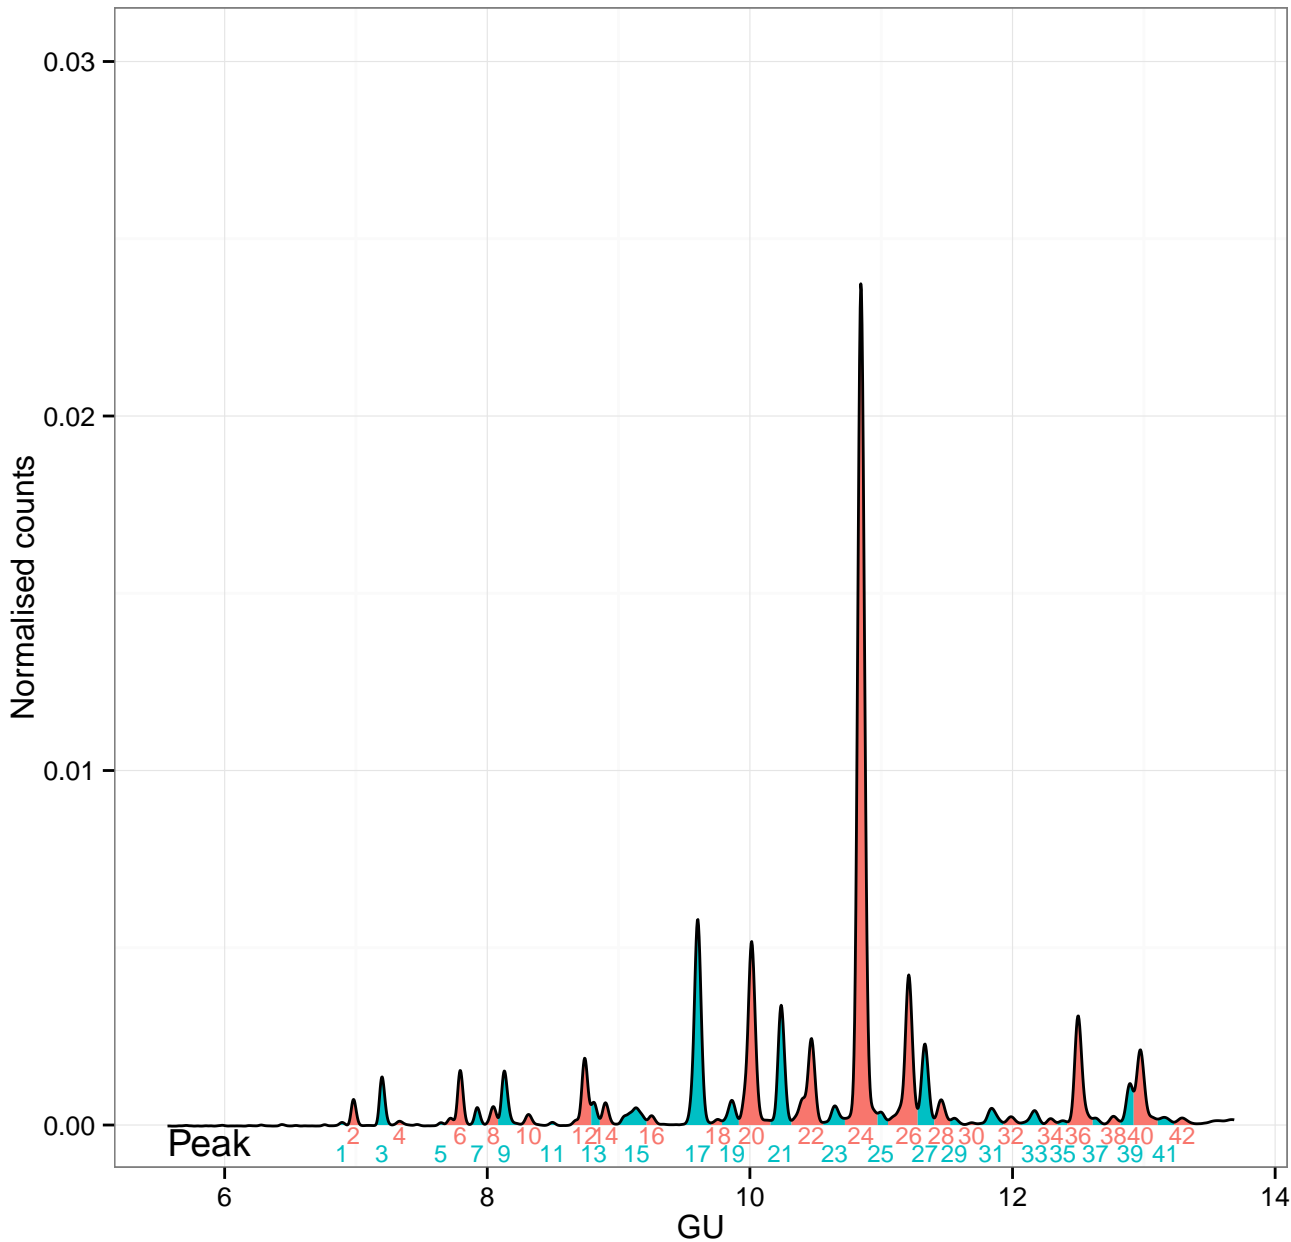

# Q-1

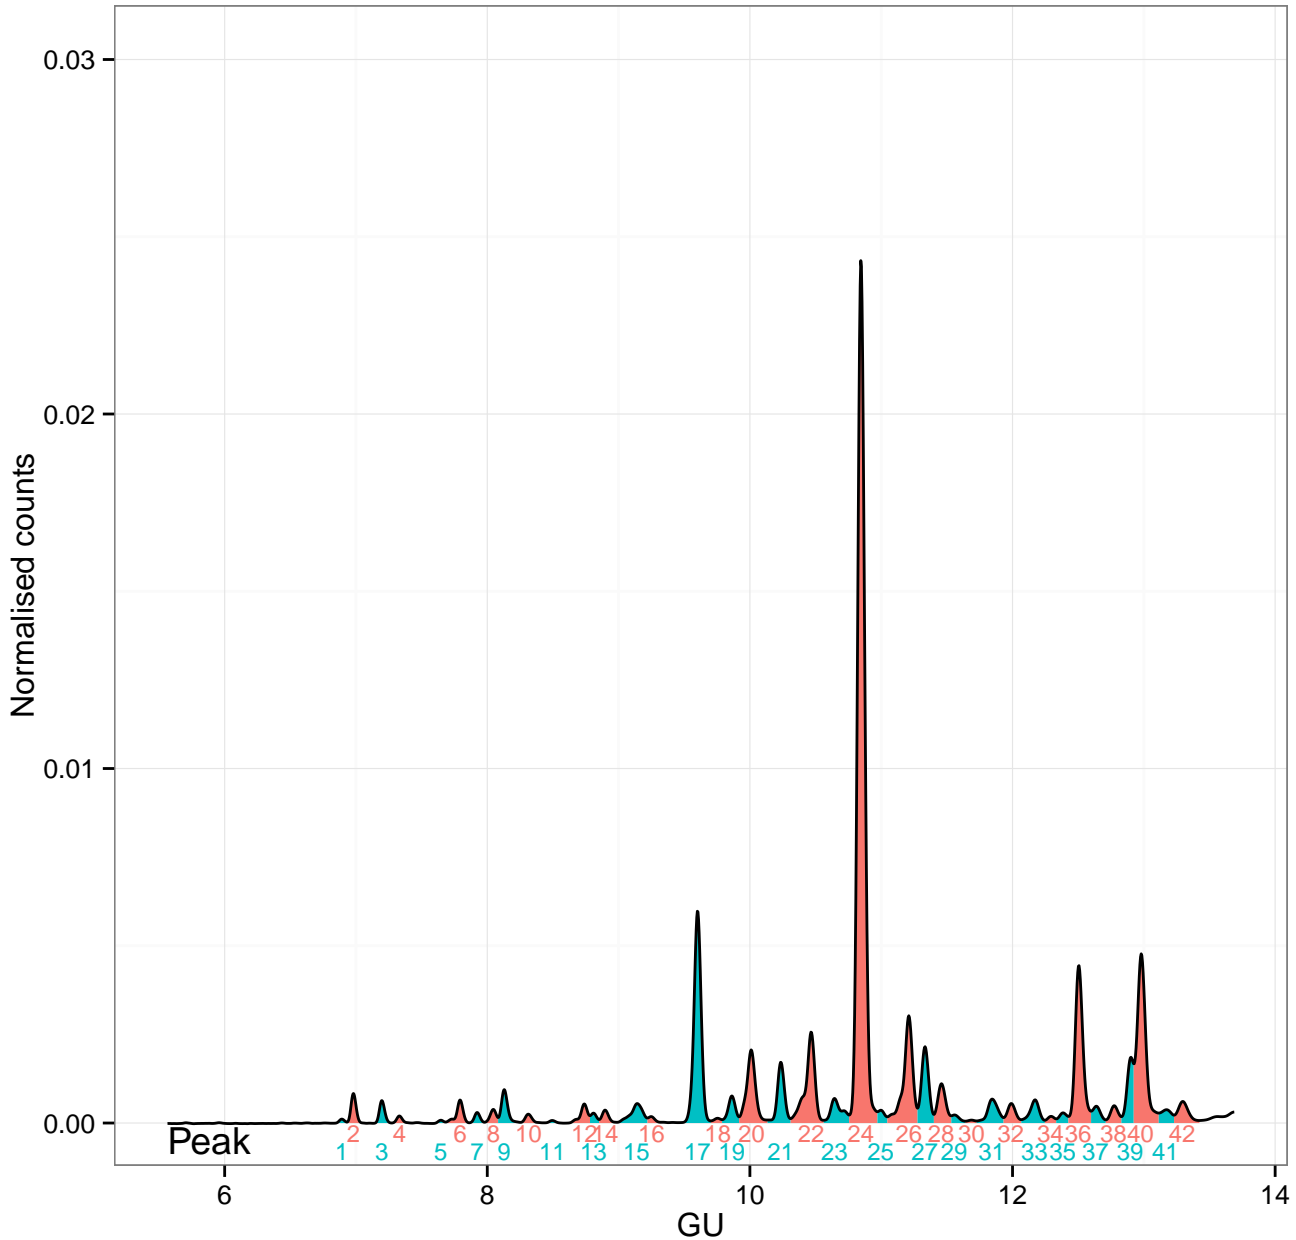

# Q-2

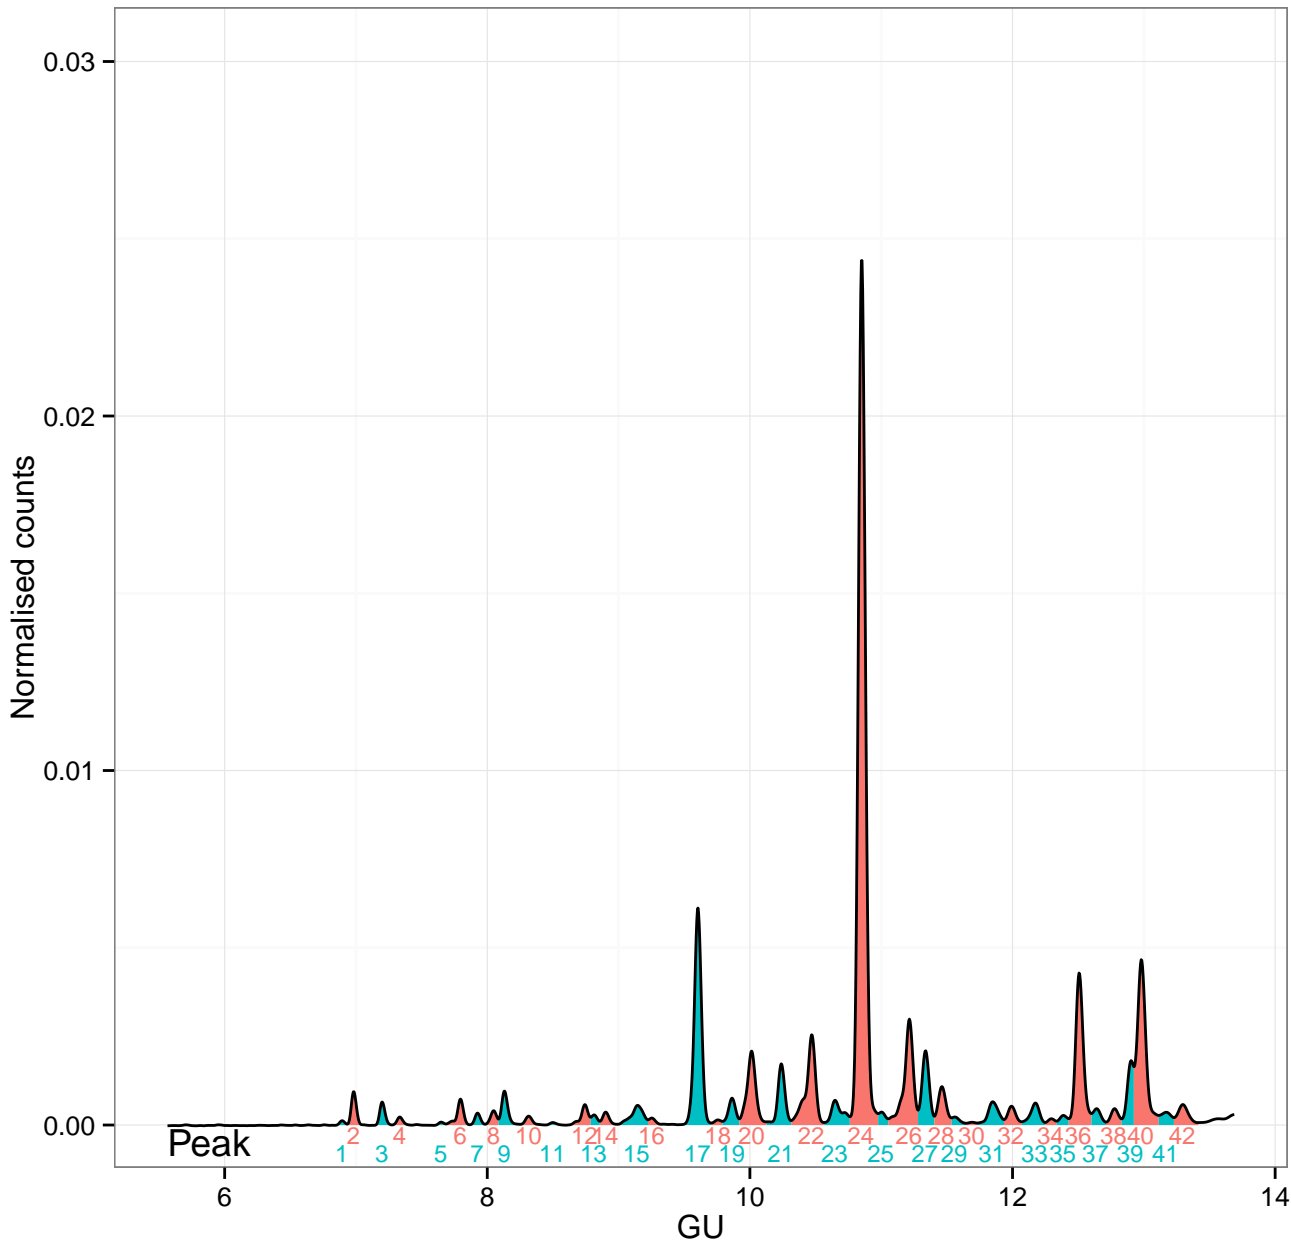

# Q-3

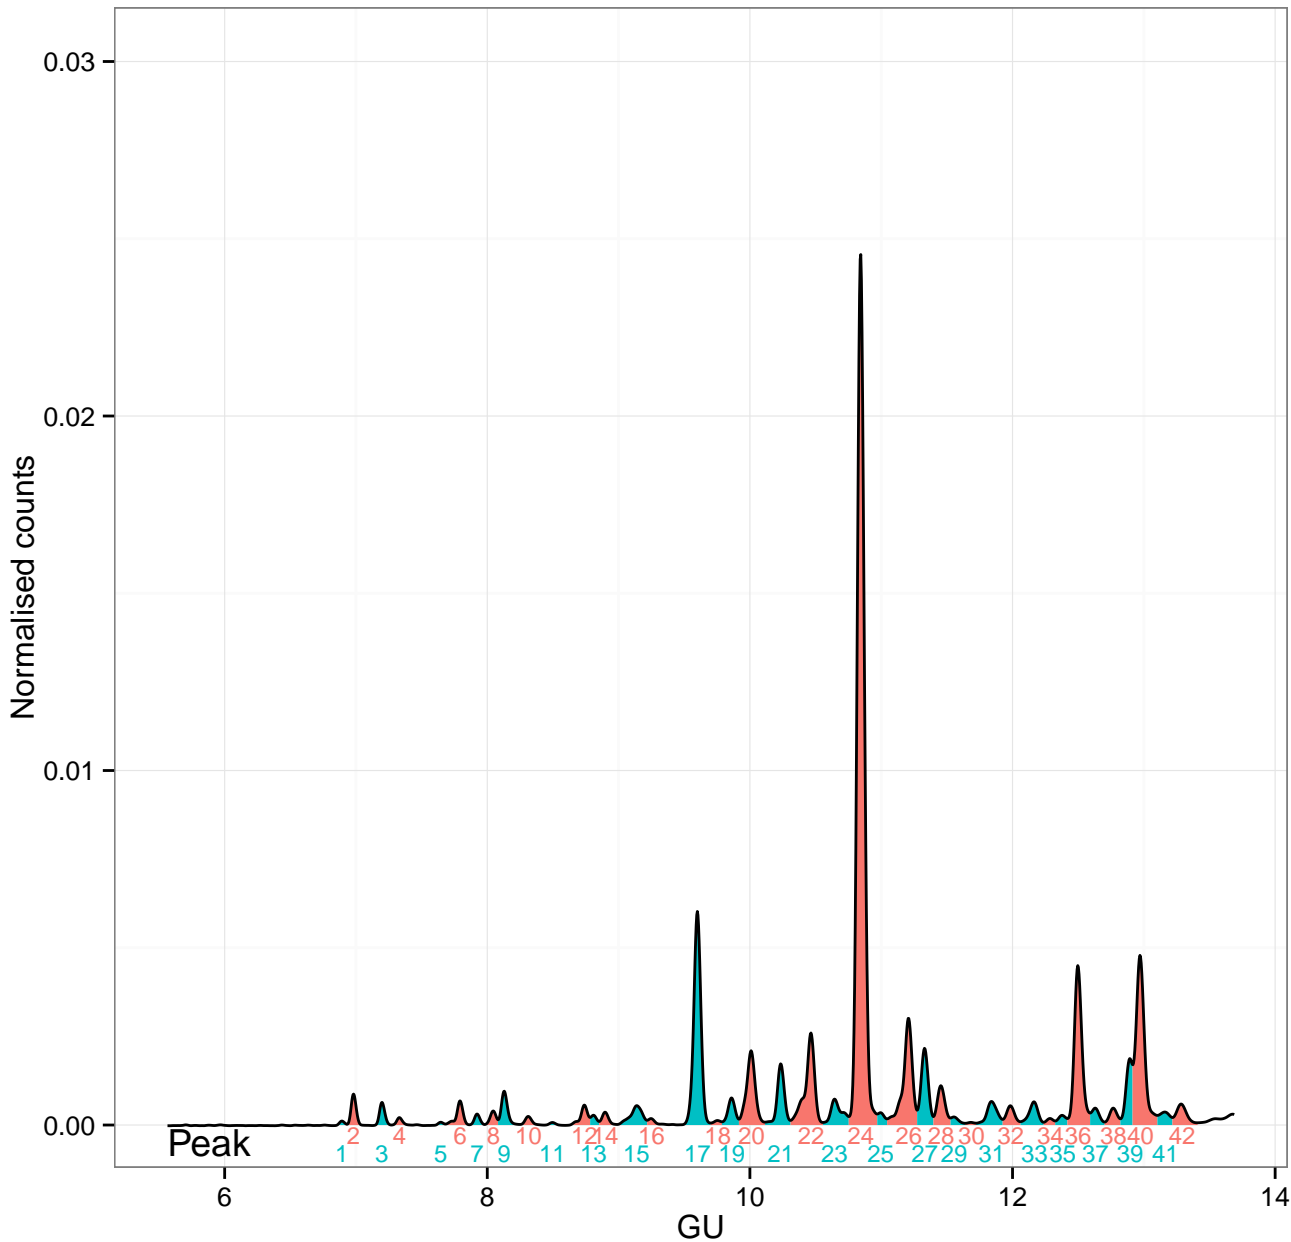

R-1

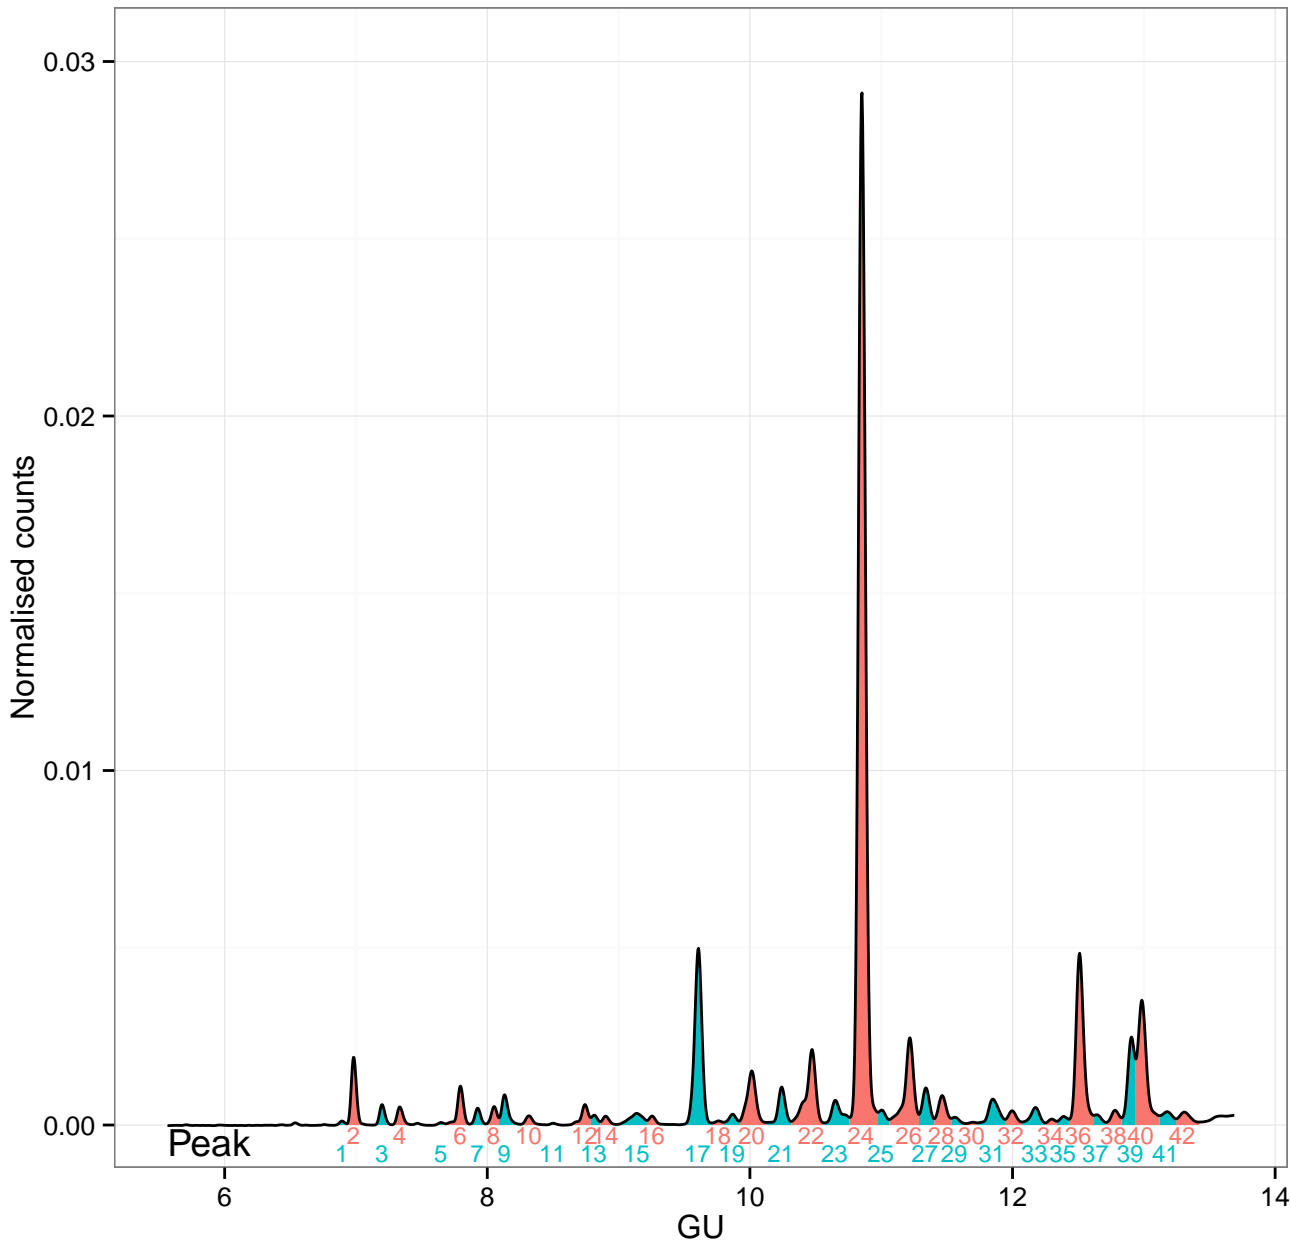

# R-2

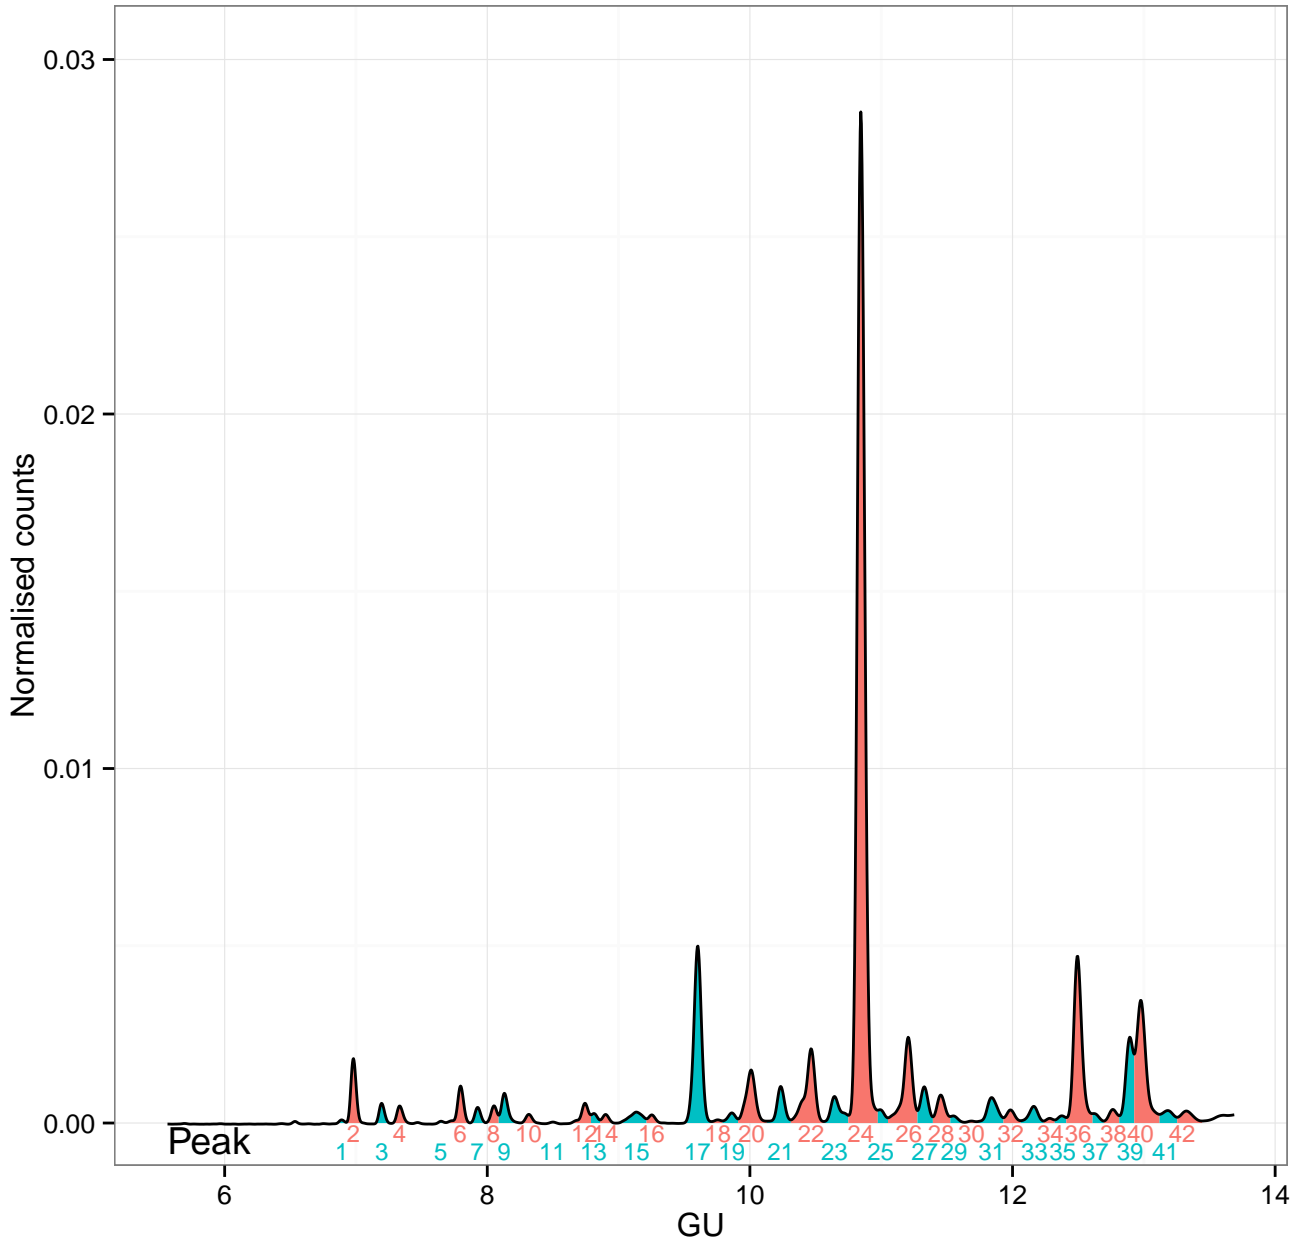

R-3

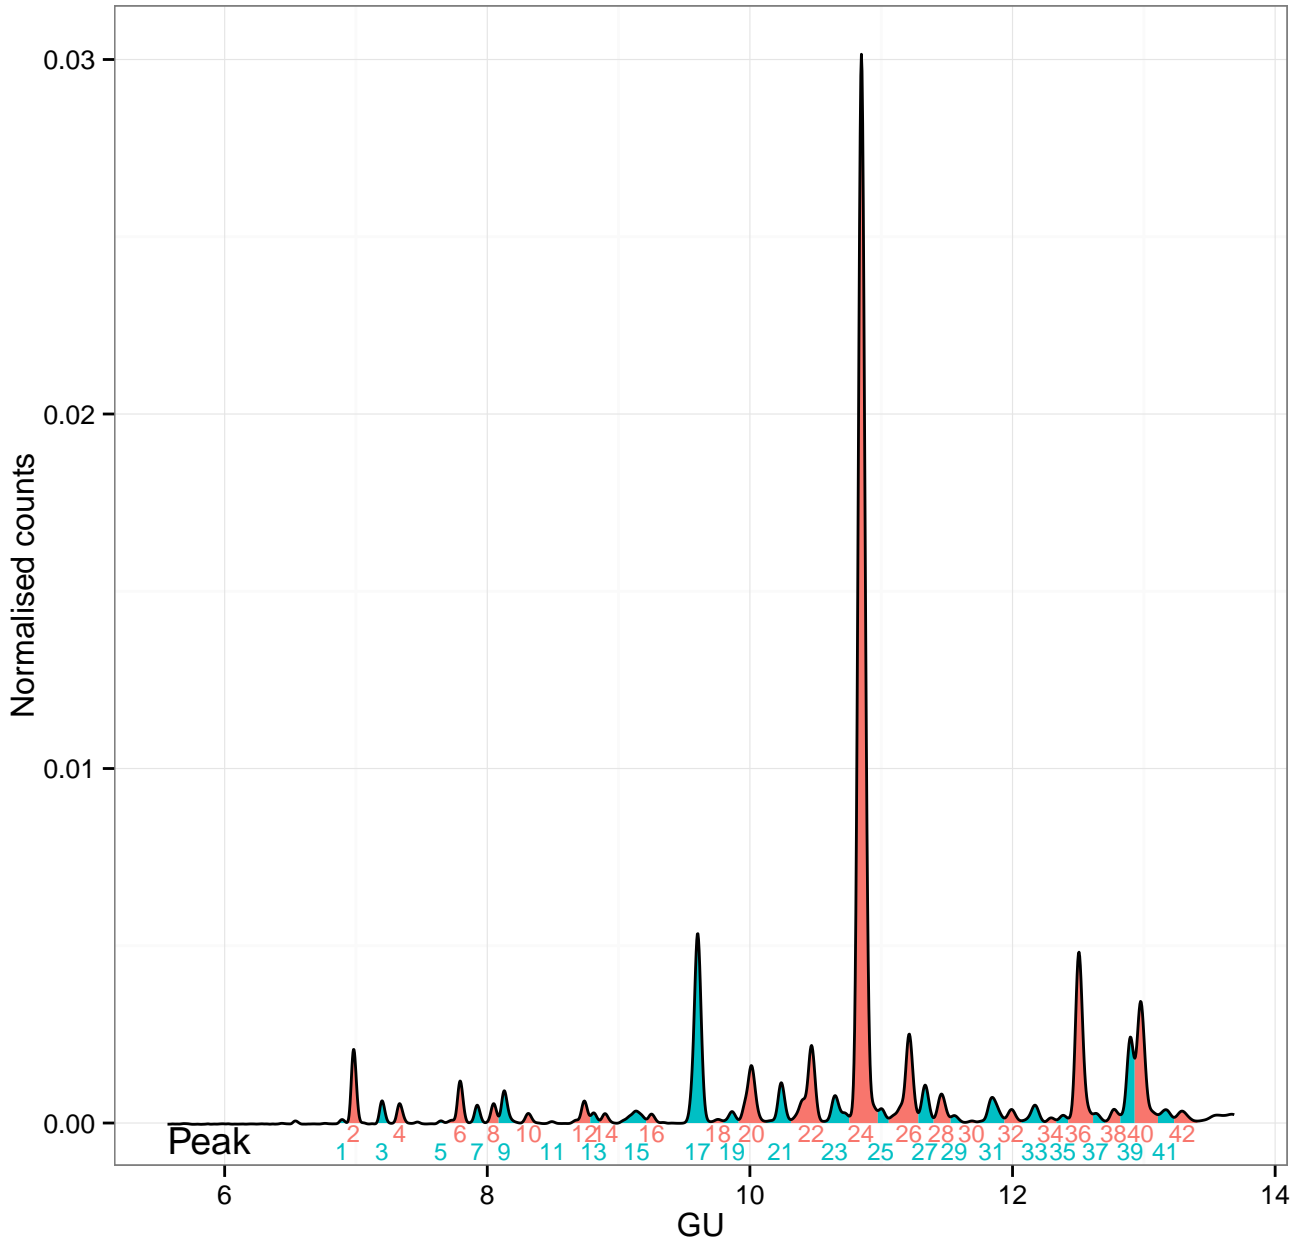



S-1

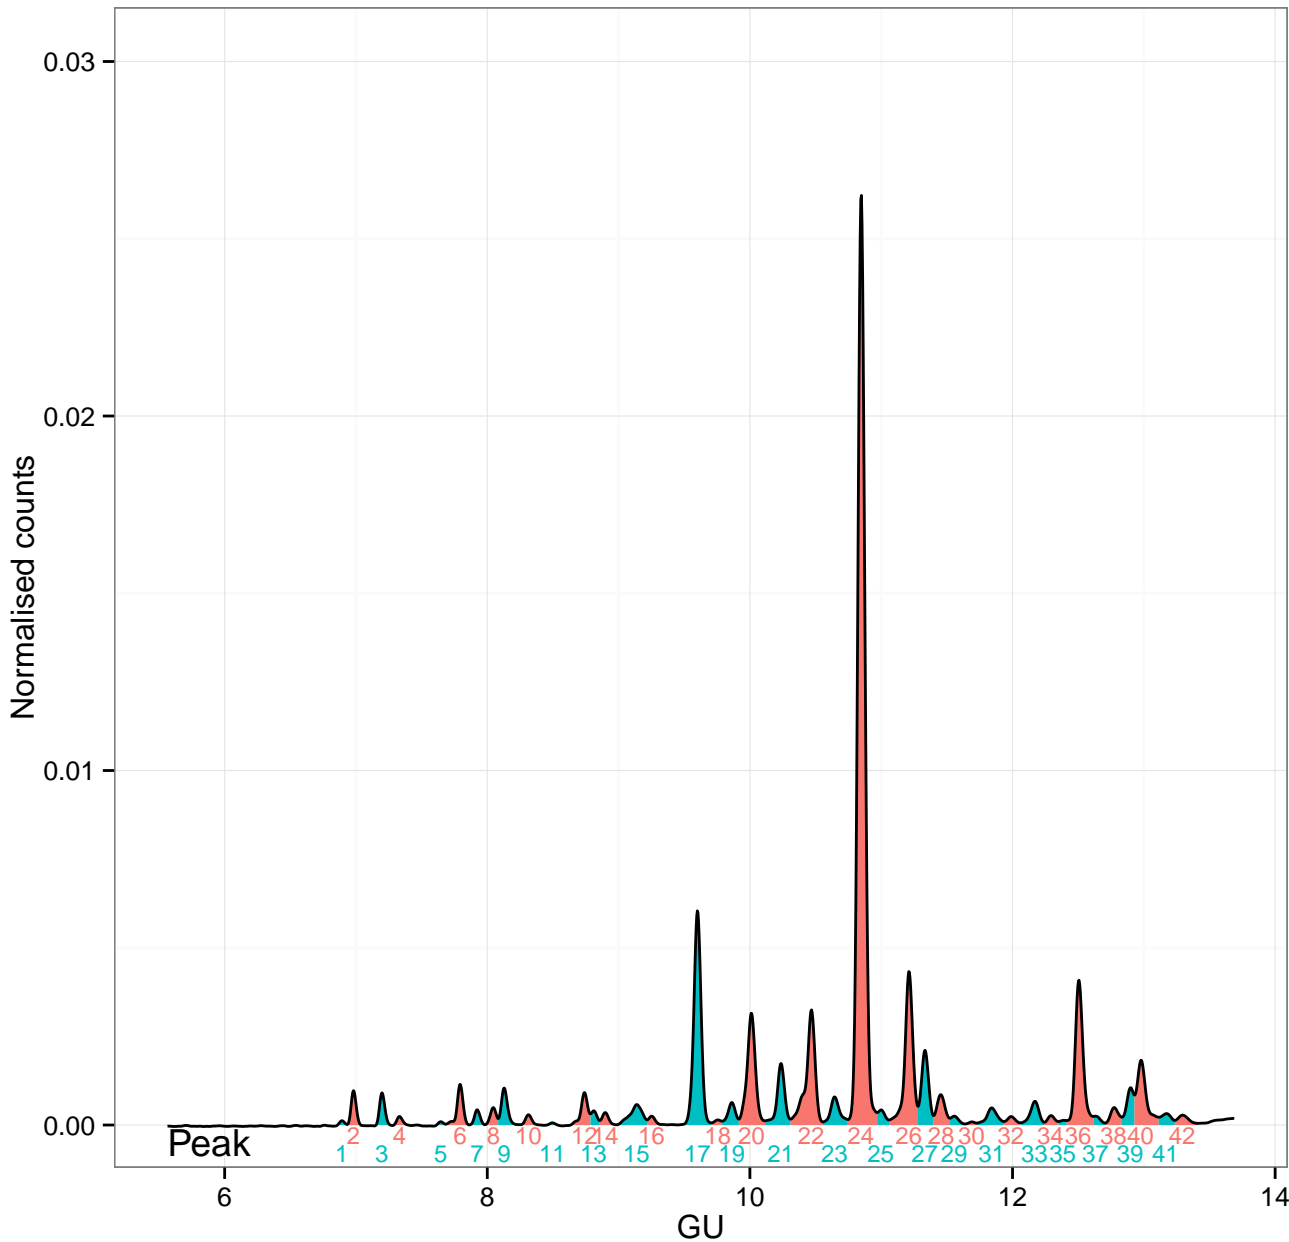

# S-3

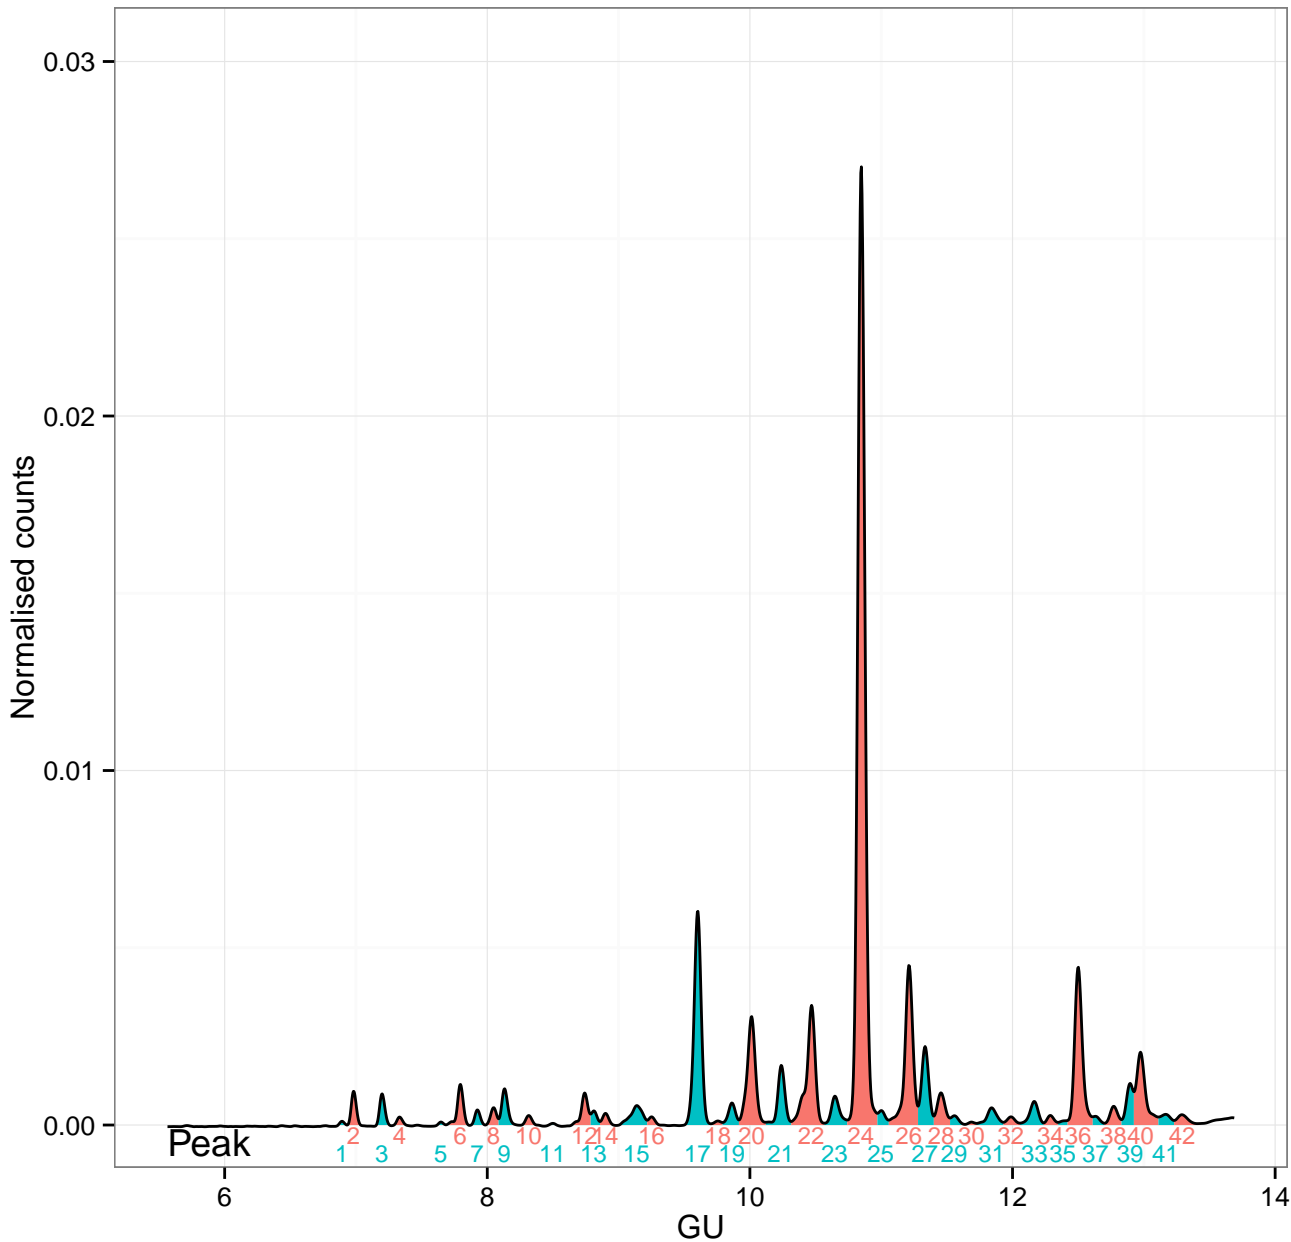

T-1

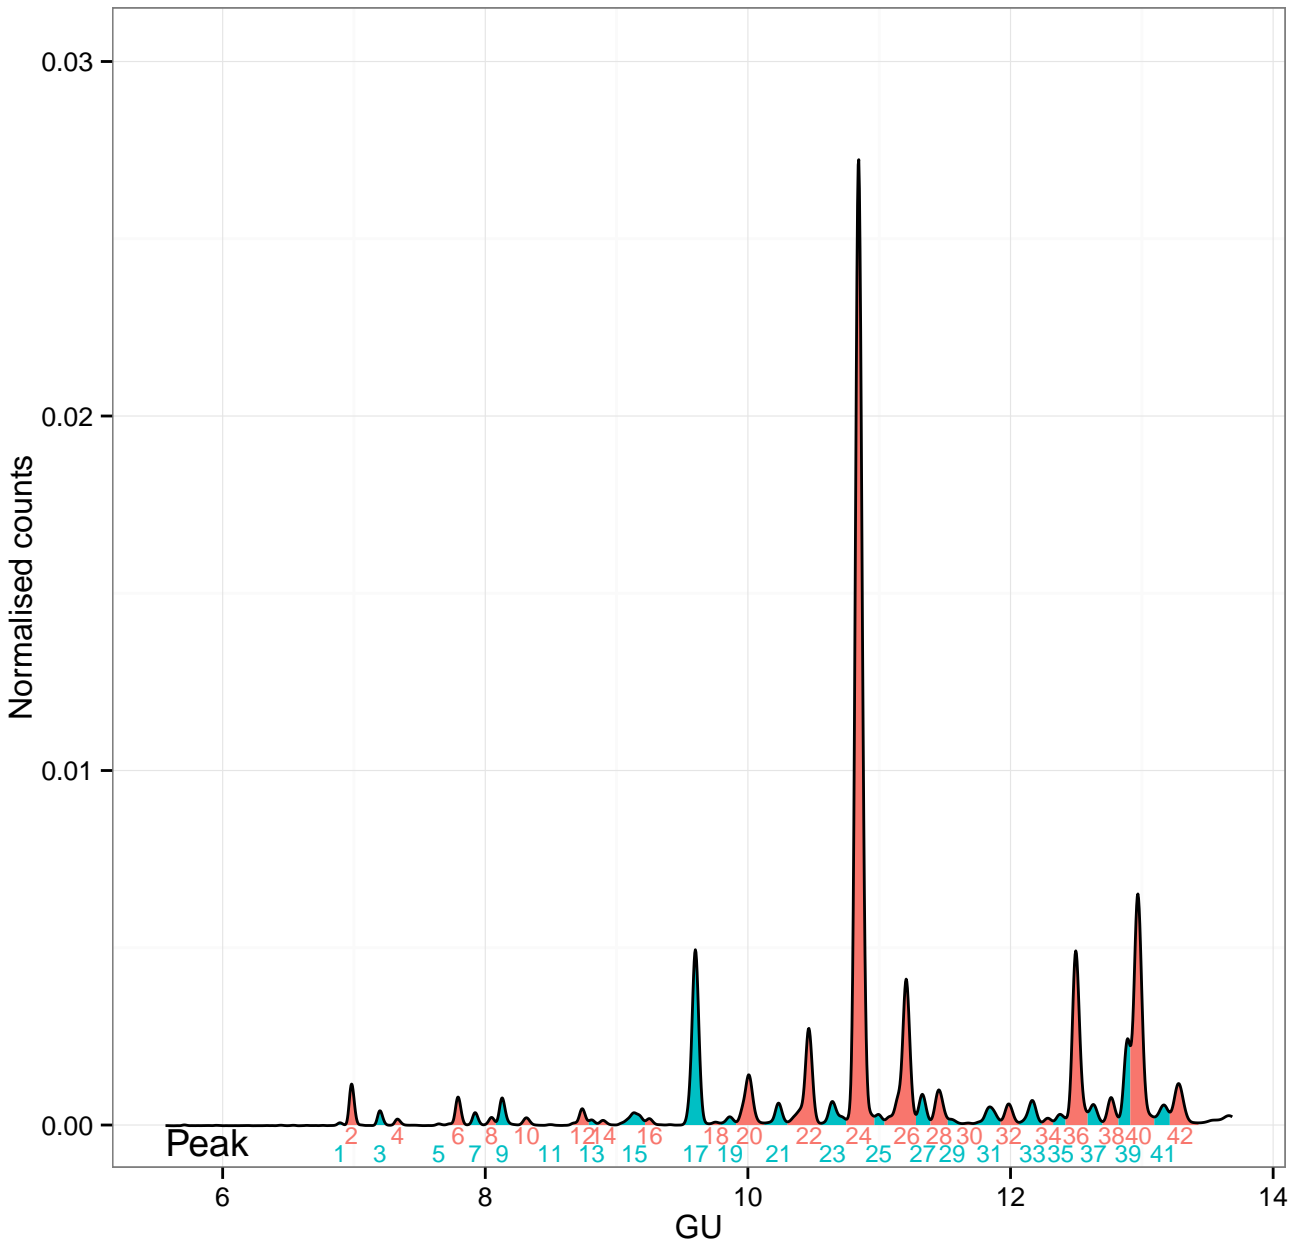

Peak

1 2 3 4 5 6 7 8 9 10 11 12 13 14 15 16 17 18 19 20 21 22 23 24 25 26 27 28 29 30 31 32 33 34 35 36 37 38 39 40 41 42

GU

T-2

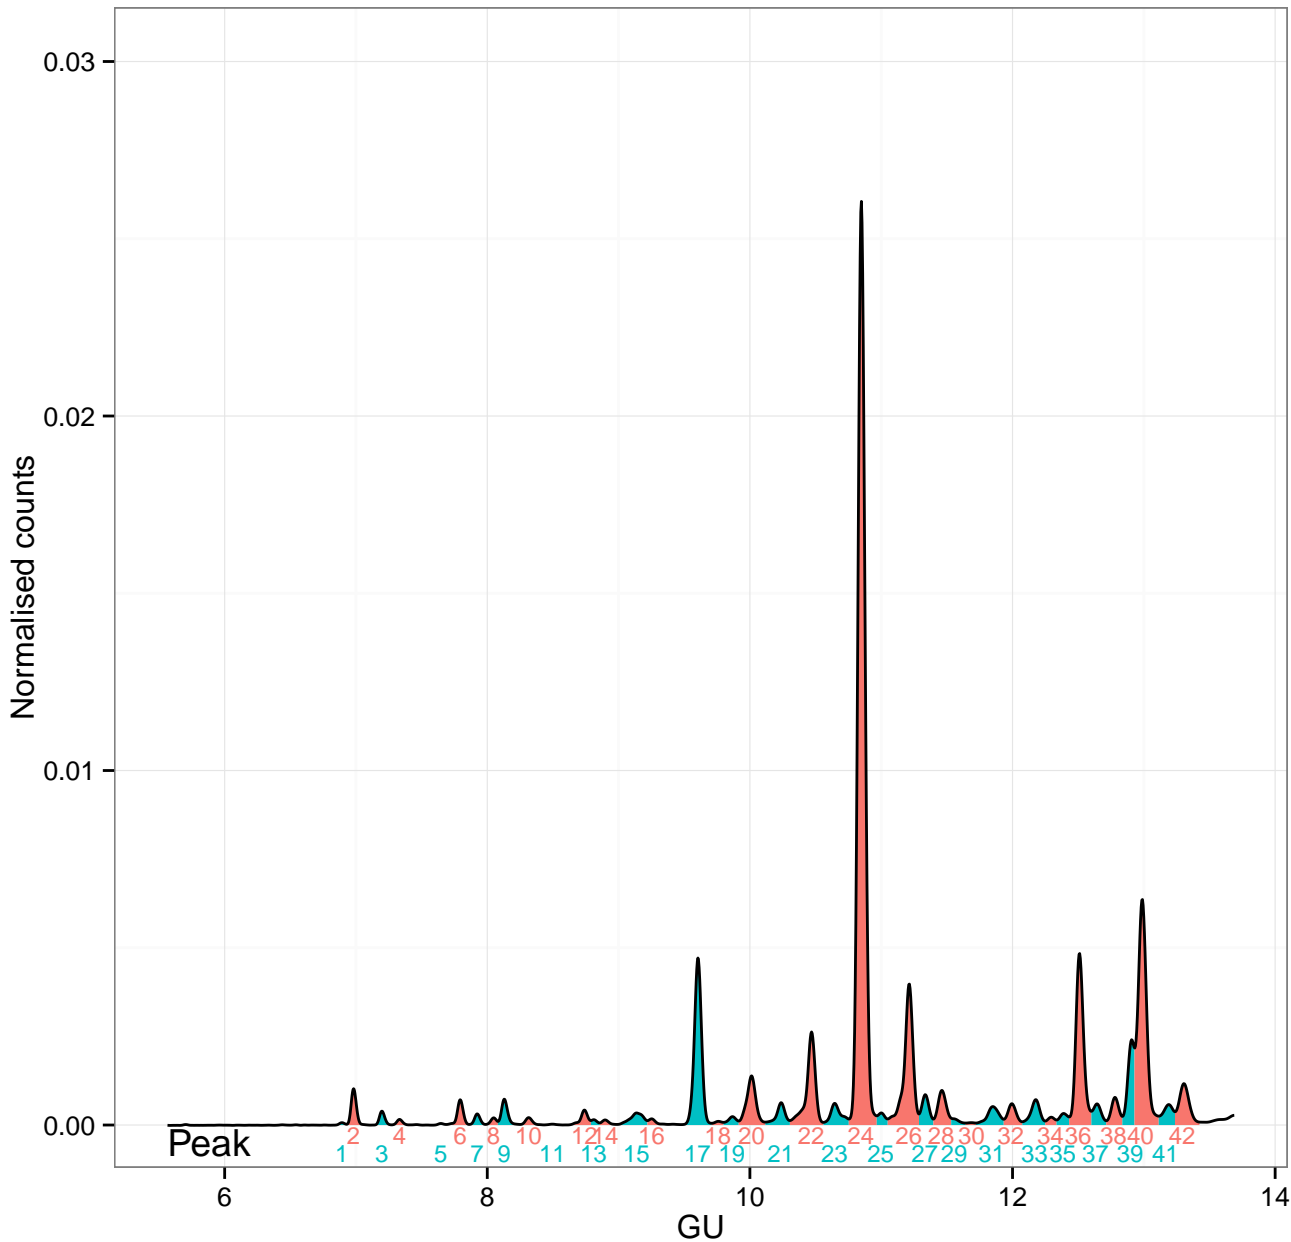

T-3

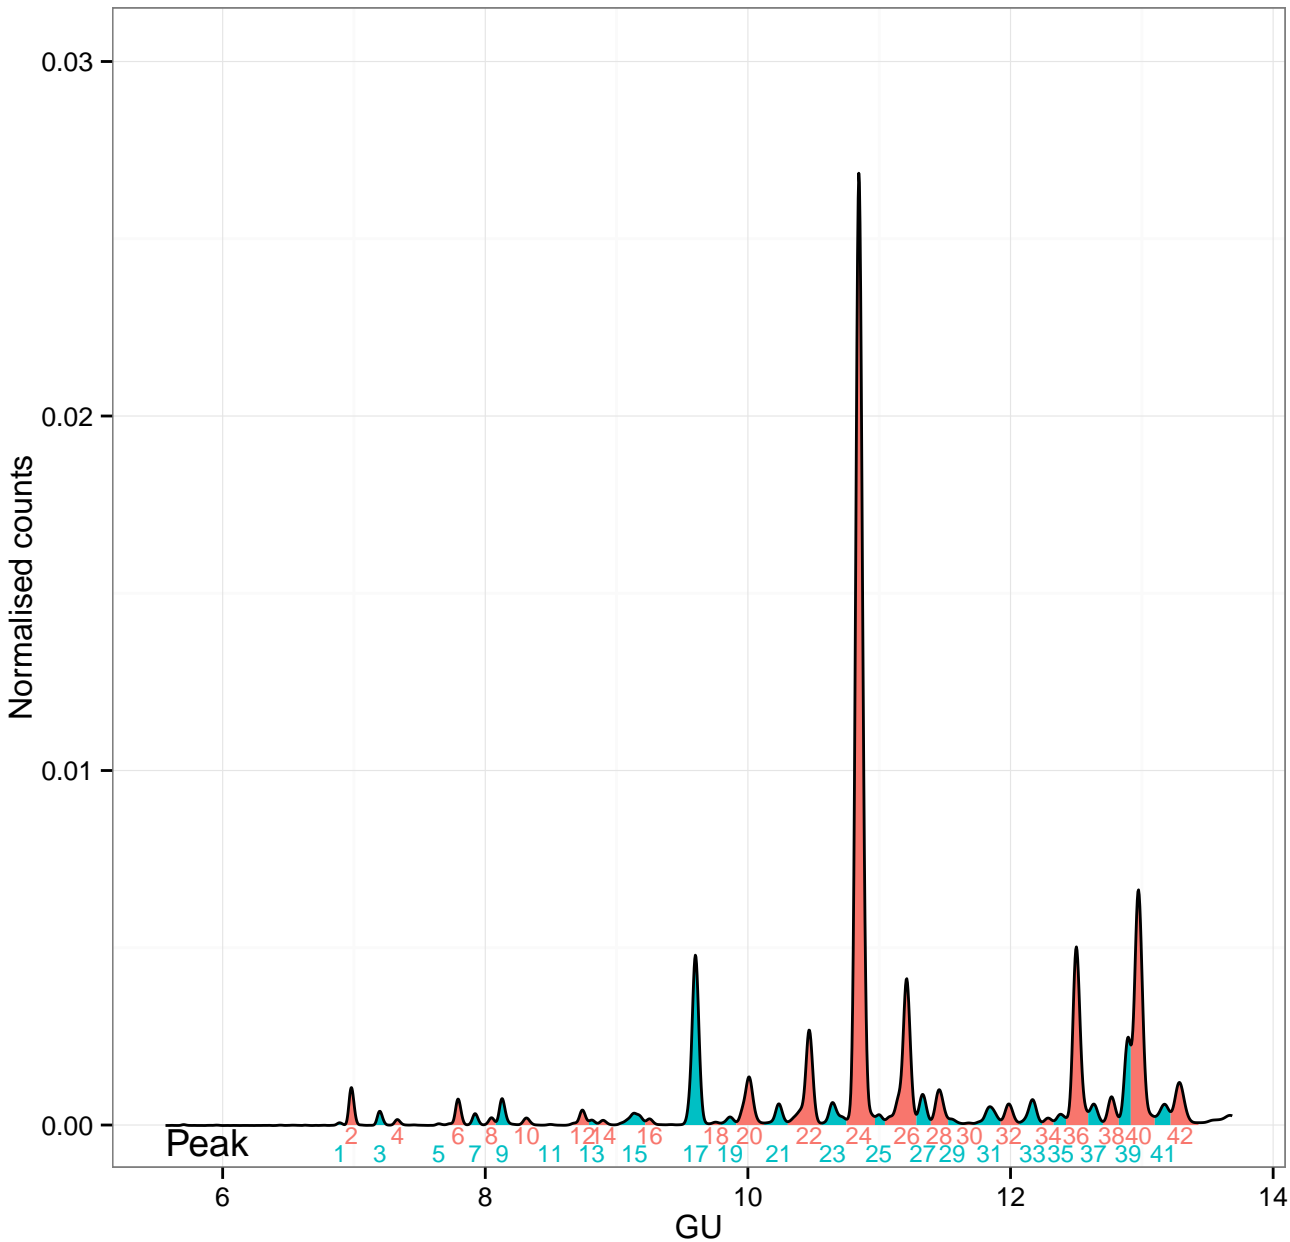

# U-2

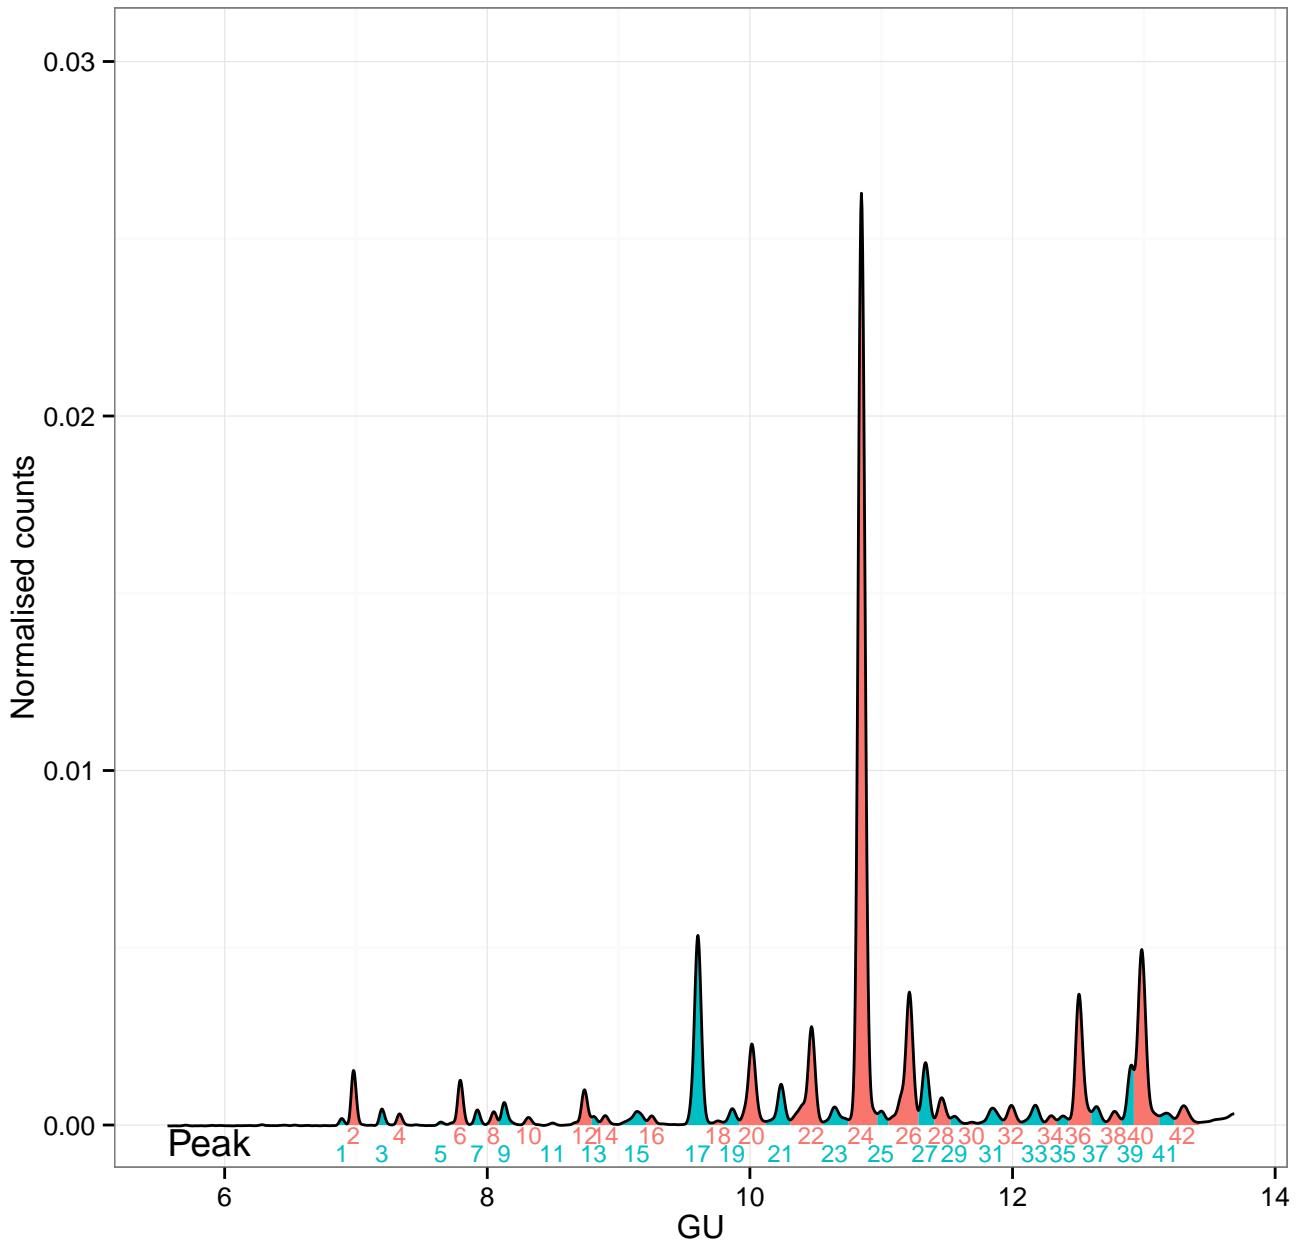

# U-3

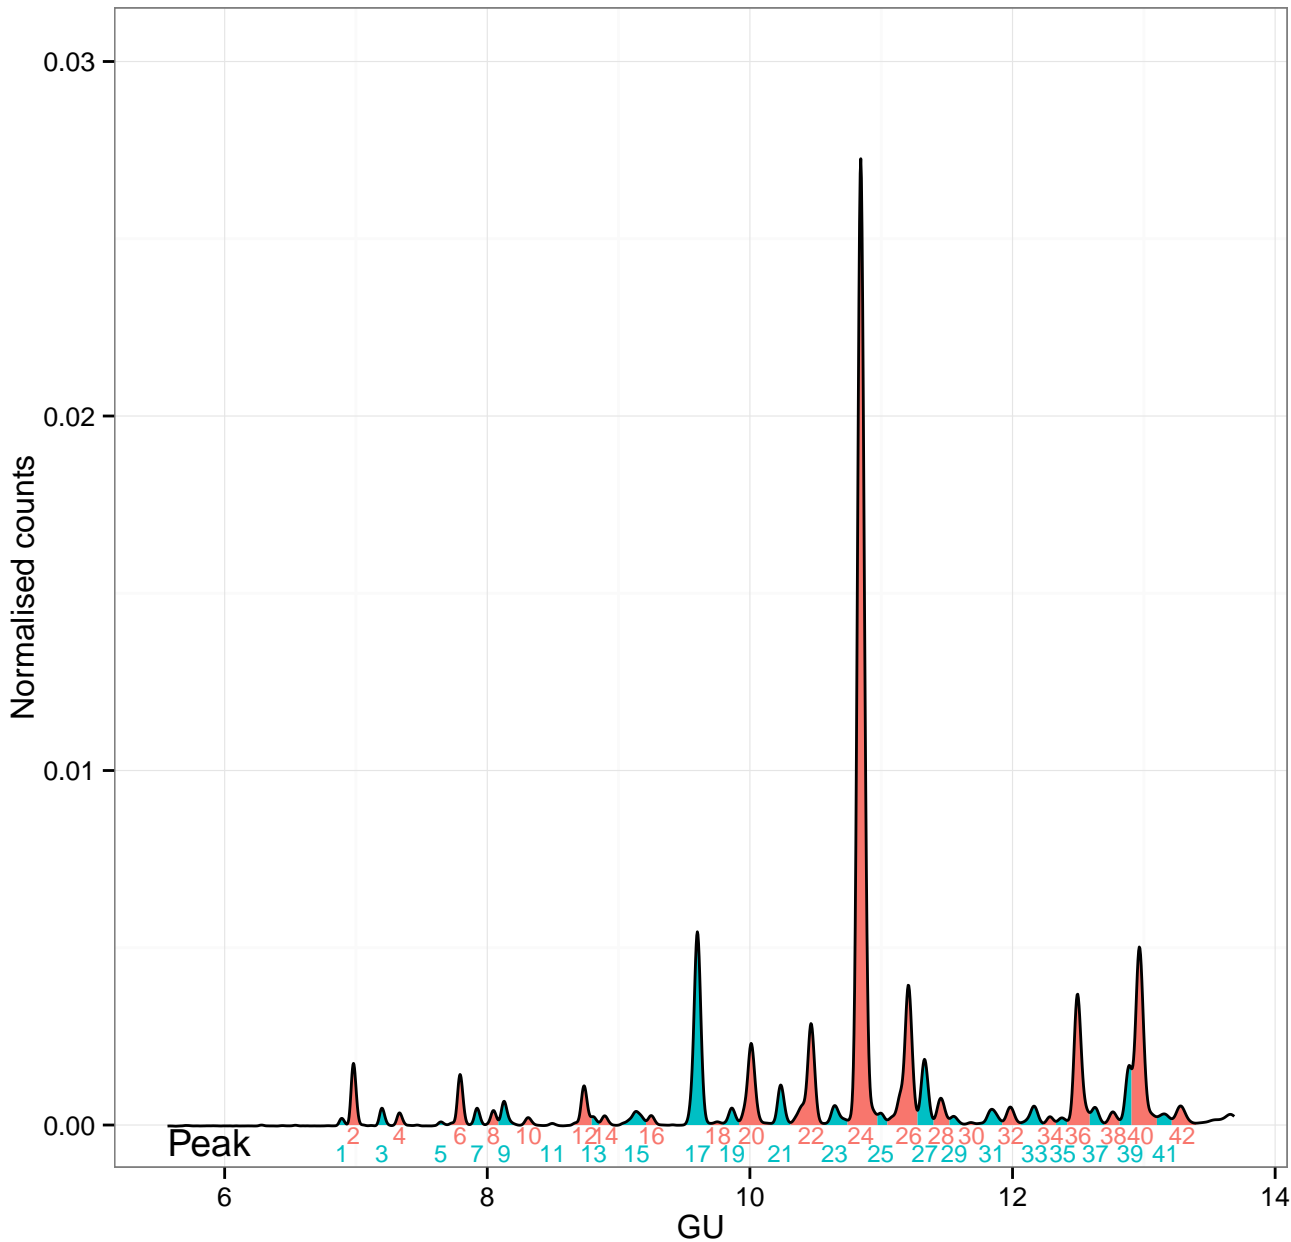

V-1

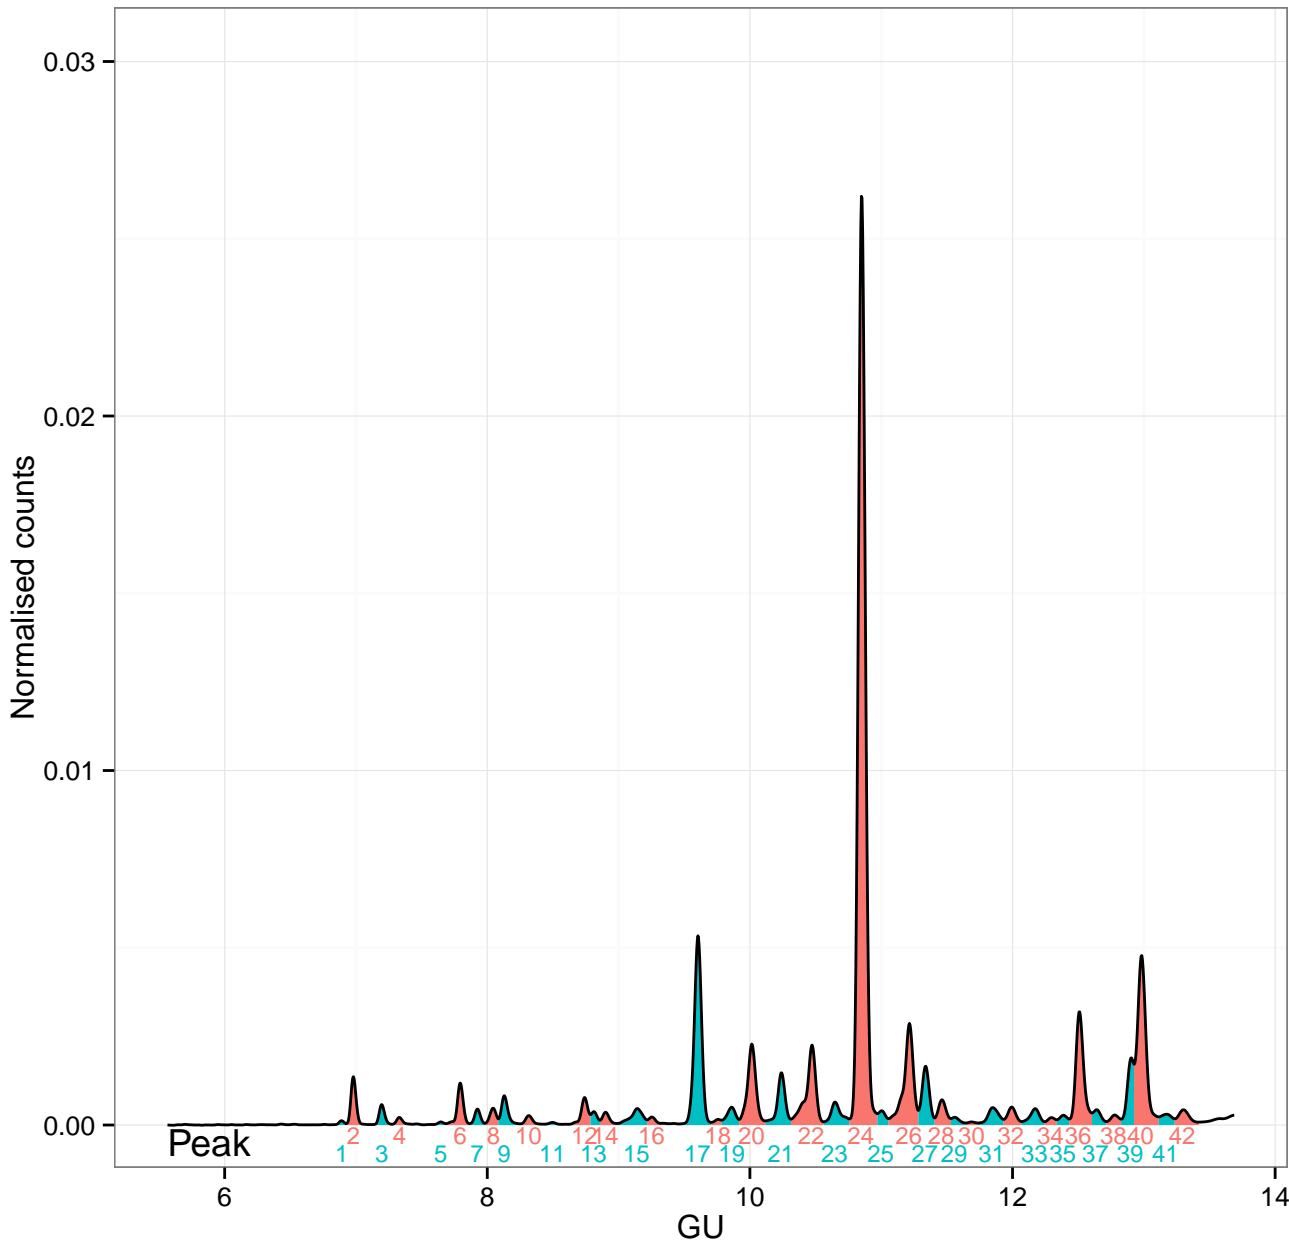



V-2

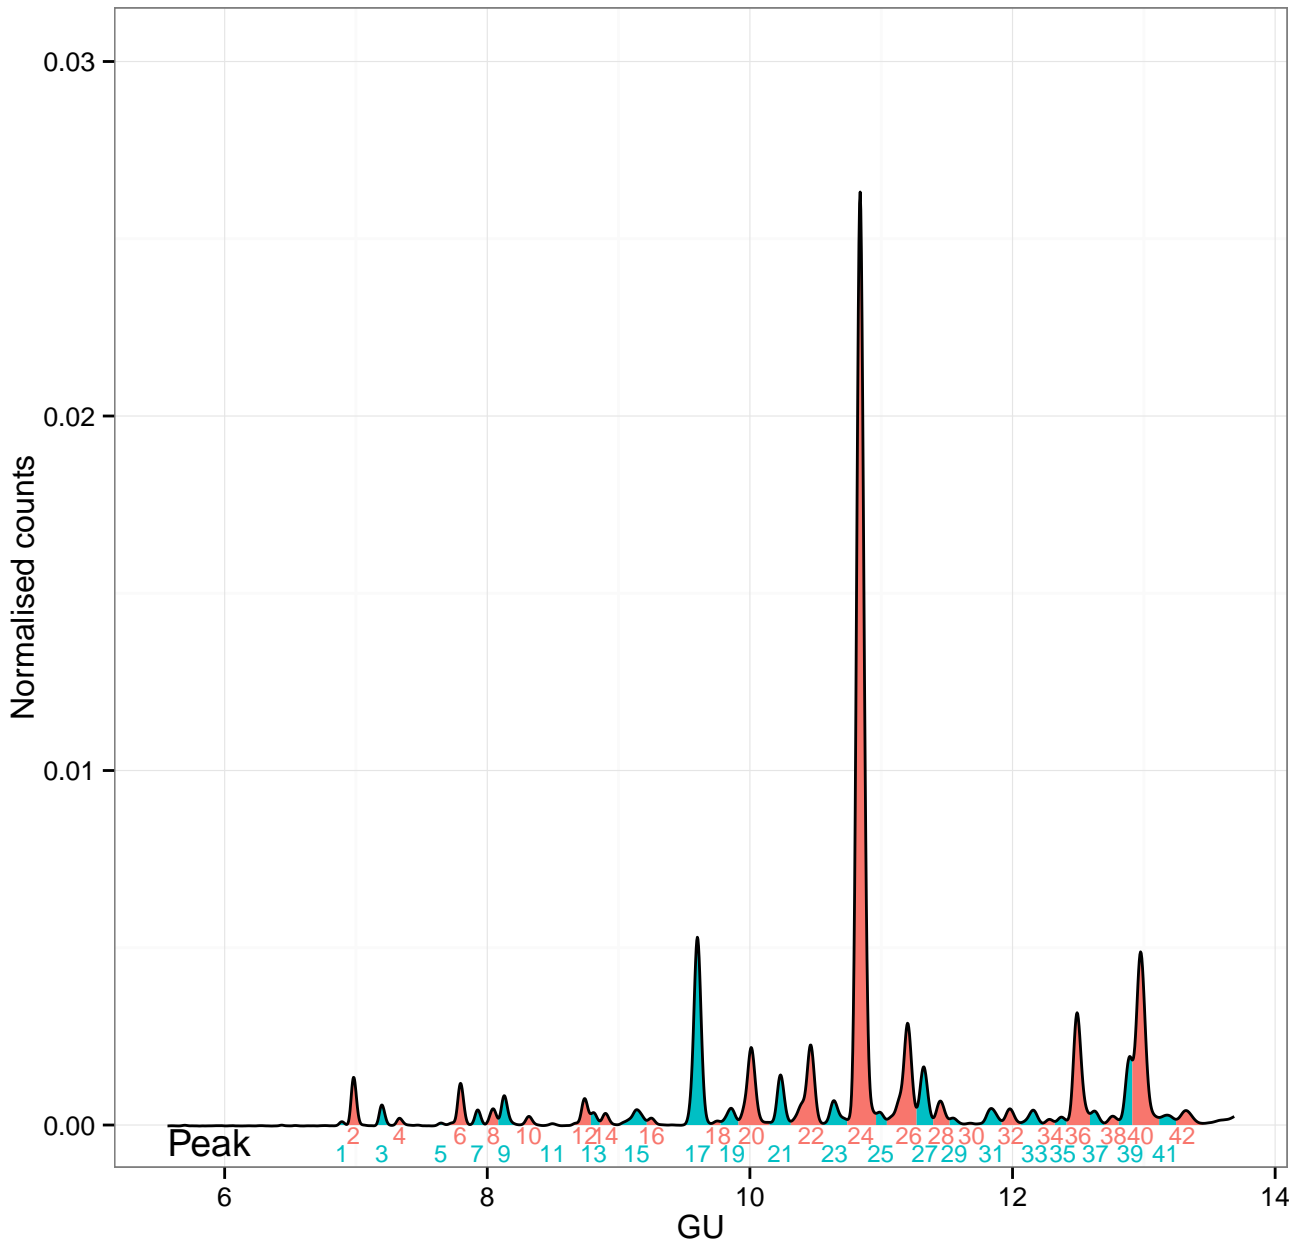

V-3

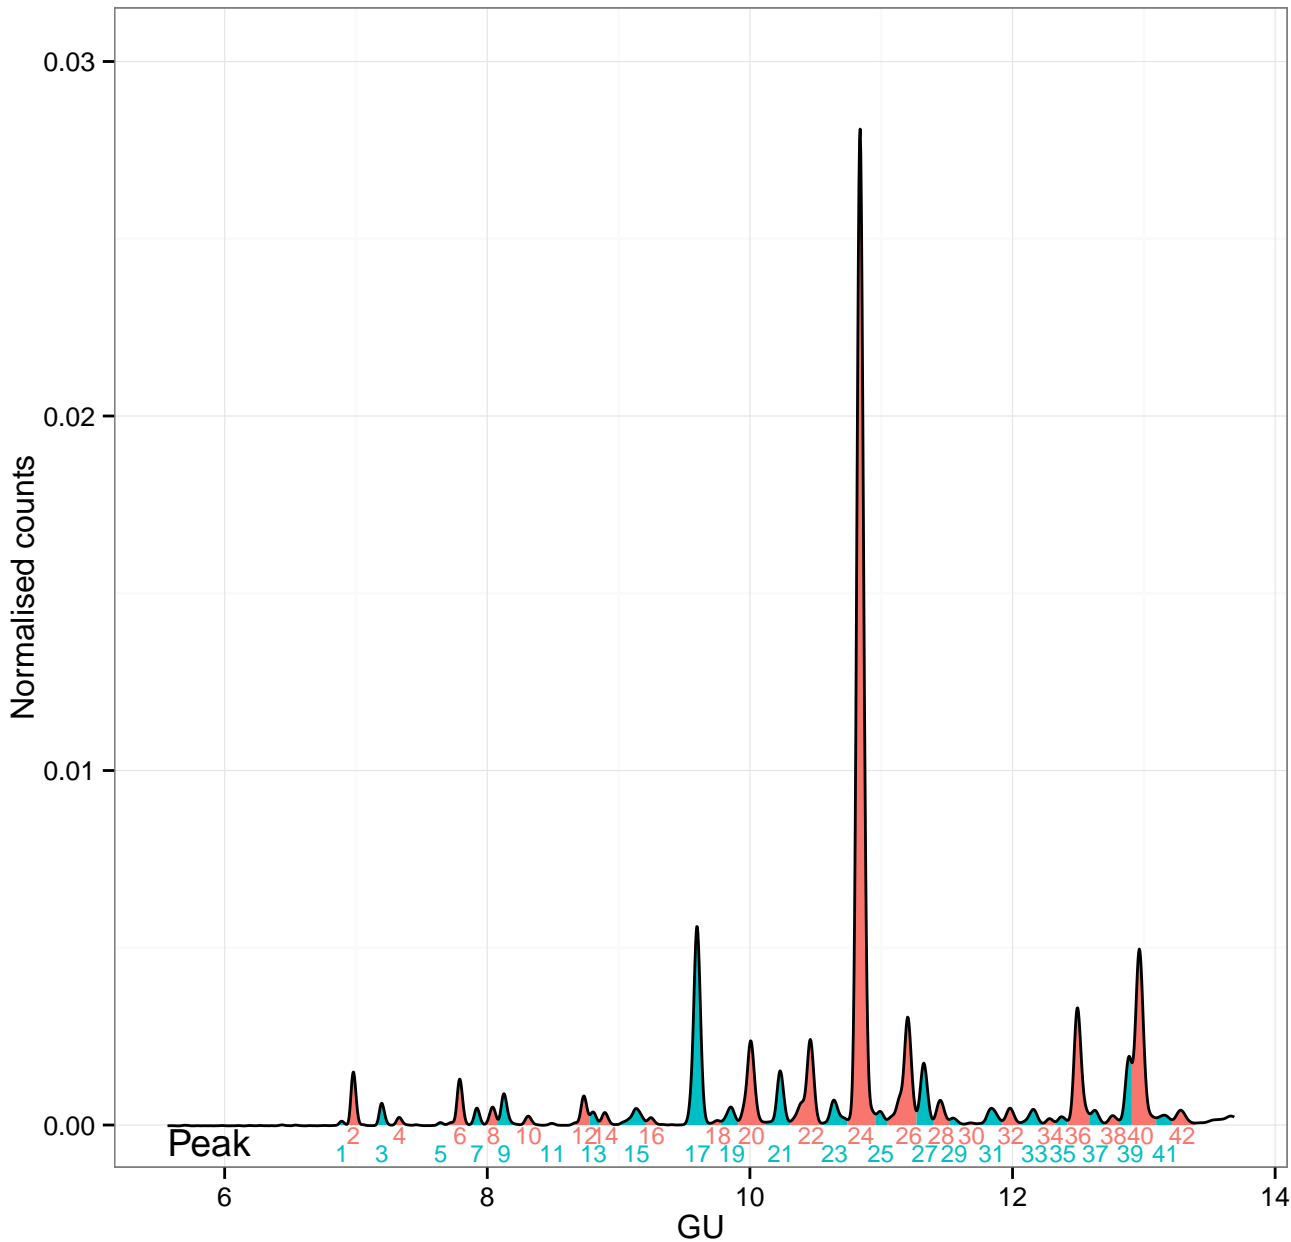

W-1

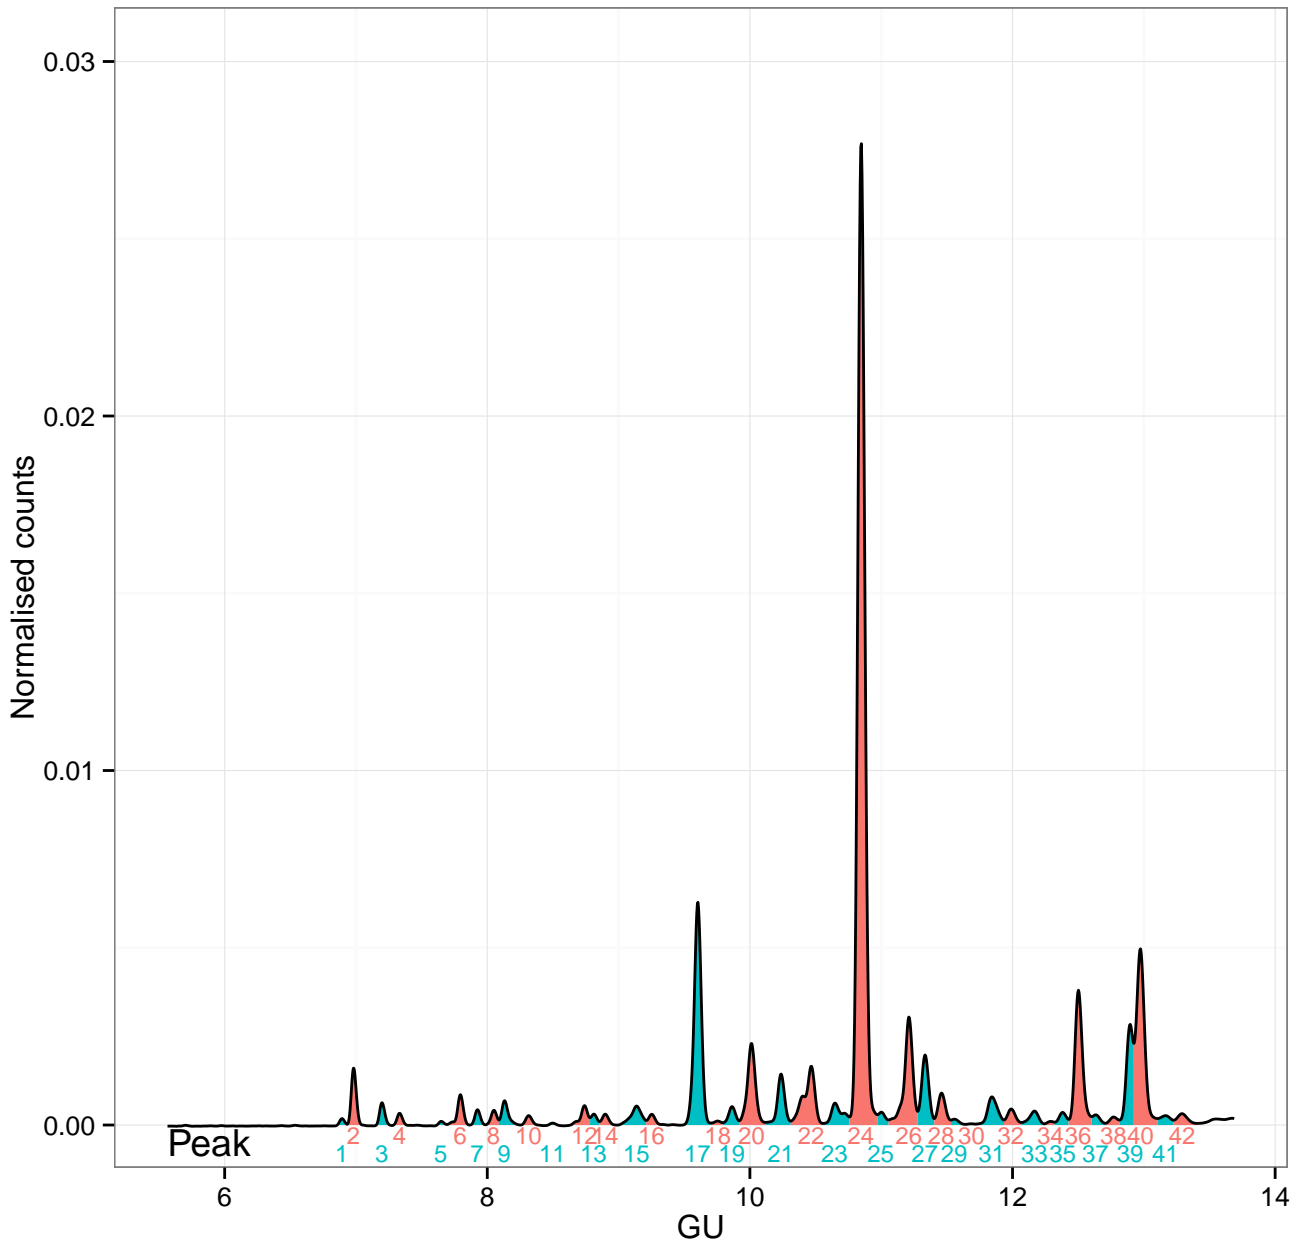

# W-2

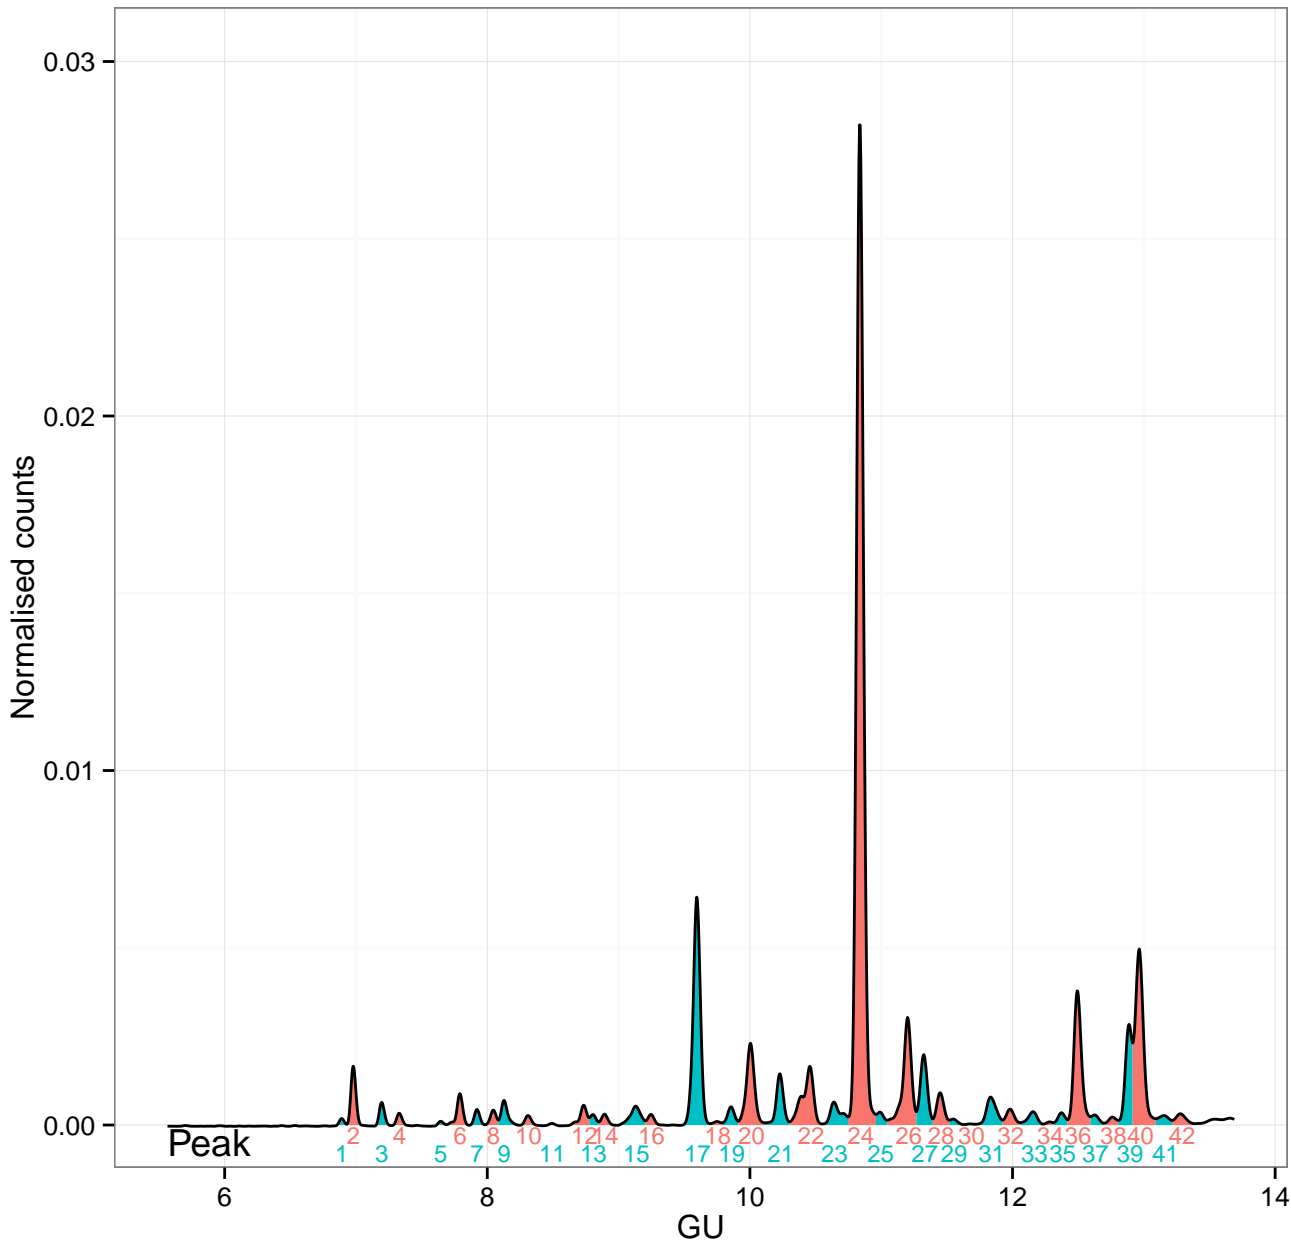

# W-3

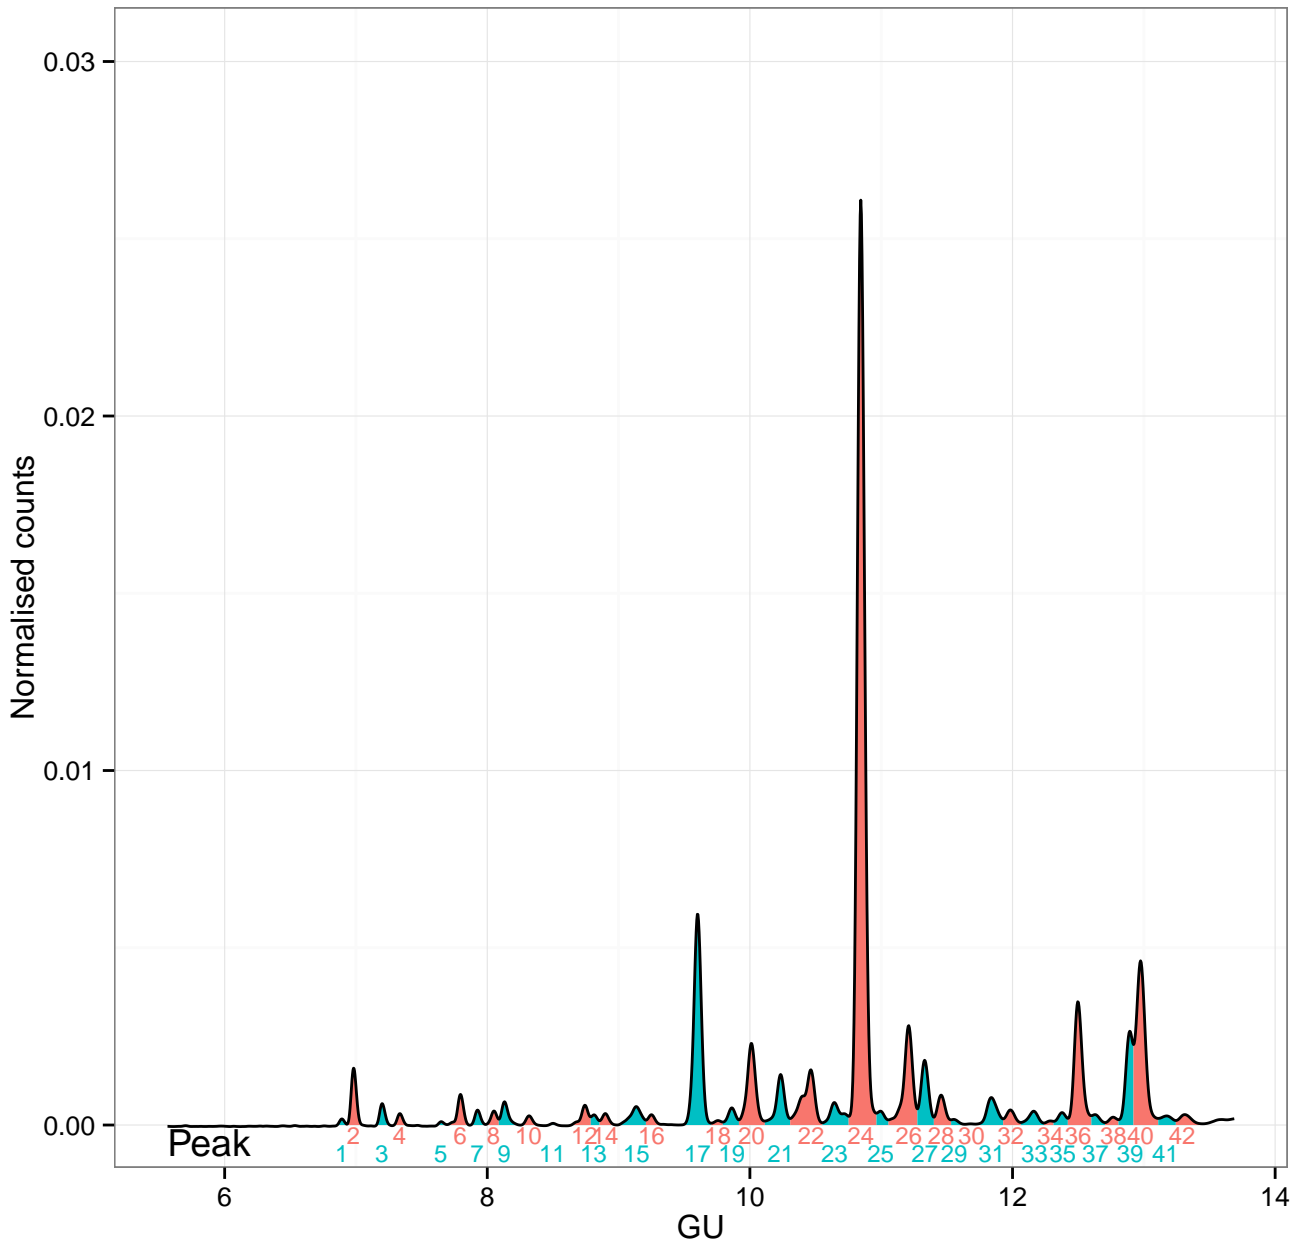

X-1

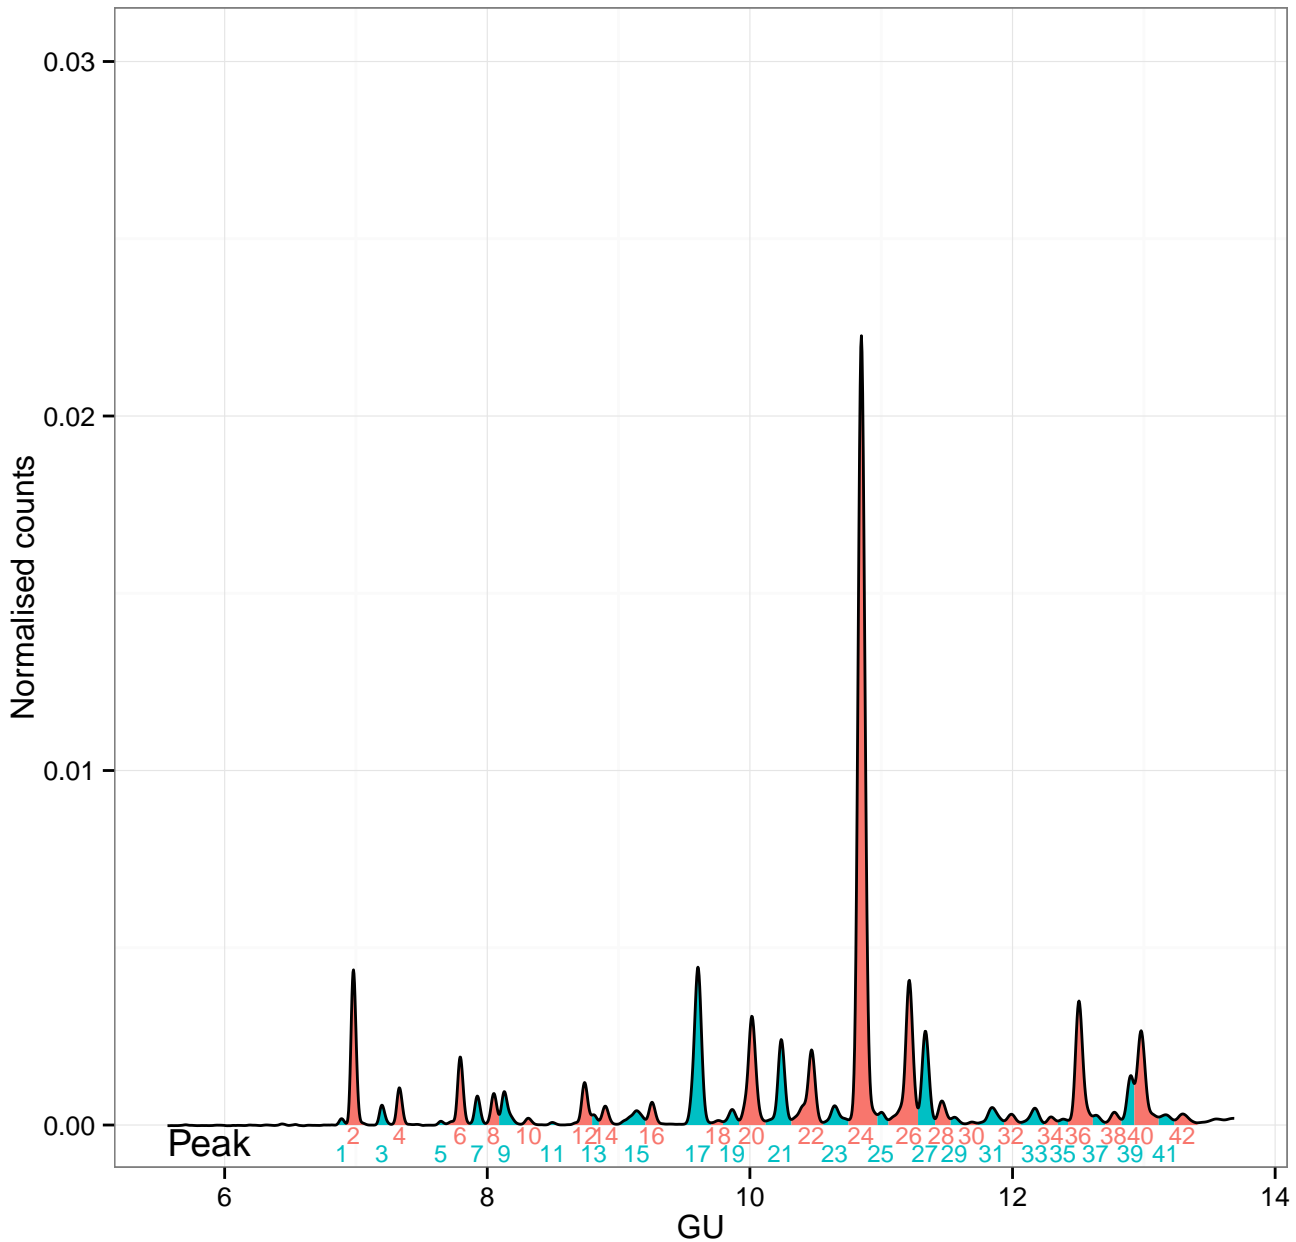

X-3

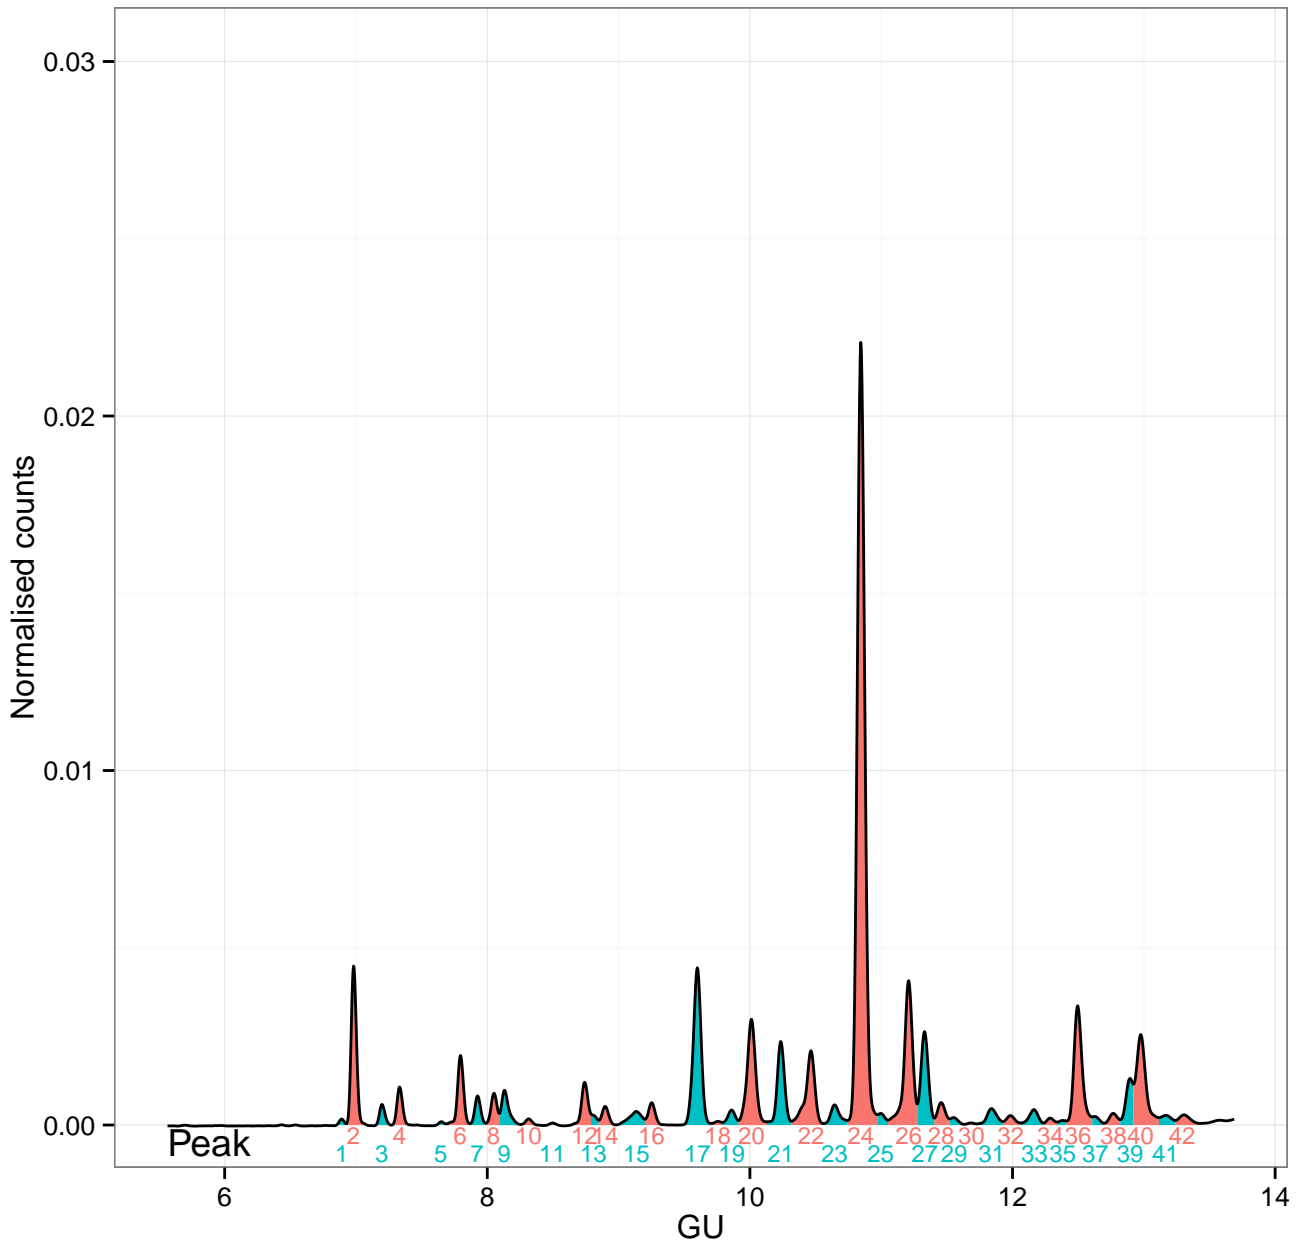

Supplement: pone.0123028.s004.pdf [file pone.0123028.s004.pdf]
