# Supplementary material for: Changes to Serum Sample Tube and Processing Methodology Does Not Cause Inter-Individual Variation in Automated Whole Serum N-Glycan Profiling in Health and Disease
Source: PLoS One. 2015 Apr 1;10(4):e0123028. doi: 10.1371/journal.pone.0123028 (PMC4382121; doi:10.1371/journal.pone.0123028)
Supplement: S1 Table — Patients are labeled A to X, with each patient having between 2 and 3 samples denoted by the letter. Data is expressed as area under each of the 42 chromatogram peaks defined using the perpendicular drop method. Serum N-glyans are split into neutral (peaks 1–16) and charged (peaks 17–42). (XLSX) [file pone.0123028.s001.xlsx]

## Sheet: New areas perpendicular drop me
	Peak	GU	A-1	A-2	A-3	B-1	B-2	B-3	C-1	C-2	C-3	D-1	D-2	D-3	E-1	E-3	F-1	F-3	G-1	G-2	G-3	H-1	H-2	H-3	I-1	I-2	I-3	J-1	J-3	K-1	K-2	K-3	L-1	L-3	M-1	M-2	M-3	N-1	N-3	O-1	O-2	O-3	P-1	P-3	Q-1	Q-2	Q-3	R-1	R-2
Neutral	1	5.89	0.00372031	0.00349962	0.00334278	0.00171948	0.00174014	0.00137461	0.00225704	0.00182557	0.00203354	0.00157588	0.00191449	0.00115485	0.00095009	0.000842333	0.00242791	0.0020845	0.00218248	0.00161678	0.00218706	0.00125802	0.000992699	0.00132435	0.00200056	0.00143548	0.00143813	0.00461836	0.00479629	0.000376357	0.000511002	0.000450552	0.00167114	0.00159353	0.000537784	0.000434785	0.000576757	0.0010893	0.00164315	0.000829109	0.000978567	0.00102238	0.000717202	0.000798338	0.00137435	0.00145687	0.00132245	0.00138548	0.000967774
	2	5.98	0.0411331	0.0378747	0.046913	0.0128815	0.0127728	0.0117337	0.0156554	0.0139265	0.0146873	0.0139747	0.0149092	0.0145956	0.0142577	0.0137358	0.0219246	0.022129	0.0135627	0.0131565	0.0137149	0.0139366	0.0131898	0.0135631	0.0235439	0.0237198	0.0222338	0.0246791	0.0252717	0.016781	0.0175875	0.0176501	0.0135293	0.0131728	0.00584869	0.00611576	0.00634753	0.0147029	0.0160478	0.0106172	0.00993701	0.0105919	0.0083778	0.00855889	0.0103313	0.0116654	0.0106741	0.0241983	0.0230651
	3	6.19	0.00779832	0.00763167	0.00797353	0.00808154	0.00813415	0.00755975	0.0102354	0.00920903	0.00994461	0.00888128	0.00903411	0.00828264	0.0128415	0.0124862	0.00872994	0.0082315	0.021259	0.0207683	0.0211524	0.00883877	0.0086607	0.00883918	0.00992958	0.00890812	0.00893366	0.00734736	0.00765701	0.00711197	0.00765871	0.00718825	0.0093931	0.00938421	0.00769275	0.00757616	0.00801954	0.00810605	0.00902438	0.0101847	0.00999314	0.0100655	0.0175666	0.0171961	0.00803452	0.00820286	0.00806554	0.00754717	0.00692635
	4	6.32	0.00664065	0.00748165	0.00690744	0.00341072	0.00346083	0.00277906	0.00420846	0.00348865	0.00381359	0.00278119	0.00328393	0.00235015	0.00307446	0.00292352	0.00363919	0.00331957	0.00507827	0.00431614	0.00515308	0.00470748	0.00414887	0.00463429	0.00407729	0.00343581	0.00337884	0.00509824	0.00523184	0.00542892	0.00608803	0.00579309	0.00303869	0.00285556	0.00172564	0.0015898	0.00186374	0.00242214	0.0033193	0.00151209	0.00171241	0.00177593	0.00146412	0.00163585	0.0026683	0.00312791	0.00279568	0.00732978	0.00661801
	5	6.61	0.00120101	0.00231754	0.00072285	0.000993161	0.000992168	0.000635465	0.00166795	0.00132811	0.00151847	0.00136082	0.00174726	0.000991888	0.000802437	0.000803704	0.00122729	0.000861076	0.00146099	0.00101208	0.00140879	0.000830774	0.000601921	0.000814492	0.00125896	0.000777567	0.000939143	0.00242962	0.00258951	0.000564975	0.00075871	0.000694137	0.00118845	0.00124138	0.00046613	0.000353559	0.000535146	0.000554893	0.00111018	0.000437926	0.000791684	0.000844921	0.000610866	0.000655841	0.000935886	0.000964748	0.000902755	0.000906512	0.0005014
	6	6.75	0.020216	0.0190648	0.0219788	0.0160126	0.0161253	0.0147857	0.0149814	0.0133377	0.014267	0.0197255	0.0210052	0.0203479	0.0287703	0.0278873	0.0158049	0.0154486	0.0148292	0.0140964	0.0148826	0.0158104	0.0149104	0.0153862	0.0256413	0.0259299	0.0247057	0.0138841	0.0142994	0.0157986	0.0165738	0.0163506	0.0154788	0.0151633	0.0100254	0.0102359	0.0105149	0.0111383	0.0125334	0.016575	0.0159075	0.0167591	0.0217626	0.0220236	0.00992311	0.0109259	0.0102065	0.0155846	0.0145385
	7	6.88	0.00685684	0.00762257	0.00749804	0.00634187	0.00645643	0.00554405	0.00658179	0.00574719	0.00606862	0.00781966	0.00861302	0.00793351	0.0102575	0.0101064	0.00568601	0.00528154	0.00454352	0.00401123	0.00459516	0.00643992	0.00590181	0.00617486	0.00998705	0.00981974	0.0094599	0.00558446	0.00576577	0.0059867	0.0062782	0.00641346	0.00733691	0.00699297	0.00385516	0.00390323	0.00412154	0.00405394	0.00475201	0.00619155	0.00605483	0.0064325	0.00612372	0.00619538	0.00388028	0.00436646	0.00396725	0.00640152	0.00573289
	8	6.99	0.00704758	0.00699702	0.00723845	0.00582007	0.00573233	0.00527359	0.00715807	0.006394	0.00688469	0.00609302	0.00648377	0.00588232	0.00961919	0.00944806	0.00574556	0.00532902	0.0128126	0.0124551	0.0128253	0.00736242	0.00704322	0.00714548	0.00590714	0.0054626	0.00543672	0.00705028	0.00714854	0.00669068	0.00708734	0.00697216	0.00561392	0.00545532	0.00342365	0.00338832	0.00361751	0.00519141	0.00609468	0.00531418	0.00522297	0.00546026	0.00712715	0.00705876	0.00539757	0.00564461	0.00538942	0.0069913	0.00641281
	9	7.07	0.0105708	0.0102675	0.010259	0.0128353	0.01304	0.0122817	0.0133824	0.0121651	0.0130359	0.0119533	0.0120651	0.0111786	0.0181102	0.0178324	0.0119481	0.0111326	0.0258122	0.0259631	0.0259258	0.0124482	0.0123374	0.012557	0.0141884	0.0130543	0.0132493	0.00988248	0.0102887	0.0120681	0.0124792	0.0117572	0.013731	0.0137215	0.0123771	0.01208	0.0126717	0.0123678	0.0138481	0.0134273	0.0131782	0.0133529	0.021728	0.0217573	0.013504	0.0136346	0.0133975	0.0127282	0.0124068
	10	7.25	0.00359532	0.0060959	0.00288991	0.00404442	0.00414454	0.00346583	0.00374948	0.00332408	0.00337042	0.00372487	0.00428135	0.00315237	0.00389681	0.00395414	0.00393699	0.00318631	0.00433723	0.00349919	0.00440579	0.00466914	0.00428124	0.00475662	0.00492959	0.0038273	0.00404805	0.00423927	0.00435311	0.003921	0.00440498	0.00420114	0.00396815	0.00382235	0.00414569	0.00374777	0.00413455	0.00383114	0.00313374	0.00378799	0.00431628	0.00439899	0.004482	0.00443146	0.00386944	0.00395853	0.0036331	0.00427027	0.00339725
	11	7.42	0.000395395	0.000535282	6.14973e-05	0.000647302	0.000692336	0.000344785	0.00114754	0.000723678	0.000894702	0.00079525	0.00122222	0.000345648	0.00102052	0.000974874	0.000591469	0.00017861	0.00171144	0.000987454	0.00160965	0.000909487	0.000523966	0.00100471	0.00100719	0.000317578	0.000542693	0.00107812	0.00114901	0.000430403	0.000788987	0.000599194	0.000915177	0.000947131	0.000390031	0.000220901	0.000468325	0.000634451	0.000576799	0.000444936	0.000799299	0.000808133	0.000905846	0.000804134	0.000977416	0.000989921	0.000881954	0.000652535	0.000244249
	12	7.65	0.0117087	0.0126493	0.0122688	0.0181755	0.0182527	0.0165558	0.0129079	0.0118898	0.0127729	0.0189606	0.0204548	0.0195403	0.0301609	0.029217	0.00951005	0.00923902	0.00957237	0.00884978	0.00956488	0.0187719	0.0181937	0.0180045	0.0182948	0.0178053	0.0176017	0.0100614	0.0103368	0.0158168	0.016664	0.016359	0.0139206	0.0135832	0.0145851	0.0144952	0.0155529	0.00805513	0.00828906	0.0167757	0.01616	0.0169629	0.0264177	0.0266928	0.00838365	0.00897068	0.00857612	0.00887978	0.00855741
	13	7.72	0.00518148	0.00549368	0.00466429	0.00239199	0.00241779	0.00281276	0.00256488	0.00231739	0.00224038	0.00378629	0.00396986	0.00338454	0.00469606	0.00492867	0.00657503	0.00610161	0.0072445	0.00689166	0.00724742	0.00328465	0.00246711	0.00323516	0.00539243	0.00469631	0.00493661	0.00579612	0.00603456	0.00350696	0.00371573	0.00373982	0.00383976	0.00386014	0.00327527	0.00346059	0.00306168	0.00319539	0.00397048	0.00507164	0.00521373	0.0051814	0.00721848	0.00721379	0.00347565	0.00359091	0.00340405	0.00354682	0.00328979
	14	7.81	0.00388483	0.00441794	0.00396266	0.00446074	0.00440293	0.00400395	0.0064493	0.0056454	0.00654833	0.00490064	0.00545082	0.00417797	0.00839489	0.00802483	0.00442321	0.00384077	0.0102882	0.00977731	0.0100547	0.00587944	0.00523312	0.00567152	0.00487719	0.00387661	0.00403499	0.00574259	0.0060128	0.00392529	0.00456589	0.00396735	0.0053424	0.00517921	0.00343492	0.00278468	0.0039039	0.00483438	0.0050408	0.00477499	0.00506543	0.00505939	0.00886258	0.00861826	0.00528182	0.005297	0.00517213	0.00361966	0.00324998
	15	8.04	0.0124356	0.0144419	0.0114131	0.0120459	0.012253	0.0114391	0.0141931	0.0129327	0.0141457	0.0149111	0.0153275	0.0132118	0.0133509	0.0132574	0.0126833	0.0118029	0.0171651	0.0158302	0.0167564	0.0110685	0.0103189	0.0110866	0.0127718	0.0107908	0.0113675	0.0147829	0.0155348	0.00907191	0.010117	0.00937382	0.0129758	0.0130198	0.0120864	0.0114111	0.0127134	0.0110462	0.0115185	0.0123236	0.0127655	0.0128758	0.0153536	0.0149312	0.0139817	0.0142166	0.0137814	0.00953403	0.00846879
	16	8.15	0.00532505	0.00675622	0.00518436	0.00360637	0.0037321	0.00318475	0.00502196	0.00408089	0.00460552	0.00421031	0.00501378	0.00340649	0.00504024	0.0049007	0.00433778	0.00354962	0.00656706	0.00561356	0.00661078	0.0041688	0.00358602	0.00433524	0.00609465	0.00474589	0.00503428	0.00465033	0.00486891	0.00267198	0.00351973	0.00321761	0.00435546	0.00427575	0.0019785	0.00171304	0.0022659	0.00191862	0.00263614	0.00324451	0.00358481	0.00373999	0.00419736	0.00401692	0.00275984	0.00299903	0.0028189	0.00392562	0.00326615
Charged	17	8.49	0.0879394	0.092162	0.0893367	0.0792122	0.0808657	0.0798463	0.0745018	0.0794233	0.0752206	0.0798502	0.0793134	0.0811648	0.0774763	0.0780092	0.086278	0.0873131	0.068408	0.0700066	0.0687402	0.0828225	0.0841908	0.0824726	0.0823601	0.081351	0.0814196	0.0936032	0.0958244	0.0692993	0.0710233	0.0700434	0.0833502	0.0836736	0.0878608	0.0890382	0.0874004	0.088708	0.0783211	0.0859645	0.0865386	0.0855	0.0848465	0.0844693	0.0876305	0.0892505	0.0873618	0.0755149	0.0768935
	18	8.64	0.00149678	0.00379398	0.00105069	0.00191882	0.00190609	0.00158076	0.00193611	0.0013909	0.00193249	0.00199764	0.00232111	0.00106826	0.00189458	0.001956	0.00190132	0.00143536	0.00247553	0.00177626	0.00245475	0.00204451	0.00167479	0.00209543	0.00275722	0.00161863	0.00204617	0.00152237	0.00183697	0.00159242	0.00192451	0.00162167	0.00267863	0.0027392	0.0020402	0.0015248	0.0020681	0.00215255	0.00143395	0.0016891	0.00195737	0.00199361	0.00224504	0.00225225	0.00199098	0.00209015	0.00188943	0.00186903	0.00130237
	19	8.75	0.00713561	0.00744841	0.00637586	0.00840973	0.00842702	0.00802682	0.012609	0.0118827	0.0126103	0.012812	0.0128335	0.0119581	0.0113561	0.0112117	0.00632203	0.00588796	0.0120988	0.0114275	0.0117204	0.00729465	0.00697432	0.00747828	0.0073329	0.00628774	0.00659319	0.0119487	0.0122361	0.00334635	0.00403781	0.0035142	0.0101718	0.0102486	0.00678372	0.00634123	0.00706941	0.00759843	0.00776131	0.00920666	0.00931109	0.00945382	0.0111483	0.0110148	0.0115681	0.011563	0.011524	0.004837	0.00461847
	20	8.9	0.0408708	0.0412623	0.0418346	0.0453494	0.0447499	0.0441407	0.0457817	0.044134	0.0474915	0.0480098	0.0478236	0.047012	0.0704594	0.0700004	0.0424	0.0418249	0.0520087	0.0519411	0.0514333	0.0440227	0.0423242	0.0426302	0.0517841	0.0501839	0.0492626	0.0449446	0.0460635	0.0370785	0.0385978	0.0368825	0.0456705	0.0457296	0.039513	0.0384637	0.0410363	0.0429065	0.0422602	0.0482719	0.0475035	0.047928	0.0812261	0.0815839	0.0367707	0.0371756	0.0368867	0.0282783	0.0283078
	21	9.13	0.0196601	0.0210537	0.0197495	0.0201493	0.0189729	0.0187705	0.034696	0.0324092	0.0366854	0.0268194	0.0269471	0.0239174	0.0440407	0.0433087	0.020327	0.0196896	0.0680377	0.0675258	0.0671257	0.0238632	0.0217228	0.0232611	0.0239432	0.0194773	0.0203831	0.027402	0.0286364	0.0126351	0.0156858	0.0124622	0.0281633	0.0285292	0.0170932	0.0148101	0.0188275	0.0261616	0.0266769	0.0257407	0.0259384	0.0262531	0.0479247	0.0453764	0.0243666	0.0247821	0.0250059	0.0159512	0.0155573
	22	9.37	0.0399277	0.0376717	0.0395953	0.0449681	0.0448148	0.0447667	0.0412156	0.0406694	0.0419253	0.0479954	0.0474708	0.0471004	0.0383571	0.0380521	0.0522183	0.0525798	0.0436233	0.0427311	0.0428762	0.0374406	0.0363536	0.036959	0.0433736	0.0416577	0.0418515	0.0418898	0.0423452	0.0609827	0.0614736	0.0607196	0.0472057	0.0478093	0.0564355	0.0564924	0.0573755	0.0305586	0.0334237	0.0426542	0.0429194	0.0425872	0.0446163	0.0444144	0.0470884	0.0469686	0.0472755	0.0400405	0.0396304
	23	9.55	0.0124013	0.0145461	0.0115057	0.0143463	0.014399	0.013782	0.0134575	0.0127195	0.0147226	0.011427	0.0121258	0.00975045	0.00996452	0.00945397	0.0119086	0.0112658	0.0150688	0.0147697	0.0145341	0.0154313	0.0144171	0.0146651	0.0143824	0.0128791	0.0135223	0.0112988	0.0117122	0.0117136	0.0124952	0.0112867	0.0148393	0.0144583	0.0159277	0.0148551	0.0163129	0.0152544	0.0149035	0.0122156	0.0123708	0.0121996	0.0104918	0.00976835	0.0149832	0.0152122	0.0155181	0.0141765	0.0145441
	24	9.77	0.350479	0.300695	0.360554	0.401367	0.404173	0.410809	0.348727	0.358305	0.348397	0.366314	0.355868	0.383809	0.323258	0.323984	0.342733	0.3522	0.287286	0.297129	0.289061	0.36206	0.370963	0.361101	0.339026	0.354625	0.35183	0.306716	0.304685	0.42437	0.414045	0.421293	0.373051	0.375472	0.351361	0.364048	0.348779	0.364586	0.393515	0.386191	0.378992	0.377372	0.318556	0.321999	0.332973	0.335284	0.335081	0.397824	0.408153
	25	9.93	0.0047371	0.00629344	0.00395288	0.00575931	0.0059513	0.00518527	0.00668793	0.00569966	0.00682286	0.0059367	0.00618427	0.0049945	0.00518284	0.0055057	0.00401093	0.00388982	0.00510709	0.00474438	0.00582264	0.00542018	0.00519994	0.00533912	0.00624324	0.00511046	0.00547954	0.00452423	0.00470192	0.00543606	0.00563796	0.00482449	0.0072701	0.00731176	0.00565819	0.00424128	0.00460125	0.00664099	0.00516915	0.00496758	0.00547507	0.00558324	0.00420974	0.00471673	0.0046805	0.00480587	0.00450313	0.0058085	0.00470774
	26	10.16	0.0656579	0.0608662	0.065235	0.0506887	0.0509143	0.0515117	0.0611769	0.0618253	0.0613313	0.0569397	0.0552039	0.057835	0.0658083	0.0660752	0.0594821	0.0594237	0.0496368	0.0499445	0.0500289	0.0395128	0.0399239	0.0395582	0.0679601	0.0704544	0.0703379	0.068321	0.0674743	0.0488929	0.0476054	0.0486249	0.0529232	0.0531001	0.0486185	0.0498863	0.0483949	0.0524821	0.0540558	0.0583091	0.0580372	0.057419	0.0640501	0.0646858	0.052457	0.0517063	0.0521608	0.0421678	0.0423293
	27	10.3	0.030395	0.029114	0.0302855	0.0235018	0.0237951	0.0239593	0.0381729	0.0383964	0.038299	0.0398338	0.0380219	0.0404647	0.0396236	0.0399634	0.0245808	0.0245292	0.0434492	0.0450448	0.0442558	0.019341	0.0196022	0.0191678	0.0244803	0.0250607	0.0253685	0.0447917	0.0439992	0.0100146	0.00966653	0.00979411	0.0295146	0.0295146	0.018518	0.0187713	0.0182038	0.0233056	0.0239483	0.0277381	0.0274099	0.0274149	0.0310791	0.0313877	0.0302613	0.02949	0.0301692	0.0150714	0.0150708
	28	10.44	0.012001	0.0154764	0.0113021	0.0098125	0.0100046	0.0102313	0.0100579	0.0102369	0.00996305	0.0113201	0.011668	0.0110477	0.00938673	0.0094635	0.0196921	0.0197137	0.0109236	0.0108915	0.0110789	0.0120459	0.0120682	0.0121897	0.010334	0.0103743	0.0105143	0.0131424	0.0126574	0.00936568	0.00913785	0.00954709	0.00903762	0.00900994	0.0162322	0.0160008	0.0154436	0.0108386	0.00874435	0.0104717	0.0110105	0.0109592	0.0107403	0.01063	0.0173107	0.0168489	0.0169299	0.0131131	0.0127129
	29	10.55	0.00333169	0.00488055	0.00264619	0.00342788	0.0034186	0.00325129	0.00284379	0.00258467	0.00262619	0.00289286	0.00316871	0.00218923	0.00299154	0.00309511	0.00361477	0.00334945	0.00318962	0.00260619	0.00323327	0.00261072	0.00245732	0.00272079	0.00322673	0.00297847	0.00298309	0.00270993	0.00264152	0.00319257	0.00338319	0.00319955	0.00309501	0.00316025	0.00268284	0.00192567	0.00266051	0.00244982	0.00230308	0.00289119	0.00320231	0.00319881	0.00280569	0.00262445	0.00333352	0.00336295	0.00336741	0.00325762	0.00268134
	30	10.7	0.000885274	0.00268317	0.000245961	0.000938558	0.00103242	0.000753031	0.00073484	0.000531786	0.000612737	0.000789536	0.00104112	0.000118374	0.000900406	0.000930548	0.001328	0.00103999	0.00105094	0.000536362	0.00114421	0.00101413	0.00077979	0.00101586	0.00110451	0.000771526	0.000848724	0.000657213	0.000717514	0.0011984	0.00144238	0.00139646	0.000980281	0.000917889	0.00095571	0.000782551	0.000981114	0.000947429	0.000463422	0.000733635	0.00108031	0.00110211	0.000870785	0.000909731	0.00123587	0.00117375	0.00108524	0.00117651	0.000790389
	31	10.88	0.0109168	0.0152151	0.00963174	0.0113011	0.0111465	0.0111234	0.0114277	0.0111703	0.0116928	0.00924107	0.00994224	0.00776039	0.010332	0.0104971	0.0118642	0.0115538	0.00988565	0.00888525	0.0096345	0.0159472	0.0152918	0.0159616	0.00919616	0.00833605	0.00863672	0.00923662	0.00906008	0.00829958	0.00907684	0.00826545	0.00886499	0.00873986	0.0136787	0.0120005	0.0136392	0.0155766	0.0110864	0.0107978	0.0114875	0.0116015	0.009152	0.00866436	0.0136404	0.0132628	0.0132831	0.0149053	0.0141988
	32	11.05	0.00552107	0.00954961	0.00452516	0.00453811	0.00468464	0.00454262	0.00541212	0.00525427	0.00536944	0.00416777	0.00465079	0.00327041	0.00319361	0.00315512	0.00447113	0.00408012	0.00566652	0.00518278	0.00573488	0.00685664	0.00657158	0.00692324	0.00705196	0.00647755	0.00693875	0.00802247	0.00782202	0.00516194	0.00543695	0.00532971	0.00627569	0.00609229	0.0052589	0.00446163	0.00508485	0.00998659	0.00650436	0.00488655	0.00522863	0.00532361	0.00383486	0.00379955	0.0087848	0.00847486	0.00871885	0.00664324	0.00600408
	33	11.26	0.00781481	0.0109319	0.00690983	0.00849952	0.00837406	0.00840539	0.00834412	0.00825264	0.00854751	0.00855364	0.0091348	0.00735002	0.00706517	0.0072824	0.0136849	0.0132887	0.00995411	0.00892141	0.00965758	0.00875882	0.00807295	0.00878269	0.00820233	0.00745211	0.00766096	0.00831706	0.00825258	0.0098079	0.0101513	0.0100571	0.0082279	0.00835195	0.016318	0.0156316	0.0164951	0.00613408	0.00533166	0.00717485	0.00789594	0.00796355	0.00724824	0.00707117	0.0116953	0.011126	0.011591	0.00899737	0.00824752
	34	11.4	0.00244228	0.00408173	0.00193208	0.00252871	0.00263061	0.00236825	0.00193738	0.00166886	0.00201751	0.00273514	0.00318791	0.00199501	0.00234541	0.00246784	0.00350356	0.00313051	0.00302334	0.00237535	0.00284748	0.00193079	0.00151591	0.00190505	0.0028928	0.00238881	0.00240349	0.00214992	0.00222444	0.00365369	0.00394219	0.00371922	0.00332369	0.00333754	0.0026962	0.00220072	0.00286038	0.00191743	0.00122391	0.00200127	0.00231805	0.00247187	0.00260517	0.00247423	0.00256272	0.002393	0.00254152	0.0022523	0.00176992
	35	11.51	0.00261961	0.00519625	0.00195086	0.00216816	0.00216095	0.00200801	0.0029958	0.00282304	0.00323588	0.00208586	0.00249739	0.00138657	0.00129297	0.00126862	0.00206649	0.00181606	0.00265094	0.00210591	0.00257353	0.00392758	0.00345827	0.00396236	0.004022	0.00336344	0.00351735	0.00332313	0.00332772	0.00226051	0.00246398	0.00226125	0.00324101	0.00319072	0.00244307	0.00203504	0.00241282	0.00593222	0.00387937	0.0021766	0.00253799	0.00252688	0.00173816	0.00158934	0.00416847	0.00393245	0.00399982	0.00355268	0.00288041
	36	11.65	0.052739	0.0534774	0.0514343	0.0628574	0.0620572	0.0658251	0.0534384	0.0566165	0.0537266	0.0522542	0.0510905	0.053781	0.0512856	0.05224	0.0847102	0.0872396	0.0528526	0.0545285	0.0529164	0.067913	0.0694953	0.0682267	0.0363339	0.0393403	0.0395014	0.0409028	0.0391959	0.0628272	0.0589869	0.0624237	0.0442711	0.0441217	0.0989918	0.101294	0.0960034	0.0471726	0.0434484	0.0561543	0.0566905	0.0560679	0.0445581	0.0445975	0.0641576	0.0618872	0.0644067	0.0706626	0.0718418
	37	11.79	0.00344896	0.00575058	0.00268412	0.00293359	0.00304768	0.00296506	0.00397373	0.00383006	0.0039669	0.00315877	0.00372632	0.00282271	0.00217661	0.0023177	0.00372216	0.00332867	0.00534458	0.00476061	0.00520767	0.00458741	0.00429612	0.00468742	0.0056371	0.00525034	0.00539655	0.00703204	0.00690051	0.00483805	0.00499107	0.00498541	0.00554608	0.00544302	0.00521178	0.00481438	0.00507131	0.00494473	0.00322833	0.00305504	0.0033158	0.00336076	0.0025288	0.00235482	0.00726485	0.00704374	0.00712832	0.0038579	0.00314859
	38	11.95	0.00483	0.00753152	0.00402754	0.00475283	0.00447855	0.00463222	0.00572443	0.00583681	0.00559691	0.0044686	0.0046609	0.00385625	0.00557891	0.00575013	0.0083328	0.00798412	0.00645491	0.0059316	0.00646361	0.005005	0.00477607	0.00496903	0.00414846	0.00385147	0.00379522	0.00427891	0.00414458	0.00691503	0.00668673	0.00687905	0.00343494	0.00360029	0.00948668	0.00926181	0.00925606	0.00568959	0.003658	0.00377139	0.0041226	0.0040148	0.00392558	0.00370698	0.00733631	0.00691359	0.00719752	0.00637596	0.00586744
	39	12.09	0.0219023	0.0226441	0.0206885	0.0225327	0.0222736	0.0233476	0.0239617	0.0250657	0.0235161	0.0183499	0.0178551	0.0182916	0.0177825	0.0183919	0.0203581	0.0206327	0.0162683	0.0165658	0.0163355	0.0332085	0.0341273	0.0340712	0.0162514	0.017229	0.0176529	0.0168219	0.0163306	0.0179582	0.0172174	0.0180654	0.0177567	0.0177774	0.0240429	0.0239762	0.0237336	0.0346482	0.0318489	0.023872	0.0242816	0.023864	0.0144465	0.014398	0.0213519	0.0205982	0.0211921	0.032397	0.033431
	40	12.17	0.0507357	0.0540696	0.0491502	0.0442288	0.0420514	0.0449982	0.0541108	0.057148	0.0537511	0.0463577	0.0469129	0.0483392	0.023958	0.024721	0.0384052	0.0390462	0.0525639	0.0566514	0.052384	0.0632867	0.0674082	0.0667712	0.0639873	0.0710336	0.0707351	0.0826613	0.0796928	0.055181	0.052156	0.0541932	0.0640719	0.0629595	0.0521626	0.0508248	0.0517147	0.0791135	0.0771852	0.0481824	0.0484351	0.0481013	0.0338575	0.0346172	0.0776165	0.0756815	0.0770607	0.0579002	0.0620624
	41	12.38	0.00588647	0.00911005	0.00497753	0.0049168	0.00443841	0.0045613	0.00616929	0.00619844	0.00588809	0.00490309	0.00551619	0.00436089	0.00514355	0.00547568	0.00701105	0.00663647	0.00598761	0.00583739	0.0061006	0.00594699	0.00611401	0.00643661	0.00585476	0.00572321	0.00570131	0.0060535	0.00582493	0.00563904	0.00568083	0.00551553	0.00499715	0.00490298	0.00701397	0.00632354	0.00686829	0.00928383	0.00699737	0.00471774	0.00522928	0.00527309	0.00421098	0.00424928	0.00759386	0.00718916	0.00725115	0.00768696	0.00761778
	42	12.5	0.00651369	0.011348	0.00513929	0.00542403	0.004882	0.0048335	0.00774408	0.00759049	0.00721902	0.00533179	0.00605686	0.00441943	0.00390144	0.00409924	0.00588141	0.0054046	0.00855647	0.00833405	0.00853993	0.00732244	0.00782932	0.00811586	0.00821165	0.00812046	0.00827901	0.0108038	0.0103537	0.00818815	0.00825494	0.00836798	0.00573934	0.00553987	0.00716644	0.00648313	0.00733705	0.0118684	0.00908941	0.00465287	0.00502892	0.00513433	0.00416792	0.00405648	0.0123985	0.0117709	0.0118824	0.00818002	0.00798712
[truncated: 16 more columns]
