# Supplementary material for: Changes to Serum Sample Tube and Processing Methodology Does Not Cause Inter-Individual Variation in Automated Whole Serum N-Glycan Profiling in Health and Disease
Source: PLoS One. 2015 Apr 1;10(4):e0123028. doi: 10.1371/journal.pone.0123028 (PMC4382121; doi:10.1371/journal.pone.0123028)
Supplement: S2 Table — (XLSX) [file pone.0123028.s002.xlsx]

## Sheet: New correlations perpendicular 
	A-1	A-2	A-3	B-1	B-2	B-3	C-1	C-2	C-3	D-1	D-2	D-3	E-1	E-3	F-1	F-3	G-1	G-2	G-3	H-1	H-2	H-3	I-1	I-2	I-3	J-1	J-3	K-1	K-2	K-3	L-1	L-3	M-1	M-2	M-3	N-1	N-3	O-1	O-2	O-3	P-1	P-3	Q-1	Q-2	Q-3	R-1	R-2	R-3	S-1
A-1	NA	0.994939	0.998378	0.664552	0.658015	0.659682	0.767476	0.756615	0.743701	0.670592	0.67218	0.691296	0.532868	0.529913	0.931095	0.942767	0.427286	0.424608	0.433761	0.683692	0.673082	0.683253	0.842326	0.848797	0.836492	0.9612	0.957371	0.811011	0.811402	0.82322	0.709811	0.702252	0.417512	0.445325	0.426848	0.813081	0.821836	0.586166	0.563933	0.578823	0.369305	0.376885	0.611342	0.664376	0.633554	0.955641	0.952883	0.95885	0.620438
A-2	0.998052	NA	0.990231	0.686135	0.680327	0.680785	0.783999	0.773972	0.761471	0.693754	0.695978	0.710274	0.54439	0.542031	0.935212	0.944651	0.424034	0.418413	0.429908	0.702977	0.691443	0.703114	0.849888	0.852277	0.842481	0.96942	0.966261	0.821346	0.824062	0.834566	0.728025	0.720587	0.451826	0.476783	0.461443	0.821914	0.824981	0.604699	0.585978	0.600275	0.383567	0.390571	0.634888	0.686752	0.655944	0.95415	0.949465	0.955018	0.640228
A-3	0.999793	0.997295	NA	0.640222	0.633164	0.633646	0.74221	0.730475	0.717279	0.645259	0.648369	0.66981	0.514127	0.510535	0.913226	0.926777	0.396581	0.39507	0.403478	0.663283	0.65266	0.661712	0.828109	0.837558	0.823107	0.946008	0.941482	0.795604	0.795398	0.808794	0.682948	0.674445	0.380067	0.409154	0.390258	0.788142	0.798109	0.557683	0.533427	0.549562	0.340109	0.348226	0.573398	0.628556	0.596702	0.947134	0.944687	0.951715	0.5864
B-1	0.993186	0.988475	0.99225	NA	0.999879	0.998606	0.944376	0.948708	0.945512	0.985518	0.983648	0.982955	0.961393	0.961969	0.818317	0.811927	0.668303	0.658662	0.670582	0.99136	0.991251	0.992647	0.925336	0.909951	0.924284	0.749675	0.750847	0.957137	0.959392	0.951696	0.972983	0.970136	0.925451	0.937618	0.932527	0.869709	0.858539	0.973899	0.96851	0.9746	0.903558	0.908362	0.852603	0.874787	0.865902	0.770434	0.775357	0.763314	0.940261
B-2	0.993156	0.98832	0.992276	0.999964	NA	0.998718	0.943513	0.947918	0.944792	0.98559	0.983542	0.982236	0.96101	0.961726	0.815099	0.808218	0.669666	0.659792	0.671894	0.989859	0.989813	0.991454	0.923332	0.907355	0.922135	0.744793	0.746134	0.954269	0.956653	0.948632	0.973481	0.970821	0.929057	0.940869	0.935884	0.868139	0.856817	0.974915	0.970035	0.975865	0.905647	0.910348	0.854592	0.876192	0.867612	0.766057	0.770858	0.758588	0.941767
B-3	0.992924	0.988194	0.991887	0.999945	0.999907	NA	0.947929	0.952929	0.949594	0.985866	0.982108	0.980928	0.959509	0.960754	0.826097	0.818515	0.692812	0.683438	0.694879	0.988615	0.988303	0.990777	0.923307	0.906374	0.921943	0.752175	0.753822	0.954095	0.956067	0.947559	0.978781	0.976934	0.936056	0.948008	0.941729	0.879916	0.869709	0.981956	0.977591	0.982264	0.91473	0.918972	0.869771	0.889815	0.882108	0.768816	0.774287	0.761506	0.953135
C-1	0.994839	0.991927	0.993501	0.996003	0.995653	0.995796	NA	0.999459	0.99891	0.940356	0.930303	0.926473	0.859127	0.859962	0.913942	0.905129	0.792736	0.7821	0.793756	0.937287	0.936571	0.943871	0.921843	0.90109	0.913634	0.863361	0.866018	0.933797	0.938877	0.927789	0.982007	0.981742	0.859274	0.867663	0.866494	0.964036	0.960485	0.926844	0.923098	0.924984	0.823409	0.823818	0.935764	0.956272	0.947255	0.86707	0.86794	0.859477	0.960684
C-2	0.995062	0.9928	0.993532	0.996085	0.995741	0.996005	0.999821	NA	0.999283	0.943475	0.932835	0.92887	0.863942	0.865087	0.909331	0.900179	0.797442	0.78695	0.79829	0.94113	0.940819	0.947665	0.917437	0.896069	0.909479	0.857696	0.860486	0.933946	0.938654	0.927249	0.98428	0.984321	0.872361	0.880378	0.879038	0.964495	0.959625	0.933808	0.93067	0.931996	0.83469	0.834985	0.941434	0.960521	0.952274	0.858303	0.859639	0.850586	0.966256
C-3	0.994305	0.991623	0.992907	0.995642	0.995273	0.995399	0.999945	0.999718	NA	0.940708	0.930016	0.924365	0.861899	0.862842	0.899019	0.889313	0.8007	0.789605	0.801035	0.937477	0.937196	0.944144	0.907984	0.885511	0.899519	0.849505	0.852635	0.92487	0.93046	0.917829	0.981107	0.981409	0.872736	0.879114	0.880205	0.959216	0.954048	0.930562	0.928285	0.929132	0.836004	0.835792	0.942835	0.960627	0.953264	0.846141	0.847397	0.838204	0.964684
D-1	0.994684	0.990942	0.993721	0.99755	0.997486	0.997218	0.998559	0.998284	0.998415	NA	0.998881	0.996309	0.957089	0.958144	0.832061	0.825319	0.637474	0.624609	0.638331	0.970945	0.965911	0.971373	0.940615	0.925907	0.939592	0.762781	0.764874	0.937594	0.94127	0.935285	0.971325	0.968732	0.902438	0.916034	0.909832	0.85756	0.847723	0.974104	0.970244	0.976786	0.885003	0.888934	0.8418	0.866264	0.855556	0.758831	0.760359	0.750994	0.942993
D-2	0.994841	0.991363	0.993922	0.997498	0.997417	0.997105	0.998435	0.998155	0.998299	0.999955	NA	0.997741	0.959394	0.95997	0.82312	0.817364	0.605632	0.592486	0.606708	0.970697	0.96491	0.970091	0.94267	0.929461	0.942148	0.75702	0.758696	0.937335	0.941381	0.9365	0.962449	0.958907	0.889713	0.903918	0.898216	0.841042	0.830523	0.966181	0.961507	0.969459	0.874126	0.878686	0.818881	0.845566	0.833619	0.754362	0.755586	0.746832	0.927093
D-3	0.995009	0.990906	0.994135	0.997876	0.99783	0.997609	0.998317	0.998138	0.998038	0.999887	0.999829	NA	0.963743	0.964067	0.83261	0.828988	0.600057	0.589053	0.602007	0.973032	0.967722	0.97143	0.953674	0.944229	0.954769	0.763542	0.764362	0.949122	0.951065	0.948386	0.96034	0.956067	0.875637	0.893107	0.883672	0.843283	0.835457	0.96453	0.956867	0.966051	0.869583	0.875183	0.804642	0.833961	0.820763	0.771166	0.773445	0.765188	0.920507
E-1	0.983419	0.979915	0.983088	0.985355	0.985357	0.984268	0.989099	0.987459	0.989657	0.990836	0.990915	0.989756	NA	0.999854	0.705005	0.699941	0.61102	0.604431	0.613557	0.960455	0.959653	0.957596	0.882972	0.875159	0.88805	0.600682	0.600776	0.903033	0.902587	0.89666	0.915514	0.911226	0.885444	0.901051	0.892483	0.756308	0.750589	0.961207	0.952909	0.960728	0.93326	0.93911	0.741791	0.763041	0.756737	0.650539	0.6587	0.646346	0.885454
E-3	0.984087	0.980764	0.983659	0.985982	0.985974	0.984958	0.989767	0.988242	0.990308	0.991366	0.991417	0.990311	0.999971	NA	0.70613	0.700616	0.616029	0.609425	0.618527	0.960326	0.959508	0.957711	0.882313	0.873993	0.887353	0.600239	0.60046	0.902606	0.90205	0.895998	0.917699	0.913645	0.890232	0.905747	0.896776	0.758681	0.752838	0.964057	0.956206	0.963669	0.936203	0.941923	0.747018	0.767633	0.761599	0.64945	0.65762	0.645035	0.889431
F-1	0.992016	0.991316	0.990556	0.993098	0.992952	0.993387	0.990948	0.991772	0.990827	0.99182	0.991738	0.991663	0.981869	0.982794	NA	0.999079	0.673312	0.667626	0.677408	0.819674	0.811255	0.825075	0.92807	0.919114	0.920547	0.968904	0.969185	0.898247	0.898976	0.900035	0.887567	0.885736	0.667918	0.689403	0.670699	0.95088	0.956264	0.79995	0.788308	0.79415	0.626869	0.630371	0.832752	0.868512	0.848311	0.959802	0.959099	0.957138	0.846014
F-3	0.991882	0.991056	0.990432	0.993204	0.993053	0.993535	0.990758	0.991635	0.9906	0.991641	0.991544	0.991559	0.981146	0.982091	0.999976	NA	0.652737	0.647758	0.657129	0.815469	0.806888	0.819828	0.928374	0.92184	0.921657	0.97222	0.971979	0.899194	0.899297	0.901831	0.87733	0.874828	0.650108	0.673197	0.653493	0.942347	0.94877	0.78878	0.775345	0.782304	0.612161	0.616322	0.81351	0.851527	0.830169	0.964418	0.963995	0.96278	0.831155
G-1	0.975538	0.974412	0.974051	0.976774	0.97591	0.97603	0.988062	0.986767	0.989024	0.983849	0.983837	0.982076	0.984023	0.984325	0.974933	0.974277	NA	0.999111	0.999813	0.665688	0.677762	0.683484	0.588967	0.556046	0.577684	0.559575	0.565013	0.63959	0.639837	0.614985	0.77171	0.78219	0.742971	0.740019	0.735515	0.826275	0.837312	0.74492	0.750233	0.734012	0.764103	0.755955	0.884937	0.868836	0.882251	0.608051	0.616366	0.600827	0.843472
G-2	0.97656	0.975606	0.974996	0.977592	0.976694	0.976933	0.988908	0.987809	0.989789	0.984487	0.98447	0.982872	0.983345	0.983721	0.975576	0.974982	0.999876	NA	0.999388	0.657337	0.670135	0.67486	0.582021	0.550698	0.571586	0.551498	0.556593	0.635183	0.634069	0.609887	0.762566	0.772917	0.73144	0.729499	0.723456	0.820998	0.833813	0.735984	0.740046	0.723986	0.757926	0.750201	0.874481	0.858406	0.871972	0.60638	0.615846	0.600076	0.832488
G-3	0.976498	0.975273	0.975034	0.977595	0.976762	0.976881	0.98875	0.987502	0.989659	0.984617	0.98458	0.982923	0.984534	0.984858	0.97566	0.975027	0.999971	0.999907	NA	0.668663	0.68089	0.686417	0.594231	0.561979	0.583195	0.562273	0.567472	0.645198	0.645061	0.620694	0.773463	0.783702	0.741554	0.739364	0.733917	0.828419	0.8402	0.74597	0.750611	0.734765	0.763893	0.756084	0.88318	0.867877	0.880884	0.615381	0.623891	0.608335	0.843317
H-1	0.991062	0.989842	0.989575	0.99645	0.995999	0.996513	0.994063	0.994974	0.993755	0.993321	0.993623	0.993661	0.978608	0.97948	0.99126	0.991472	0.977141	0.978638	0.97782	NA	0.999126	0.999467	0.92298	0.910134	0.922365	0.754834	0.754586	0.971287	0.973809	0.967357	0.95919	0.954672	0.900249	0.913831	0.908579	0.865587	0.854681	0.961107	0.953116	0.960251	0.892931	0.898079	0.829008	0.85429	0.843985	0.787891	0.793789	0.782826	0.921958
H-2	0.99061	0.989503	0.989023	0.99587	0.995395	0.996019	0.993526	0.994614	0.993128	0.992554	0.992838	0.993028	0.976521	0.977464	0.990535	0.990799	0.975706	0.977398	0.976438	0.999905	NA	0.999023	0.914945	0.901904	0.914444	0.744424	0.744128	0.968203	0.970106	0.963156	0.958043	0.95383	0.905071	0.918306	0.913093	0.865705	0.854904	0.960677	0.952521	0.959295	0.898642	0.903686	0.831501	0.855404	0.846085	0.782402	0.788867	0.777367	0.922512
H-3	0.990545	0.989567	0.98894	0.995719	0.995212	0.995839	0.993636	0.994673	0.993279	0.992538	0.992847	0.992936	0.976783	0.977713	0.990547	0.990786	0.976481	0.978119	0.977169	0.999928	0.999975	NA	0.923047	0.908677	0.921675	0.757752	0.757809	0.970517	0.973322	0.965943	0.964873	0.960959	0.907689	0.920512	0.915414	0.875056	0.864157	0.964767	0.957641	0.963992	0.897528	0.902253	0.84301	0.867032	0.857357	0.791562	0.797247	0.785893	0.930928
I-1	0.995255	0.993536	0.994511	0.991335	0.991071	0.990614	0.994897	0.994641	0.99465	0.994668	0.995156	0.994635	0.985227	0.985676	0.984799	0.984363	0.978705	0.979651	0.979396	0.989668	0.989159	0.989317	NA	0.997808	0.999412	0.860055	0.858983	0.961231	0.961238	0.96439	0.938725	0.932662	0.752933	0.777951	0.759515	0.885829	0.888386	0.898185	0.883538	0.895895	0.754808	0.762261	0.774727	0.816173	0.795044	0.898107	0.898714	0.894933	0.873331
I-2	0.995183	0.993289	0.994322	0.991244	0.990899	0.990703	0.99461	0.994598	0.994179	0.993998	0.994444	0.994279	0.982374	0.982935	0.984488	0.984178	0.976304	0.977608	0.977087	0.990301	0.990109	0.990183	0.999634	NA	0.99897	0.852252	0.850307	0.956774	0.955222	0.960866	0.919016	0.911856	0.720237	0.748023	0.727096	0.866071	0.871114	0.878553	0.861119	0.875267	0.730909	0.739528	0.739381	0.783987	0.761209	0.898307	0.899333	0.896583	0.846835
I-3	0.995133	0.993377	0.994158	0.991437	0.991091	0.99092	0.994985	0.995012	0.994592	0.994243	0.994667	0.994466	0.982482	0.983063	0.984781	0.984462	0.977038	0.978332	0.977808	0.99059	0.990403	0.990487	0.999652	0.999972	NA	0.850413	0.849036	0.961527	0.960581	0.964664	0.933981	0.927593	0.748647	0.774904	0.755082	0.876395	0.879988	0.897138	0.881486	0.89446	0.755175	0.763182	0.76239	0.804517	0.783175	0.892392	0.893612	0.889808	0.86705
J-1	0.988463	0.991704	0.986664	0.977268	0.976672	0.976875	0.988644	0.98956	0.988581	0.985418	0.985832	0.985068	0.971488	0.972447	0.976692	0.976188	0.977656	0.979464	0.978335	0.981018	0.981256	0.981506	0.99182	0.992091	0.992476	NA	0.999856	0.842328	0.846106	0.849095	0.806019	0.802664	0.573229	0.591259	0.581207	0.899157	0.899511	0.693477	0.681698	0.689596	0.493192	0.496713	0.769665	0.808964	0.785354	0.941826	0.93837	0.939862	0.751834
J-3	0.988789	0.992107	0.987122	0.977378	0.976854	0.976882	0.988644	0.989462	0.988647	0.985747	0.986198	0.985279	0.972894	0.97379	0.976805	0.976242	0.978323	0.979964	0.978972	0.980752	0.980836	0.981109	0.99216	0.992055	0.992439	0.999883	NA	0.840207	0.844256	0.846691	0.808836	0.805812	0.578787	0.596205	0.586676	0.901441	0.901549	0.696407	0.685308	0.692751	0.49714	0.500385	0.776139	0.814616	0.791454	0.938842	0.935285	0.936582	0.756452
K-1	0.989323	0.983304	0.988467	0.99723	0.997028	0.997295	0.990851	0.99097	0.990169	0.992687	0.99272	0.993428	0.974312	0.974967	0.989331	0.989627	0.968393	0.969427	0.969176	0.993439	0.993166	0.993024	0.988398	0.98913	0.989192	0.972079	0.971724	NA	0.999268	0.999071	0.9434	0.937311	0.813239	0.834956	0.819693	0.901358	0.89993	0.911891	0.89733	0.907762	0.798198	0.806128	0.80883	0.845074	0.827523	0.899023	0.904181	0.896605	0.88949
K-2	0.989817	0.983929	0.989077	0.997486	0.997326	0.997422	0.991253	0.991233	0.990655	0.993315	0.993407	0.993905	0.976039	0.976618	0.989423	0.989649	0.969835	0.97069	0.970566	0.993438	0.993001	0.992909	0.989221	0.989564	0.98963	0.972573	0.972436	0.99988	NA	0.998941	0.945596	0.939615	0.81674	0.837161	0.823932	0.902142	0.899483	0.912684	0.899204	0.909412	0.79826	0.805735	0.813721	0.849776	0.832269	0.898215	0.902601	0.895201	0.892484
K-3	0.989599	0.983634	0.988797	0.997274	0.997093	0.997324	0.990786	0.990912	0.990091	0.992747	0.9928	0.993496	0.974523	0.975167	0.989522	0.989812	0.968176	0.969186	0.968962	0.993455	0.993162	0.99302	0.988506	0.989196	0.989243	0.972111	0.971797	0.999987	0.999901	NA	0.935823	0.929088	0.797552	0.820121	0.804792	0.892211	0.890606	0.902171	0.887045	0.898536	0.78072	0.788926	0.792808	0.83139	0.812371	0.902848	0.907156	0.900574	0.877391
L-1	0.994001	0.991155	0.992847	0.996421	0.996167	0.99607	0.997758	0.997814	0.997575	0.997771	0.997952	0.997767	0.983888	0.984508	0.988027	0.987888	0.983133	0.984209	0.983802	0.995074	0.99471	0.994773	0.996798	0.996552	0.996849	0.989043	0.989201	0.993821	0.994401	0.993785	NA	0.999658	0.910902	0.921968	0.914835	0.940027	0.934836	0.973951	0.970812	0.972757	0.886945	0.8888	0.924111	0.942896	0.935161	0.823819	0.827113	0.815952	0.977704
L-3	0.993959	0.99099	0.992814	0.996568	0.996335	0.99622	0.997795	0.997826	0.997621	0.997897	0.998054	0.997873	0.984151	0.984767	0.988164	0.988022	0.983218	0.984246	0.983887	0.994951	0.994554	0.994617	0.996658	0.996344	0.996649	0.988666	0.988857	0.993937	0.994542	0.993902	0.999989	NA	0.915553	0.925999	0.918997	0.941664	0.936495	0.974508	0.972179	0.973342	0.890491	0.891937	0.931151	0.948434	0.941559	0.817903	0.821287	0.80977	0.981634
M-1	0.982859	0.983783	0.980266	0.98982	0.989372	0.990402	0.985695	0.987347	0.985677	0.986062	0.986115	0.985934	0.971318	0.972504	0.996298	0.996492	0.969481	0.970642	0.970059	0.992044	0.991795	0.991827	0.977538	0.978001	0.978572	0.97098	0.970534	0.987571	0.987154	0.987582	0.984344	0.984361	NA	0.998279	0.999243	0.798351	0.775515	0.951196	0.960952	0.954529	0.954105	0.953159	0.886669	0.881578	0.887645	0.567238	0.574368	0.555101	0.936499
M-2	0.98354	0.983894	0.981078	0.990533	0.990152	0.991154	0.985881	0.987524	0.985766	0.98655	0.98655	0.986566	0.971613	0.972791	0.996709	0.996938	0.968562	0.969742	0.969204	0.992099	0.991875	0.991841	0.977683	0.978244	0.978771	0.970417	0.969961	0.988403	0.987927	0.988438	0.984493	0.984529	0.999907	NA	0.997218	0.80802	0.788126	0.96266	0.969974	0.964905	0.958642	0.958662	0.882881	0.881048	0.885521	0.591847	0.599444	0.580663	0.943363
M-3	0.983652	0.984501	0.981139	0.990542	0.990088	0.991021	0.986672	0.988173	0.986704	0.98711	0.987207	0.98689	0.973078	0.974198	0.996543	0.996685	0.971222	0.97227	0.971744	0.992578	0.992228	0.992305	0.978922	0.979182	0.979744	0.97204	0.971697	0.988229	0.987954	0.988253	0.985454	0.985478	0.999932	0.999798	NA	0.799247	0.775999	0.952939	0.962265	0.956537	0.953824	0.952919	0.88479	0.88089	0.88644	0.572167	0.579105	0.560279	0.935966
N-1	0.991111	0.99107	0.989332	0.991175	0.990657	0.991169	0.993892	0.994957	0.993548	0.990726	0.990977	0.990996	0.973586	0.974607	0.983198	0.983214	0.976882	0.978806	0.977639	0.995674	0.99605	0.996104	0.99305	0.993955	0.994342	0.989617	0.989244	0.98792	0.987972	0.987822	0.99584	0.995616	0.981948	0.981757	0.98265	NA	0.995265	0.866387	0.862327	0.861007	0.750117	0.750136	0.946556	0.96431	0.954749	0.906891	0.909089	0.900973	0.926993
N-3	0.991818	0.98866	0.990524	0.993814	0.993354	0.993751	0.995426	0.995825	0.994924	0.993005	0.9931	0.993494	0.975805	0.97663	0.982804	0.982873	0.977874	0.979586	0.978658	0.995291	0.995515	0.995516	0.994071	0.995039	0.9953	0.986728	0.986299	0.991976	0.991979	0.991839	0.997423	0.997286	0.980054	0.980275	0.980907	0.998607	NA	0.856844	0.850187	0.849414	0.739379	0.74005	0.935986	0.955562	0.945837	0.918852	0.92211	0.914058	0.921584
O-1	0.994896	0.991579	0.99374	0.998917	0.998856	0.998734	0.99817	0.998276	0.997977	0.998875	0.998858	0.998892	0.989033	0.98967	0.992927	0.992817	0.981817	0.982589	0.98259	0.996173	0.995558	0.995515	0.994763	0.994297	0.994587	0.983825	0.984122	0.994395	0.994905	0.994451	0.998068	0.998183	0.988514	0.988987	0.989404	0.993671	0.995194	NA	0.998712	0.999376	0.957728	0.959613	0.876532	0.889338	0.886117	0.709441	0.715649	0.701874	0.971082
O-2	0.994844	0.991929	0.993572	0.998761	0.998689	0.998605	0.998168	0.998374	0.998007	0.998748	0.998736	0.998713	0.988706	0.989382	0.993358	0.99324	0.981974	0.982756	0.982733	0.996355	0.995759	0.995732	0.994643	0.994159	0.994488	0.984305	0.984599	0.994157	0.994664	0.994212	0.998028	0.998142	0.989258	0.989665	0.990119	0.993922	0.995105	0.999967	NA	0.999326	0.960459	0.961489	0.885968	0.895949	0.894004	0.690562	0.696086	0.681812	0.974006
O-3	0.994868	0.991823	0.993664	0.998825	0.998751	0.998637	0.998188	0.998326	0.99802	0.99885	0.998857	0.998824	0.989081	0.989728	0.993159	0.993039	0.982093	0.982854	0.982849	0.996323	0.9957	0.995678	0.994776	0.994272	0.994578	0.984123	0.98443	0.994223	0.994753	0.994283	0.998068	0.998179	0.988917	0.989335	0.989807	0.993785	0.995101	0.999986	0.999988	NA	0.955611	0.957335	0.876154	0.888594	0.885303	0.701347	0.70673	0.693008	0.969996
P-1	0.979109	0.977636	0.978296	0.981271	0.981101	0.979946	0.986397	0.9848	0.987346	0.9875	0.987807	0.985815	0.996955	0.996915	0.977731	0.976736	0.986201	0.985387	0.986373	0.976511	0.974324	0.974856	0.985474	0.981899	0.982174	0.973788	0.975516	0.970723	0.972908	0.970864	0.983579	0.983815	0.968819	0.968448	0.970958	0.974041	0.974898	0.986545	0.986453	0.986741	NA	0.999701	0.811498	0.8084	0.816379	0.525179	0.536942	0.518255	0.913444
P-3	0.980155	0.978483	0.979361	0.982288	0.98213	0.980997	0.987105	0.985554	0.987974	0.988352	0.988644	0.986789	0.99717	0.997154	0.97847	0.977508	0.985646	0.984933	0.985874	0.977406	0.975302	0.975788	0.986473	0.983097	0.983336	0.974615	0.976261	0.972034	0.974117	0.97217	0.984458	0.98468	0.969575	0.969278	0.971659	0.974991	0.975982	0.98739	0.98727	0.987561	0.999946	NA	0.807011	0.805205	0.812494	0.532132	0.54413	0.525474	0.912268
Q-1	0.989576	0.99153	0.987009	0.989744	0.989085	0.989984	0.993307	0.99481	0.993182	0.990949	0.991183	0.990839	0.972111	0.973289	0.989653	0.989621	0.979894	0.981742	0.980487	0.994361	0.994735	0.99488	0.9902	0.991092	0.991693	0.991788	0.991164	0.987429	0.987243	0.987314	0.994273	0.994044	0.990907	0.990414	0.99134	0.995291	0.992928	0.992049	0.992687	0.992389	0.973034	0.973841	NA	0.997063	0.9993	0.748232	0.75027	0.736069	0.955078
Q-2	0.990828	0.992516	0.988472	0.990821	0.990236	0.990969	0.99403	0.995417	0.993899	0.992044	0.992315	0.991931	0.973769	0.974877	0.990132	0.990078	0.980543	0.98229	0.981142	0.994951	0.995226	0.995363	0.991448	0.99212	0.992682	0.992176	0.99172	0.988355	0.988324	0.98828	0.995313	0.995105	0.990724	0.990294	0.99124	0.995825	0.993683	0.993116	0.9937	0.993434	0.974661	0.975449	0.999907	NA	0.998968	0.793033	0.79454	0.781677	0.962644
Q-3	0.989933	0.991681	0.98743	0.990269	0.989617	0.990491	0.993689	0.995129	0.993573	0.991401	0.991634	0.991289	0.972788	0.973938	0.990009	0.989982	0.980439	0.982246	0.981023	0.994702	0.995031	0.995179	0.990474	0.991317	0.991908	0.991649	0.991052	0.987953	0.987793	0.987842	0.994627	0.994405	0.991143	0.990673	0.991598	0.995381	0.993199	0.992465	0.993076	0.992792	0.973567	0.974359	0.999986	0.999931	NA	0.767951	0.770093	0.756332	0.961288
R-1	0.991294	0.987191	0.990334	0.996404	0.996151	0.996808	0.991202	0.992066	0.990377	0.990863	0.990854	0.991833	0.970988	0.971928	0.990636	0.991119	0.968598	0.970192	0.969541	0.996863	0.997008	0.996803	0.98602	0.987387	0.98752	0.973934	0.973357	0.996638	0.996182	0.99666	0.992401	0.992389	0.989475	0.99024	0.989664	0.992072	0.993947	0.99394	0.993903	0.993857	0.965626	0.966857	0.990004	0.990707	0.990446	NA	0.999297	0.999522	0.756478
R-2	0.990919	0.986985	0.989862	0.996084	0.995784	0.996514	0.991152	0.992101	0.990323	0.990555	0.990555	0.991555	0.970136	0.971107	0.990048	0.990544	0.968572	0.97028	0.969508	0.997083	0.99732	0.997114	0.986016	0.98753	0.987682	0.97456	0.973901	0.996378	0.995855	0.996377	0.992495	0.992454	0.989354	0.990075	0.989527	0.992698	0.994421	0.993731	0.993711	0.99365	0.965032	0.966278	0.99056	0.991191	0.990978	0.99995	NA	0.999512	0.75932
R-3	0.992018	0.987703	0.991249	0.996938	0.996778	0.997257	0.991493	0.992248	0.990694	0.991552	0.991553	0.992481	0.972556	0.97343	0.99078	0.991226	0.969046	0.970513	0.969993	0.996737	0.996756	0.996538	0.986629	0.987706	0.987817	0.973854	0.973477	0.996752	0.996474	0.996814	0.992859	0.992881	0.98884	0.989668	0.989113	0.991918	0.993947	0.994556	0.994474	0.99445	0.96719	0.96838	0.989347	0.990236	0.989826	0.999887	0.999757	NA	0.746145
S-1	0.992288	0.989748	0.991064	0.995037	0.995155	0.994693	0.994622	0.994405	0.994821	0.996782	0.996673	0.996077	0.991269	0.991798	0.995085	0.994669	0.981296	0.981238	0.981913	0.988803	0.987519	0.987592	0.991036	0.989248	0.989612	0.979905	0.980775	0.989922	0.990941	0.990064	0.993146	0.993453	0.988589	0.988964	0.989646	0.984256	0.985599	0.996525	0.996673	0.996616	0.989582	0.990147	0.987449	0.988618	0.987893	0.986374	0.98566	0.987365	NA
S-3	0.993082	0.990314	0.991733	0.995934	0.995992	0.99576	0.995403	0.995366	0.995466	0.997245	0.997068	0.996768	0.990038	0.990661	0.996142	0.99583	0.980609	0.980802	0.9813	0.990069	0.989019	0.989026	0.99136	0.990131	0.990482	0.980743	0.981301	0.991492	0.992185	0.991595	0.993726	0.993992	0.990244	0.990711	0.99112	0.985498	0.986972	0.997077	0.99722	0.997139	0.987606	0.988314	0.989034	0.990001	0.989446	0.988374	0.98775	0.989117	0.999762
T-1	0.981364	0.981771	0.978552	0.981172	0.980148	0.981855	0.982801	0.984718	0.981938	0.978414	0.978658	0.979388	0.951877	0.953308	0.978878	0.979198	0.959658	0.962409	0.960456	0.987037	0.988412	0.988397	0.983094	0.986465	0.986819	0.981723	0.979788	0.985072	0.983622	0.98481	0.984977	0.984535	0.982146	0.982017	0.982109	0.990209	0.989127	0.981592	0.982071	0.981744	0.951236	0.952767	0.992568	0.991849	0.992424	0.987412	0.988356	0.985686	0.972634
T-2	0.979482	0.980311	0.976479	0.9794	0.978291	0.980123	0.981484	0.98348	0.980663	0.97668	0.976931	0.977594	0.949819	0.9513	0.977605	0.977927	0.95894	0.96174	0.959699	0.985957	0.987388	0.987418	0.981488	0.984956	0.985354	0.980934	0.978897	0.983447	0.981927	0.983151	0.983509	0.983046	0.98157	0.981313	0.981503	0.989286	0.987879	0.979932	0.98048	0.980127	0.949535	0.95104	0.992107	0.99124	0.991928	0.985969	0.986979	0.984084	0.970883
T-3	0.979229	0.979853	0.976247	0.979166	0.978066	0.979924	0.981066	0.983092	0.98019	0.976291	0.976521	0.977293	0.949117	0.950607	0.977248	0.977594	0.957949	0.960805	0.958738	0.985594	0.987079	0.987074	0.981047	0.984649	0.985029	0.980365	0.978271	0.983337	0.981743	0.983042	0.983067	0.982598	0.981162	0.98098	0.981055	0.988885	0.98763	0.979572	0.980095	0.979742	0.948532	0.950085	0.991646	0.990768	0.991468	0.985922	0.986943	0.984019	0.970327
U-2	0.993477	0.992593	0.991785	0.99201	0.99142	0.992001	0.994437	0.995272	0.993938	0.992905	0.993223	0.993341	0.974411	0.97534	0.987828	0.987832	0.975424	0.977207	0.976176	0.993594	0.993932	0.993984	0.995735	0.997057	0.997272	0.991933	0.991214	0.992276	0.992048	0.992219	0.996484	0.996242	0.98593	0.985959	0.986607	0.995672	0.995818	0.99364	0.993829	0.993741	0.973655	0.974887	0.996758	0.997068	0.99687	0.991855	0.992249	0.991386	0.987907
U-3	0.994171	0.992619	0.992691	0.992308	0.991783	0.992287	0.994379	0.995128	0.993761	0.993186	0.993478	0.99379	0.974825	0.975713	0.987562	0.987584	0.974078	0.975887	0.974906	0.993108	0.993467	0.993447	0.996099	0.997548	0.997679	0.991452	0.990721	0.992646	0.99237	0.992616	0.996382	0.99614	0.984829	0.985055	0.985498	0.995111	0.995796	0.993756	0.993839	0.993789	0.973292	0.974632	0.995681	0.996087	0.995819	0.99204	0.992387	0.991654	0.987845
V-1	0.993283	0.991815	0.991846	0.993709	0.993196	0.993589	0.995482	0.996141	0.995043	0.994021	0.994359	0.994385	0.975859	0.976697	0.986414	0.986426	0.978692	0.980396	0.97939	0.995855	0.996063	0.996139	0.995875	0.996757	0.997006	0.990891	0.990485	0.992921	0.992991	0.992862	0.998385	0.998182	0.984616	0.984622	0.985449	0.998027	0.998455	0.995288	0.995385	0.995353	0.975809	0.976876	0.996612	0.997243	0.99681	0.993592	0.994021	0.993448	0.987882
V-2	0.991687	0.990245	0.990146	0.991929	0.991327	0.991895	0.993978	0.994797	0.993427	0.992092	0.992432	0.992652	0.972184	0.973096	0.984004	0.984083	0.976213	0.978221	0.976957	0.994939	0.995407	0.995442	0.994714	0.996112	0.996337	0.990697	0.990027	0.991762	0.991585	0.991654	0.99722	0.996946	0.982909	0.982917	0.983646	0.99789	0.998286	0.993462	0.993546	0.993502	0.972151	0.973354	0.996268	0.996743	0.996414	0.992819	0.99342	0.992457	0.984824
V-3	0.993728	0.99158	0.992441	0.994418	0.993965	0.994316	0.995643	0.996233	0.995133	0.994464	0.994748	0.994949	0.976255	0.97707	0.986466	0.986513	0.97792	0.979632	0.978676	0.995848	0.996055	0.99607	0.995945	0.996895	0.997097	0.989978	0.989571	0.993718	0.993747	0.993663	0.998548	0.998366	0.984172	0.984335	0.98498	0.997802	0.998724	0.995706	0.995718	0.995709	0.975575	0.976712	0.995849	0.996558	0.996081	0.994264	0.994648	0.9942	0.988132
W-1	0.993362	0.992874	0.991827	0.993063	0.992668	0.993202	0.994403	0.995623	0.993897	0.992323	0.992525	0.992806	0.973373	0.974423	0.98698	0.987119	0.975676	0.977628	0.976519	0.997102	0.99748	0.997455	0.992473	0.993533	0.993867	0.989342	0.988947	0.990201	0.990128	0.990198	0.99623	0.99603	0.985519	0.98559	0.986039	0.999002	0.998019	0.994653	0.994905	0.994754	0.972174	0.973224	0.996225	0.996798	0.996368	0.994812	0.995286	0.994672	0.985911
W-2	0.993632	0.992977	0.992191	0.993363	0.993012	0.993488	0.994357	0.995564	0.993828	0.992499	0.992701	0.993019	0.973566	0.974599	0.987057	0.987206	0.975287	0.977223	0.976153	0.997117	0.997478	0.997425	0.992534	0.99355	0.993863	0.988985	0.988641	0.990488	0.990447	0.990501	0.99633	0.996142	0.985351	0.98548	0.985872	0.998901	0.998025	0.994844	0.995069	0.994928	0.972195	0.973257	0.995899	0.996544	0.996057	0.99506	0.9955	0.994998	0.98613
W-3	0.992911	0.992766	0.991382	0.992357	0.991889	0.992411	0.994229	0.995375	0.993805	0.991917	0.992199	0.992292	0.973284	0.974303	0.986174	0.986279	0.976735	0.978661	0.977508	0.996956	0.997286	0.997332	0.992712	0.99366	0.993995	0.989994	0.989637	0.98954	0.989561	0.989524	0.996275	0.996051	0.984895	0.984816	0.985507	0.999166	0.998002	0.994163	0.994431	0.994298	0.972745	0.97373	0.996361	0.996937	0.996506	0.994034	0.994549	0.993878	0.98535
X-1	0.994083	0.991143	0.995022	0.983398	0.983062	0.982558	0.988891	0.987671	0.988629	0.987766	0.988082	0.987695	0.98539	0.985591	0.983632	0.983296	0.978271	0.978647	0.97901	0.980259	0.979047	0.97929	0.988882	0.988055	0.987679	0.981318	0.98189	0.978304	0.979283	0.978632	0.984756	0.984665	0.97013	0.97067	0.971483	0.978752	0.9811	0.985501	0.985084	0.985448	0.979637	0.980383	0.977188	0.978687	0.97782	0.979401	0.978704	0.980356	0.984639
X-3	0.99418	0.990753	0.995222	0.983412	0.983098	0.982607	0.988645	0.987429	0.988275	0.987587	0.98787	0.987679	0.984537	0.984744	0.982932	0.982636	0.977113	0.977599	0.977916	0.980008	0.97889	0.979074	0.988865	0.988244	0.98782	0.98099	0.981493	0.978618	0.979501	0.978941	0.984723	0.984623	0.96914	0.96981	0.970451	0.978775	0.981486	0.985353	0.984867	0.985244	0.978437	0.979281	0.976683	0.978211	0.977319	0.979753	0.97908	0.980716	0.98394
[truncated: 14 more columns]
